# Supplementary material for: General scaling relations and prediction of transition state energies in CHA/AlPO-34-structured zeolite catalysis related to the methanol-to-olefins conversion
Source: Royal Society of Chemistry journal article supplement (doi:10.1039/c9cy00534j), 2019-01-01
Supplement: c9cy00534j1.pdf [file c9cy00534j1.pdf]

# Supplementary Information

## **General scaling relations and prediction of transition state energies in CHA/AIPO-34-structured zeolite catalysis related to the methanol-to-olefins conversion**

Chuan-Ming Wang,\* Yang-Dong Wang, Zai-Ku Xie\*

State Key Laboratory of Green Chemical Engineering and Industrial Catalysis, SINOPEC  
Shanghai Research Institute of Petrochemical Technology, Shanghai 201208, China

\*Tel. : (+86)21-68462197; Fax: (+86)21-68462283

E-Mail: wangcm.sshy@sinopec.com; xzk@sinopec.com

**Table S1.** Adsorption enthalpies of NH<sub>3</sub> and NH<sub>2</sub>CH<sub>3</sub> in Me-CHA and Me-AlPO-34. The adsorption enthalpies of NH<sub>3</sub> calculated using hybrid functional with dispersion correction HSE06-D3 were included for comparison. The unit is kJ/mol.

| XC functional | $\Delta H_{\text{NH}_3}$ |          | $\Delta H_{\text{NH}_2\text{CH}_3}$ |
|---------------|--------------------------|----------|-------------------------------------|
|               | BEEF-vdW                 | HSE06-D3 | BEEF-vdW                            |
| Si-AlPO-34    | -104                     | -120     | -145                                |
| Ge-AlPO-34    | -94                      | -109     | -134                                |
| Ti-AlPO-34    | -78                      | -98      | -119                                |
| Mg-AlPO-34    | -142                     | -159     | -184                                |
| Zn-AlPO-34    | -127                     | -149     | -169                                |
| Al-CHA        | -125                     | -140     | -167                                |
| Ga-CHA        | -114                     | -131     | -155                                |

**Note.** The adsorption enthalpy differences between NH<sub>3</sub> and NH<sub>2</sub>CH<sub>3</sub> in Me-CHA/AlPO-34 are 40 ~ 42 kJ/mol, agreeing well with the experimental results in H-ZSM-5 and H-MOR (40 kJ/mol, *J. Am. Chem. Soc.* 1996, 118, 3262-3268).

**Table S2.** Definition of the relative TS enthalpies for each elementary step.

| Elementary step                               | Calculation of the relative TS enthalpies                                  |
|-----------------------------------------------|----------------------------------------------------------------------------|
| Concerted methylation of X                    | $\Delta H^\ddagger = H(TS) - H(HZ) - H(CH_3OH) - H(X)$                     |
| Stepwise methylation of X                     | $\Delta H^\ddagger = H(TS) + H(H_2O) - H(HZ) - H(CH_3OH) - H(X)$           |
| Cyclization of diene                          | $\Delta H^\ddagger = H(TS) - H(HZ) - H(Diene)$                             |
| Hydride transfer to produce CH <sub>4</sub>   | $\Delta H^\ddagger = H(TS) + H(H_2O) - H(HZ) - H(CH_3OH) - H(Olefin2)$     |
| Hydride transfer to produce ethane or propane | $\Delta H^\ddagger = H(TS) - H(HZ) - H(Olefin1) - H(Olefin2)$              |
| Ethylation of X                               | $\Delta H^\ddagger = H(TS) - H(HZ) - H(C_2H_4) - H(X)$                     |
| Elimination of propene in TME-cycle           | $\Delta H^\ddagger = H(TS) + 2 * H(H_2O) - H(HZ) - 3 * H(CH_3OH) - H(TME)$ |
| Elimination of propene in TMB-cycle           | $\Delta H^\ddagger = H(TS) + 2 * H(H_2O) - H(HZ) - 3 * H(CH_3OH) - H(TMB)$ |

**Note.** HZ is zeolite; olefin1 is ethene or propene acting as hydride acceptor; olefin2 is hydride donor.

**Table S3.** The slopes in five representative scaling relations fitted using DFT calculated enthalpies with BEEF-vdW and HSE06-D3, respectively. The geometries of TS structures were optimized using BEEF-vdW functional.

| <b>Elementary reaction</b>                                   | <b>BEEF-vdW</b> | <b>HSE06-D3</b> |
|--------------------------------------------------------------|-----------------|-----------------|
| Concerted methylation ( $\text{CH}_3\text{OH} + \text{C3}$ ) | $1.07 \pm 0.06$ | $1.05 \pm 0.05$ |
| Stepwise methylation ( $\text{CH}_3\text{Z} + \text{C3}$ )   | $0.74 \pm 0.06$ | $0.78 \pm 0.06$ |
| Cyclization ( $\text{C}_6\text{H}_{10}$ )                    | $0.82 \pm 0.06$ | $0.85 \pm 0.06$ |
| Hydride transfer ( $\text{CH}_3\text{Z} + \text{C5-iso}$ )   | $0.73 \pm 0.05$ | $0.77 \pm 0.05$ |
| Ethylation ( $\text{C}_2\text{H}_5\text{Z} + \text{C3}$ )    | $0.85 \pm 0.04$ | $0.88 \pm 0.04$ |

**Table S4.** TS enthalpies in Al-CHA and Ga-CHA zeolites calculated and predicted using CHA or AlPO-34 optimized cell size.

|                                       | CHA cell size | AlPO-34 cell size | Predicted data using scaling relations |                                                         |
|---------------------------------------|---------------|-------------------|----------------------------------------|---------------------------------------------------------|
|                                       |               |                   | fitted in 5 Me-AlPO-34 zeotypes        | deduced from Bader charge and TS enthalpy in Si-AlPO-34 |
| Stepwise methylation of TMB           |               |                   |                                        |                                                         |
| Al-CHA                                | -26           | -28               | -33                                    | -28                                                     |
| Ga-CHA                                | -17           | -21               | -23                                    | -20                                                     |
| Elimination of propene from TME-cycle |               |                   |                                        |                                                         |
| Al-CHA                                | -188          | -196              | -192                                   | -194                                                    |
| Ga-CHA                                | -174          | -184              | -181                                   | -184                                                    |
| Elimination of propene from TMB-cycle |               |                   |                                        |                                                         |
| Al-CHA                                | -221          | -233              | -226                                   | -228                                                    |
| Ga-CHA                                | -207          | -221              | -215                                   | -218                                                    |

**Note.** i) The calculated  $\Delta H_{\text{NH}_3}$  in Al-CHA and Ga-CHA using AlPO-34 cell size are -120 and -111 kJ/mol, respectively. ii) Cell parameter: CHA: 13.72, 13.72, and 14.86 Å; AlPO-34: 13.89, 13.89, and 15.09 Å.

**Table S5.** Bader charge variation of framework calculated in three systems for elementary steps or adsorption states of NH<sub>2</sub>R.

|                                                  |                                          | Si-ALPO-34 | Mg-ALPO-34 | Al-CHA |
|--------------------------------------------------|------------------------------------------|------------|------------|--------|
| <b>NH<sub>2</sub>R adsorption</b>                |                                          |            |            |        |
| 1                                                | NH <sub>3</sub>                          | 0.130      | 0.115      | 0.121  |
| 2                                                | NH <sub>2</sub> CH <sub>3</sub>          | 0.115      | 0.104      | 0.110  |
| <b>Concerted methylation by CH<sub>3</sub>OH</b> |                                          |            |            |        |
| 3                                                | C <sub>2</sub> H <sub>4</sub>            | 0.079      | 0.069      | 0.080  |
| 4                                                | C <sub>3</sub> H <sub>6</sub>            | 0.083      | 0.072      | 0.082  |
| 5                                                | C <sub>4</sub> H <sub>8</sub> -iso       | 0.091      | 0.083      | 0.091  |
| 6                                                | TME                                      | 0.096      | 0.088      | 0.096  |
| 7                                                | Toluene                                  | 0.086      | 0.076      | 0.084  |
| 8                                                | TMB                                      | 0.092      | 0.079      | 0.091  |
| 9                                                | CO                                       | 0.104      | 0.083      | 0.099  |
| 10                                               | NH <sub>3</sub>                          | 0.098      | 0.092      | 0.098  |
| <b>Stepwise methylation by CH<sub>3</sub>Z</b>   |                                          |            |            |        |
| 11                                               | C <sub>2</sub> H <sub>4</sub>            | 0.205      | 0.203      | 0.214  |
| 12                                               | C <sub>3</sub> H <sub>6</sub>            | 0.229      | 0.229      | 0.237  |
| 13                                               | C <sub>4</sub> H <sub>8</sub> -iso       | 0.259      | 0.256      | 0.264  |
| 14                                               | TME                                      | 0.266      | 0.267      | 0.277  |
| 15                                               | Toluene                                  | 0.227      | 0.225      | 0.228  |
| 16                                               | TMB                                      | 0.236      | 0.242      | 0.243  |
| 17                                               | CO                                       | 0.261      | 0.247      | 0.248  |
| 18                                               | H <sub>2</sub> O                         | 0.245      | 0.248      | 0.254  |
| 19                                               | CH <sub>3</sub> OH                       | 0.259      | 0.265      | 0.267  |
| 20                                               | NH <sub>3</sub>                          | 0.289      | 0.292      | 0.293  |
| <b>Cyclization</b>                               |                                          |            |            |        |
| 21                                               | C <sub>6</sub> H <sub>10</sub>           | 0.221      | 0.219      | 0.236  |
| 22                                               | C <sub>7</sub> H <sub>12</sub>           | 0.245      | 0.241      | 0.258  |
| <b>Hydride Transfer</b>                          |                                          |            |            |        |
| 23                                               | CH <sub>3</sub> Z + C4-1                 | 0.245      | 0.240      | 0.251  |
| 24                                               | CH <sub>3</sub> Z + C5-iso               | 0.262      | 0.255      | 0.266  |
| 25                                               | C <sub>2</sub> H <sub>5</sub> Z + C4-1   | 0.187      | 0.180      | 0.191  |
| 26                                               | C <sub>3</sub> H <sub>7</sub> Z + C5-iso | 0.108      | 0.112      | 0.125  |

| <b>Ethylation</b>     |                                          |       |       |       |
|-----------------------|------------------------------------------|-------|-------|-------|
| 27                    | C <sub>2</sub> H <sub>5</sub> Z + C3     | 0.189 | 0.191 | 0.197 |
| 28                    | C <sub>2</sub> H <sub>5</sub> Z + C4-iso | 0.218 | 0.217 | 0.225 |
| 29                    | C <sub>2</sub> H <sub>5</sub> Z + TME    | 0.236 | 0.227 | 0.240 |
| <b>C3 Elimination</b> |                                          |       |       |       |
| 30                    | C3+TME                                   | 0.119 | 0.105 | 0.118 |
| 31                    | C3+TMB                                   | 0.119 | 0.103 | 0.113 |

**Table S6.** Calculated entropy contribution at 673 K of the three elementary steps Me-CHA and Me-AlPO-34. The unit is kJ/mol.

|                   | <b>Concerted methylation</b><br>(CH <sub>3</sub> OH + C <sub>3</sub> ) | <b>Hydride transfer</b><br>(CH <sub>3</sub> Z + C <sub>5</sub> -iso) | <b>Cyclization</b><br>(C <sub>6</sub> H <sub>10</sub> ) |
|-------------------|------------------------------------------------------------------------|----------------------------------------------------------------------|---------------------------------------------------------|
| <b>Si-AlPO-34</b> | 244                                                                    | 250                                                                  | 202                                                     |
| <b>Ge-AlPO-34</b> | 242 <sup>[a]</sup>                                                     | 247                                                                  | 203                                                     |
| <b>Ti-AlPO-34</b> | 244                                                                    | 247                                                                  | 200                                                     |
| <b>Mg-AlPO-34</b> | 246                                                                    | 261 <sup>[b]</sup>                                                   | 203                                                     |
| <b>Zn-AlPO-34</b> | 247                                                                    | 251                                                                  | 203                                                     |
| <b>Al-CHA</b>     | 243                                                                    | 247                                                                  | 202                                                     |
| <b>Ga-CHA</b>     | 243                                                                    | 246                                                                  | 202                                                     |

**Note.** [a] There is one additional low imaginary frequency in the C<sub>3</sub> methylation via concerted pathway in all other systems except Ge-AlPO-34. This imaginary frequency was substituted by 12 cm<sup>-1</sup> to calculate thermochemistry. [b] There is one low imaginary frequency in the hydride transfer between CH<sub>3</sub>Z and C<sub>5</sub>-iso in Mg-AlPO-34.



**Equation S1.** The relationship between the variation of Bader charge of framework and the Bader charge of organic species in ion pair TS structure.

For any ion-pair structure, including TS and intermediate,

$$Q_{Framework} = -Q_{Organic\ species}$$

For pure zeolite with acid site,

$$Q_{Framework}^{HZ} = -Q_{Proton}^{HZ} = -1$$

The variation of Bader charge of framework in TS of an elementary reaction,

$$\begin{aligned}\Delta Q_{Framework} &= Q_{Framework}^{TS} - Q_{Framework}^{HZ} \\ &= 1 + Q_{Framework}^{TS} \\ &= 1 - Q_{Organic\ species}^{TS}\end{aligned}$$

Note. Q is the calculated Bader charge data, and the Bader charge of the acidic proton is +1 in Me-CHA/AlPO-34 systems. The pure zeotypes (HZ) and gaseous reactants were employed as the reference for the analysis of Bader charge with consistency to the calculation of relative TS energies.

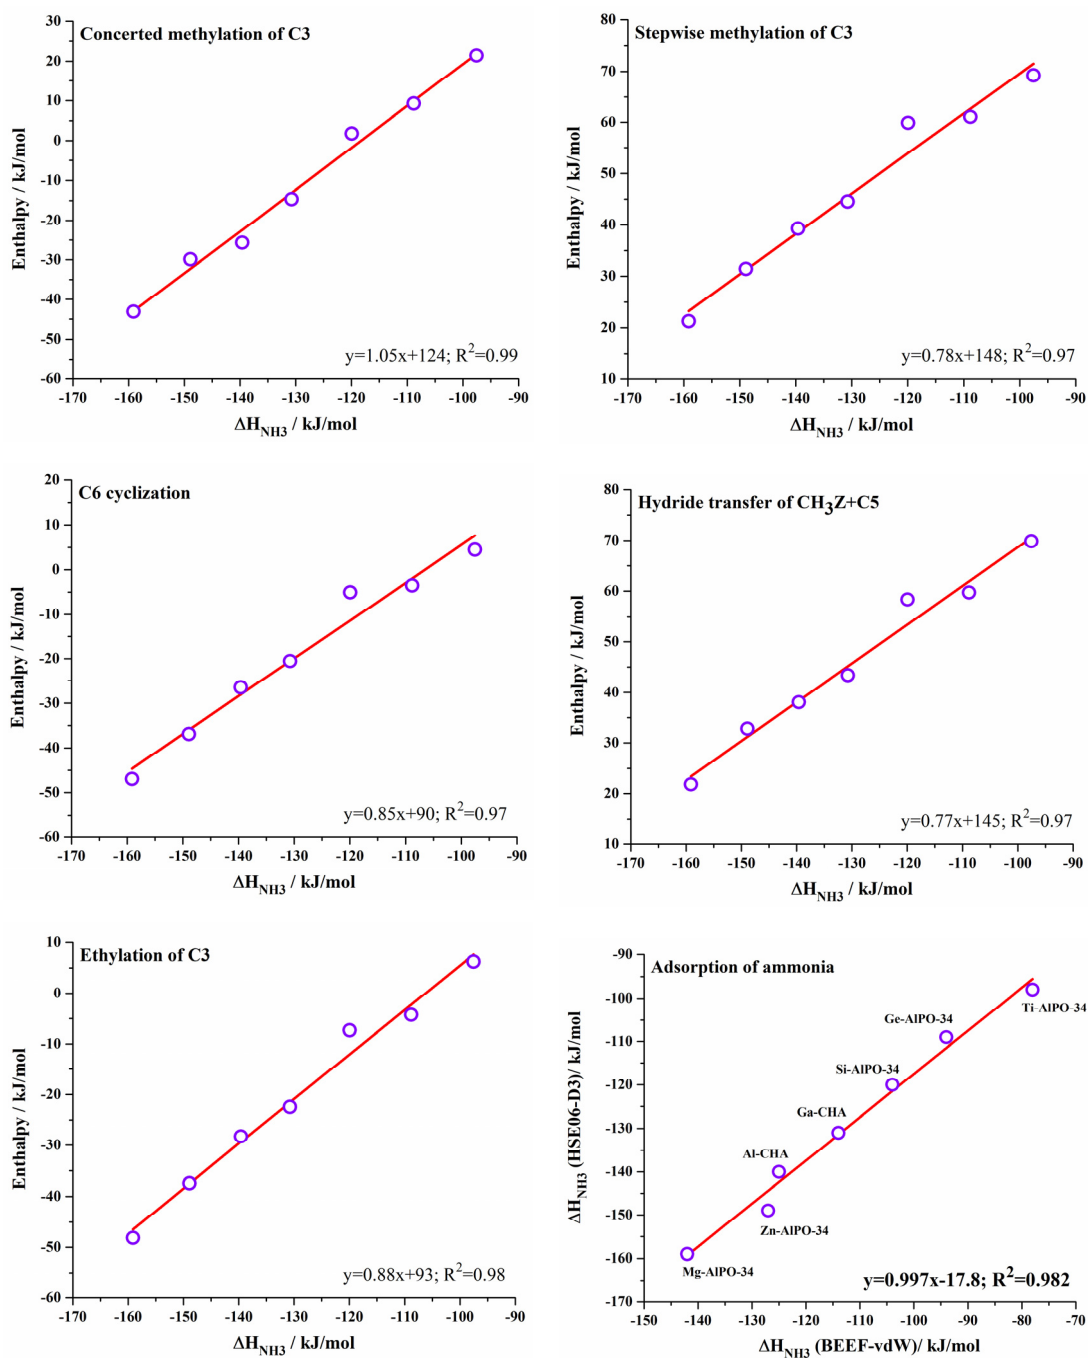

**Figure S1.** Scaling relations between the TS enthalpies and  $\Delta H_{\text{NH}_3}$  for five representative elementary reactions in Me-CHA/AlPO-34 calculated using HSE06-D3 functional. The agreement of the calculated adsorption enthalpies of  $\text{NH}_3$  using BEEF-vdW and HSE06-D3 were included (See also Table S1).

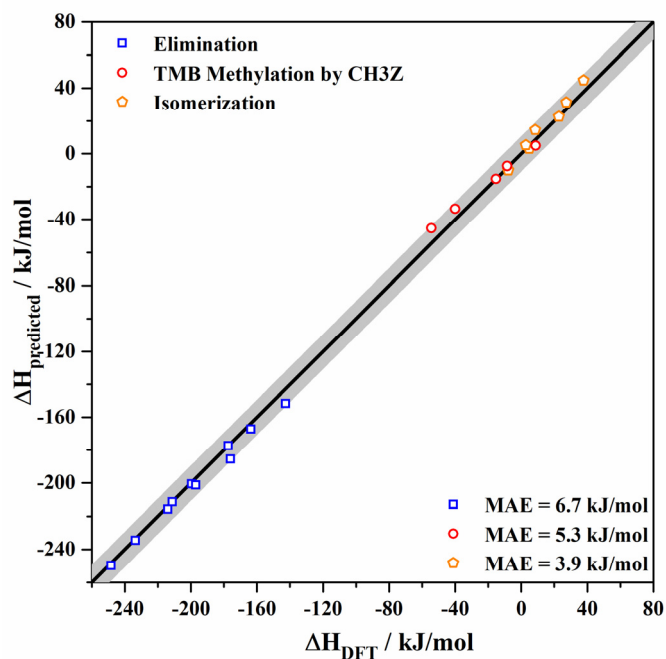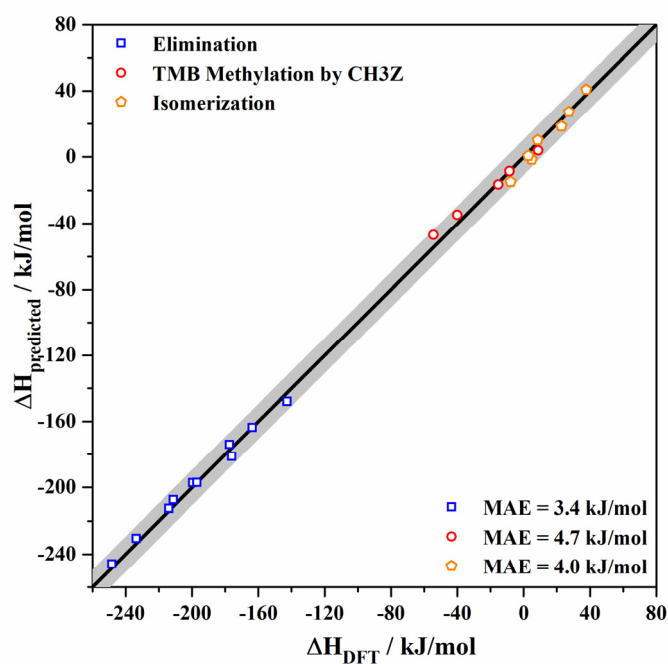

**Figure S2.** Using established Equation (2) and (3) to estimate the TS enthalpies for propene elimination and TMB stepwise methylation in Me-ALPO-34 and pentene isomerization in Me-CHA/ALPO-34 as testing elementary steps. The slope and intercept in the scaling relations were estimated using DFT calculated TS enthalpy and Bader charge in Si-ALPO-34 (top) or Ge-ALPO-34 (bottom) reference system. An interval of  $\pm 10$  kJ/mol is shaded in grey around the diagonal line ( $y=x$ ).

## Optimized structures in Si-AlPO-34 in cif format

### *Ads-NH3-Si-AlPO-34*

```
data_
_audit_creation_method    'Materials Studio'
_cell_length_a            13.885913
_cell_length_b            13.885913
_cell_length_c            15.094859
_cell_angle_alpha        90.000000
_cell_angle_beta         90.000000
_cell_angle_gamma        120.000000
_symmetry_space_group_name_H-M  'P1'
loop_
_atom_site_type_symbol
_atom_site_label
_atom_site_fract_x
_atom_site_fract_y
_atom_site_fract_z
  H    H1            0.846537            0.682669            0.534416
  H    H2            0.719018            0.619628            0.583923
  H    H3            0.825275            0.628768            0.640996
  H    H4            0.816349            0.743359            0.620451
  N    N5            0.802066            0.668380            0.596077
  O    O6            0.073723            0.290514            0.502239
  O    O7            0.296535            0.398435            0.839652
  O    O8            0.823634            0.437045            0.618277
  O    O9            0.486675            0.153742            0.459870
  O    O10           0.728368            0.619463            0.824581
  O    O11           0.965566            0.729413            0.165403
  O    O12           0.491403            0.762721            0.955742
  O    O13           0.145508            0.476866            0.800630
  O    O14           0.402799            0.954474            0.163038
  O    O15           0.620324            0.059738            0.515696
  O    O16           0.157955            0.099064            0.286206
  O    O17           0.821523            0.814495            0.122789
  O    O18           0.714510            0.292371            0.502513
  O    O19           0.599370            0.415150            0.839509
  O    O20           0.562083            0.900105            0.621800
  O    O21           0.847934            0.854411            0.467501
  O    O22           0.374489            0.632068            0.833861
  O    O23           0.268392            0.750766            0.174146
  O    O24           0.239810            0.247717            0.954557
```

|   |     |          |          |          |
|---|-----|----------|----------|----------|
| 0 | 025 | 0.518212 | 0.185982 | 0.798472 |
| 0 | 026 | 0.046035 | 0.962458 | 0.165254 |
| 0 | 027 | 0.933535 | 0.088923 | 0.514816 |
| 0 | 028 | 0.899495 | 0.579666 | 0.283048 |
| 0 | 029 | 0.188147 | 0.521443 | 0.130768 |
| 0 | 030 | 0.699970 | 0.935778 | 0.500311 |
| 0 | 031 | 0.578530 | 0.702589 | 0.837267 |
| 0 | 032 | 0.093784 | 0.175370 | 0.621617 |
| 0 | 033 | 0.147107 | 0.517419 | 0.463463 |
| 0 | 034 | 0.365986 | 0.264528 | 0.828457 |
| 0 | 035 | 0.250113 | 0.034956 | 0.175282 |
| 0 | 036 | 0.756194 | 0.513339 | 0.948988 |
| 0 | 037 | 0.809287 | 0.846963 | 0.794581 |
| 0 | 038 | 0.035372 | 0.594941 | 0.166188 |
| 0 | 039 | 0.918998 | 0.368612 | 0.514106 |
| 0 | 040 | 0.420181 | 0.844036 | 0.288006 |
| 0 | 041 | 0.479560 | 0.182423 | 0.128144 |
| 0 | 042 | 0.909353 | 0.709715 | 0.440229 |
| 0 | 043 | 0.691614 | 0.612488 | 0.084909 |
| 0 | 044 | 0.168680 | 0.581091 | 0.306693 |
| 0 | 045 | 0.500711 | 0.862045 | 0.464405 |
| 0 | 046 | 0.584757 | 0.057299 | 0.755368 |
| 0 | 047 | 0.359732 | 0.952136 | 0.421416 |
| 0 | 048 | 0.824185 | 0.908118 | 0.639175 |
| 0 | 049 | 0.165867 | 0.197291 | 0.801227 |
| 0 | 050 | 0.253607 | 0.389153 | 0.097630 |
| 0 | 051 | 0.020968 | 0.279297 | 0.748991 |
| 0 | 052 | 0.491479 | 0.245128 | 0.972000 |
| 0 | 053 | 0.839159 | 0.528265 | 0.126055 |
| 0 | 054 | 0.272654 | 0.716832 | 0.429294 |
| 0 | 055 | 0.387445 | 0.592602 | 0.086076 |
| 0 | 056 | 0.422347 | 0.100972 | 0.304726 |
| 0 | 057 | 0.130386 | 0.152764 | 0.463197 |
| 0 | 058 | 0.939019 | 0.045762 | 0.758507 |
| 0 | 059 | 0.057737 | 0.924623 | 0.417711 |
| 0 | 060 | 0.091456 | 0.439591 | 0.641672 |
| 0 | 061 | 0.798424 | 0.492028 | 0.791145 |
| 0 | 062 | 0.611429 | 0.379296 | 0.089770 |
| 0 | 063 | 0.716613 | 0.261379 | 0.748940 |
| 0 | 064 | 0.746800 | 0.762350 | 0.970367 |
| 0 | 065 | 0.468659 | 0.821284 | 0.133451 |
| 0 | 066 | 0.289501 | 0.086991 | 0.425000 |
| 0 | 067 | 0.407410 | 0.311090 | 0.087822 |
| 0 | 068 | 0.892174 | 0.820535 | 0.301776 |

|    |      |          |          |          |
|----|------|----------|----------|----------|
| O  | O69  | 0.840795 | 0.487197 | 0.458506 |
| O  | O70  | 0.950482 | 0.412661 | 0.758516 |
| O  | O71  | 0.067949 | 0.637111 | 0.415234 |
| O  | O72  | 0.558590 | 0.173779 | 0.639908 |
| O  | O73  | 0.505269 | 0.831152 | 0.801326 |
| O  | O74  | 0.620636 | 0.745283 | 0.096117 |
| O  | O75  | 0.734489 | 0.973161 | 0.752217 |
| O  | O76  | 0.232090 | 0.499770 | 0.975038 |
| O  | O77  | 0.176455 | 0.159828 | 0.128940 |
| Al | Al78 | 0.930408 | 0.606406 | 0.396214 |
| Al | Al79 | 0.596066 | 0.940274 | 0.732740 |
| Al | Al80 | 0.268469 | 0.275792 | 0.068084 |
| Al | Al81 | 0.387967 | 0.844173 | 0.400430 |
| Al | Al82 | 0.055414 | 0.174441 | 0.732395 |
| Al | Al83 | 0.725366 | 0.508583 | 0.063432 |
| Al | Al84 | 0.154915 | 0.061095 | 0.398761 |
| Al | Al85 | 0.822559 | 0.398444 | 0.730270 |
| Al | Al86 | 0.492220 | 0.731168 | 0.068656 |
| Al | Al87 | 0.058860 | 0.404169 | 0.529235 |
| Al | Al88 | 0.715459 | 0.733661 | 0.858845 |
| Al | Al89 | 0.388091 | 0.068294 | 0.192722 |
| Al | Al90 | 0.593496 | 0.168951 | 0.528597 |
| Al | Al91 | 0.262227 | 0.502064 | 0.862287 |
| Al | Al92 | 0.930908 | 0.833094 | 0.193080 |
| Al | Al93 | 0.828842 | 0.948513 | 0.525448 |
| Al | Al94 | 0.492824 | 0.277179 | 0.859934 |
| Al | Al95 | 0.164620 | 0.612322 | 0.194465 |
| Si | Si96 | 0.928346 | 0.831052 | 0.404294 |
| P  | P97  | 0.057772 | 0.175863 | 0.524939 |
| P  | P98  | 0.719982 | 0.509071 | 0.852588 |
| P  | P99  | 0.389646 | 0.842424 | 0.189997 |
| P  | P100 | 0.825278 | 0.395964 | 0.522817 |
| P  | P101 | 0.487370 | 0.732048 | 0.857724 |
| P  | P102 | 0.157166 | 0.063479 | 0.189946 |
| P  | P103 | 0.595789 | 0.939543 | 0.525524 |
| P  | P104 | 0.266847 | 0.277199 | 0.856487 |
| P  | P105 | 0.935171 | 0.609334 | 0.185747 |
| P  | P106 | 0.594584 | 0.169530 | 0.735333 |
| P  | P107 | 0.265720 | 0.501101 | 0.072252 |
| P  | P108 | 0.163717 | 0.613232 | 0.403236 |
| P  | P109 | 0.826687 | 0.944698 | 0.735990 |
| P  | P110 | 0.497105 | 0.279485 | 0.069568 |
| P  | P111 | 0.388329 | 0.072703 | 0.402281 |
| P  | P112 | 0.052419 | 0.401636 | 0.737081 |

|   |      |          |          |          |
|---|------|----------|----------|----------|
| P | P113 | 0.720613 | 0.733722 | 0.069232 |
|---|------|----------|----------|----------|

**Ads-CH3NH2-Si-AIPO-34**

data\_

\_audit\_creation\_method 'Materials Studio'

\_cell\_length\_a 13.885913

\_cell\_length\_b 13.885913

\_cell\_length\_c 15.094859

\_cell\_angle\_alpha 90.000000

\_cell\_angle\_beta 90.000000

\_cell\_angle\_gamma 120.000000

\_symmetry\_space\_group\_name\_H-M 'P1'

loop\_

\_atom\_site\_type\_symbol

\_atom\_site\_label

\_atom\_site\_fract\_x

\_atom\_site\_fract\_y

\_atom\_site\_fract\_z

|   |     |          |          |          |
|---|-----|----------|----------|----------|
| H | H1  | 0.845073 | 0.682563 | 0.538427 |
| H | H2  | 0.824672 | 0.627501 | 0.641860 |
| H | H3  | 0.817257 | 0.742060 | 0.623987 |
| H | H4  | 0.662727 | 0.519277 | 0.549341 |
| H | H5  | 0.654506 | 0.642297 | 0.533679 |
| H | H6  | 0.631184 | 0.579964 | 0.641384 |
| C | C7  | 0.677450 | 0.596669 | 0.579602 |
| N | N8  | 0.799221 | 0.666547 | 0.598203 |
| O | O9  | 0.073768 | 0.290418 | 0.501919 |
| O | O10 | 0.296552 | 0.398302 | 0.839685 |
| O | O11 | 0.824574 | 0.437730 | 0.618145 |
| O | O12 | 0.486749 | 0.153455 | 0.459745 |
| O | O13 | 0.728922 | 0.619755 | 0.824809 |
| O | O14 | 0.965251 | 0.729439 | 0.165825 |
| O | O15 | 0.491584 | 0.761867 | 0.955302 |
| O | O16 | 0.145772 | 0.477025 | 0.800340 |
| O | O17 | 0.402667 | 0.954498 | 0.163080 |
| O | O18 | 0.621259 | 0.059955 | 0.514699 |
| O | O19 | 0.158376 | 0.099107 | 0.286106 |
| O | O20 | 0.821613 | 0.814790 | 0.122576 |
| O | O21 | 0.714122 | 0.292748 | 0.503168 |
| O | O22 | 0.599320 | 0.415566 | 0.838758 |
| O | O23 | 0.562316 | 0.901153 | 0.621831 |
| O | O24 | 0.847620 | 0.853908 | 0.467605 |

|   |     |          |          |          |
|---|-----|----------|----------|----------|
| 0 | 025 | 0.374839 | 0.631745 | 0.833065 |
| 0 | 026 | 0.268428 | 0.750751 | 0.174365 |
| 0 | 027 | 0.239371 | 0.247166 | 0.954303 |
| 0 | 028 | 0.518537 | 0.186421 | 0.798239 |
| 0 | 029 | 0.045992 | 0.962502 | 0.165193 |
| 0 | 030 | 0.933478 | 0.088801 | 0.514239 |
| 0 | 031 | 0.899862 | 0.578911 | 0.282826 |
| 0 | 032 | 0.188111 | 0.521478 | 0.130501 |
| 0 | 033 | 0.699678 | 0.934715 | 0.500445 |
| 0 | 034 | 0.578873 | 0.702401 | 0.836381 |
| 0 | 035 | 0.093362 | 0.175150 | 0.621395 |
| 0 | 036 | 0.147097 | 0.517184 | 0.463302 |
| 0 | 037 | 0.366205 | 0.264586 | 0.828529 |
| 0 | 038 | 0.250119 | 0.035200 | 0.174670 |
| 0 | 039 | 0.755448 | 0.512602 | 0.949062 |
| 0 | 040 | 0.809653 | 0.847012 | 0.794451 |
| 0 | 041 | 0.035571 | 0.595367 | 0.165413 |
| 0 | 042 | 0.918671 | 0.367828 | 0.514011 |
| 0 | 043 | 0.420808 | 0.844173 | 0.287759 |
| 0 | 044 | 0.479532 | 0.182448 | 0.127990 |
| 0 | 045 | 0.909381 | 0.709588 | 0.439232 |
| 0 | 046 | 0.691581 | 0.612757 | 0.084791 |
| 0 | 047 | 0.168138 | 0.580532 | 0.306428 |
| 0 | 048 | 0.500604 | 0.861867 | 0.464548 |
| 0 | 049 | 0.585235 | 0.057538 | 0.756263 |
| 0 | 050 | 0.359760 | 0.951923 | 0.421071 |
| 0 | 051 | 0.824606 | 0.908880 | 0.639272 |
| 0 | 052 | 0.166256 | 0.197286 | 0.800695 |
| 0 | 053 | 0.253424 | 0.389133 | 0.097034 |
| 0 | 054 | 0.021213 | 0.279359 | 0.749077 |
| 0 | 055 | 0.492535 | 0.245985 | 0.971946 |
| 0 | 056 | 0.839208 | 0.528497 | 0.125776 |
| 0 | 057 | 0.272974 | 0.716410 | 0.428716 |
| 0 | 058 | 0.387500 | 0.592593 | 0.086195 |
| 0 | 059 | 0.421964 | 0.101039 | 0.304632 |
| 0 | 060 | 0.130576 | 0.152776 | 0.463085 |
| 0 | 061 | 0.939201 | 0.045977 | 0.758932 |
| 0 | 062 | 0.057446 | 0.924590 | 0.417460 |
| 0 | 063 | 0.091340 | 0.439338 | 0.641475 |
| 0 | 064 | 0.798566 | 0.491979 | 0.791274 |
| 0 | 065 | 0.611128 | 0.379673 | 0.090453 |
| 0 | 066 | 0.716696 | 0.261622 | 0.748157 |
| 0 | 067 | 0.746389 | 0.762638 | 0.970342 |
| 0 | 068 | 0.468452 | 0.821428 | 0.132838 |



|    |      |          |          |          |
|----|------|----------|----------|----------|
| O  | O69  | 0.289439 | 0.086753 | 0.425262 |
| O  | O70  | 0.407004 | 0.310750 | 0.087483 |
| O  | O71  | 0.891590 | 0.821237 | 0.301703 |
| O  | O72  | 0.841040 | 0.486810 | 0.458090 |
| O  | O73  | 0.950629 | 0.412637 | 0.758531 |
| O  | O74  | 0.068202 | 0.637132 | 0.415291 |
| O  | O75  | 0.558038 | 0.172216 | 0.639788 |
| O  | O76  | 0.505418 | 0.830986 | 0.801099 |
| O  | O77  | 0.620617 | 0.745545 | 0.096345 |
| O  | O78  | 0.734619 | 0.973135 | 0.752564 |
| O  | O79  | 0.232553 | 0.500508 | 0.974748 |
| O  | O80  | 0.176064 | 0.159953 | 0.128941 |
| Al | Al81 | 0.930618 | 0.606493 | 0.396053 |
| Al | Al82 | 0.596371 | 0.940553 | 0.732910 |
| Al | Al83 | 0.268097 | 0.275574 | 0.067803 |
| Al | Al84 | 0.388116 | 0.844012 | 0.400151 |
| Al | Al85 | 0.055477 | 0.174421 | 0.732257 |
| Al | Al86 | 0.725148 | 0.508678 | 0.063554 |
| Al | Al87 | 0.154846 | 0.060881 | 0.398671 |
| Al | Al88 | 0.822897 | 0.398735 | 0.730085 |
| Al | Al89 | 0.492191 | 0.731120 | 0.068445 |
| Al | Al90 | 0.058740 | 0.403924 | 0.529026 |
| Al | Al91 | 0.715829 | 0.733920 | 0.858802 |
| Al | Al92 | 0.387939 | 0.068351 | 0.192577 |
| Al | Al93 | 0.593581 | 0.168526 | 0.528450 |
| Al | Al94 | 0.262392 | 0.502098 | 0.862026 |
| Al | Al95 | 0.930712 | 0.833291 | 0.193214 |
| Al | Al96 | 0.829063 | 0.948331 | 0.525430 |
| Al | Al97 | 0.493190 | 0.277525 | 0.859845 |
| Al | Al98 | 0.164460 | 0.612258 | 0.194257 |
| Si | Si99 | 0.928034 | 0.830669 | 0.404192 |
| P  | P100 | 0.057679 | 0.175714 | 0.524622 |
| P  | P101 | 0.720029 | 0.509069 | 0.852542 |
| P  | P102 | 0.389718 | 0.842486 | 0.189853 |
| P  | P103 | 0.825526 | 0.395998 | 0.522790 |
| P  | P104 | 0.487629 | 0.731700 | 0.857173 |
| P  | P105 | 0.157120 | 0.063554 | 0.189778 |
| P  | P106 | 0.596014 | 0.939578 | 0.525362 |
| P  | P107 | 0.266862 | 0.277021 | 0.856332 |
| P  | P108 | 0.935228 | 0.609345 | 0.185596 |
| P  | P109 | 0.594688 | 0.169398 | 0.735286 |
| P  | P110 | 0.265776 | 0.501266 | 0.072006 |
| P  | P111 | 0.163678 | 0.612955 | 0.402999 |
| P  | P112 | 0.826973 | 0.944948 | 0.736110 |

|   |      |          |          |          |
|---|------|----------|----------|----------|
| P | P113 | 0.497149 | 0.279677 | 0.069603 |
| P | P114 | 0.388208 | 0.072512 | 0.402208 |
| P | P115 | 0.052534 | 0.401618 | 0.736963 |
| P | P116 | 0.720547 | 0.734006 | 0.069239 |

***TS-Methylation-MeOH-C2-Si-AIPO-34***

data\_

\_audit\_creation\_method 'Materials Studio'

\_cell\_length\_a 13.885913

\_cell\_length\_b 13.885913

\_cell\_length\_c 15.094859

\_cell\_angle\_alpha 90.000000

\_cell\_angle\_beta 90.000000

\_cell\_angle\_gamma 120.000000

\_symmetry\_space\_group\_name\_H-M 'P1'

loop\_

\_atom\_site\_type\_symbol

\_atom\_site\_label

\_atom\_site\_fract\_x

\_atom\_site\_fract\_y

\_atom\_site\_fract\_z

|   |     |          |          |          |
|---|-----|----------|----------|----------|
| H | H1  | 0.833066 | 0.676853 | 0.544296 |
| H | H2  | 0.612130 | 0.535641 | 0.651991 |
| H | H3  | 0.647292 | 0.489202 | 0.548178 |
| H | H4  | 0.605993 | 0.598501 | 0.545186 |
| H | H5  | 0.802752 | 0.732441 | 0.619535 |
| H | H6  | 0.452369 | 0.346369 | 0.647071 |
| H | H7  | 0.412110 | 0.454863 | 0.647618 |
| H | H8  | 0.468368 | 0.357722 | 0.483360 |
| H | H9  | 0.427744 | 0.466242 | 0.482760 |
| C | C10 | 0.612815 | 0.534517 | 0.580373 |
| C | C11 | 0.439911 | 0.406398 | 0.610240 |
| C | C12 | 0.448071 | 0.412222 | 0.520444 |
| O | O13 | 0.079577 | 0.293551 | 0.503780 |
| O | O14 | 0.298960 | 0.400572 | 0.839450 |
| O | O15 | 0.821002 | 0.428568 | 0.619092 |
| O | O16 | 0.486409 | 0.158312 | 0.463419 |
| O | O17 | 0.729092 | 0.619499 | 0.828533 |
| O | O18 | 0.966405 | 0.730427 | 0.169348 |
| O | O19 | 0.492910 | 0.760863 | 0.957479 |
| O | O20 | 0.147328 | 0.478371 | 0.802034 |
| O | O21 | 0.404225 | 0.955872 | 0.166815 |

|   |     |          |          |          |
|---|-----|----------|----------|----------|
| 0 | 022 | 0.611950 | 0.055780 | 0.521890 |
| 0 | 023 | 0.160268 | 0.101535 | 0.288435 |
| 0 | 024 | 0.824243 | 0.816621 | 0.122498 |
| 0 | 025 | 0.715863 | 0.288832 | 0.500028 |
| 0 | 026 | 0.599565 | 0.415803 | 0.838388 |
| 0 | 027 | 0.565017 | 0.895716 | 0.624574 |
| 0 | 028 | 0.848222 | 0.858610 | 0.467701 |
| 0 | 029 | 0.375994 | 0.633310 | 0.834082 |
| 0 | 030 | 0.269010 | 0.752352 | 0.177899 |
| 0 | 031 | 0.243231 | 0.251762 | 0.956367 |
| 0 | 032 | 0.518562 | 0.186014 | 0.801537 |
| 0 | 033 | 0.047267 | 0.963311 | 0.168377 |
| 0 | 034 | 0.937015 | 0.092265 | 0.518329 |
| 0 | 035 | 0.900982 | 0.578943 | 0.285882 |
| 0 | 036 | 0.189944 | 0.524061 | 0.132285 |
| 0 | 037 | 0.702755 | 0.942560 | 0.500618 |
| 0 | 038 | 0.579619 | 0.703015 | 0.836480 |
| 0 | 039 | 0.098836 | 0.179320 | 0.624142 |
| 0 | 040 | 0.150392 | 0.519317 | 0.465820 |
| 0 | 041 | 0.368381 | 0.266580 | 0.829793 |
| 0 | 042 | 0.251553 | 0.036697 | 0.177554 |
| 0 | 043 | 0.752371 | 0.509836 | 0.952103 |
| 0 | 044 | 0.809717 | 0.849498 | 0.796546 |
| 0 | 045 | 0.035890 | 0.595872 | 0.167530 |
| 0 | 046 | 0.920923 | 0.367864 | 0.513060 |
| 0 | 047 | 0.422683 | 0.844739 | 0.290467 |
| 0 | 048 | 0.480680 | 0.183364 | 0.130693 |
| 0 | 049 | 0.905639 | 0.709019 | 0.439842 |
| 0 | 050 | 0.692319 | 0.614455 | 0.086681 |
| 0 | 051 | 0.168066 | 0.581762 | 0.309036 |
| 0 | 052 | 0.500825 | 0.858945 | 0.467597 |
| 0 | 053 | 0.582758 | 0.057720 | 0.751312 |
| 0 | 054 | 0.365310 | 0.955556 | 0.424389 |
| 0 | 055 | 0.821935 | 0.912192 | 0.641213 |
| 0 | 056 | 0.168120 | 0.198834 | 0.803279 |
| 0 | 057 | 0.253766 | 0.390085 | 0.100533 |
| 0 | 058 | 0.023148 | 0.280662 | 0.751374 |
| 0 | 059 | 0.494129 | 0.249314 | 0.975424 |
| 0 | 060 | 0.839482 | 0.529891 | 0.128794 |
| 0 | 061 | 0.272567 | 0.718866 | 0.430610 |
| 0 | 062 | 0.389338 | 0.593229 | 0.089200 |
| 0 | 063 | 0.423615 | 0.103886 | 0.307688 |
| 0 | 064 | 0.133509 | 0.153549 | 0.466054 |
| 0 | 065 | 0.940712 | 0.047498 | 0.760216 |

|    |       |          |          |          |
|----|-------|----------|----------|----------|
| O  | O66   | 0.056497 | 0.923468 | 0.417465 |
| O  | O67   | 0.093067 | 0.439809 | 0.643140 |
| O  | O68   | 0.799878 | 0.490701 | 0.796092 |
| O  | O69   | 0.611438 | 0.381455 | 0.095546 |
| O  | O70   | 0.717812 | 0.261826 | 0.753555 |
| O  | O71   | 0.744872 | 0.763582 | 0.971597 |
| O  | O72   | 0.468311 | 0.821798 | 0.134752 |
| O  | O73   | 0.288973 | 0.085980 | 0.427752 |
| O  | O74   | 0.407290 | 0.311411 | 0.091822 |
| O  | O75   | 0.889290 | 0.821985 | 0.302976 |
| O  | O76   | 0.839800 | 0.484944 | 0.459978 |
| O  | O77   | 0.951995 | 0.413543 | 0.759925 |
| O  | O78   | 0.067060 | 0.636200 | 0.419133 |
| O  | O79   | 0.561882 | 0.184043 | 0.642105 |
| O  | O80   | 0.507133 | 0.833496 | 0.804595 |
| O  | O81   | 0.622518 | 0.747954 | 0.099699 |
| O  | O82   | 0.736430 | 0.977690 | 0.757015 |
| O  | O83   | 0.235236 | 0.501234 | 0.976953 |
| O  | O84   | 0.176599 | 0.160341 | 0.130594 |
| O  | O85   | 0.794650 | 0.661371 | 0.602318 |
| Al | Al86  | 0.929302 | 0.606755 | 0.399911 |
| Al | Al87  | 0.597776 | 0.941567 | 0.734822 |
| Al | Al88  | 0.268980 | 0.276977 | 0.070615 |
| Al | Al89  | 0.389820 | 0.845015 | 0.402810 |
| Al | Al90  | 0.057019 | 0.175569 | 0.734570 |
| Al | Al91  | 0.725499 | 0.509888 | 0.066451 |
| Al | Al92  | 0.153920 | 0.059582 | 0.400464 |
| Al | Al93  | 0.823772 | 0.399699 | 0.732196 |
| Al | Al94  | 0.493742 | 0.732026 | 0.070970 |
| Al | Al95  | 0.060493 | 0.405144 | 0.530497 |
| Al | Al96  | 0.717088 | 0.734701 | 0.859563 |
| Al | Al97  | 0.389194 | 0.069651 | 0.195559 |
| Al | Al98  | 0.593485 | 0.170043 | 0.531255 |
| Al | Al99  | 0.263786 | 0.503778 | 0.863925 |
| Al | Al100 | 0.931051 | 0.834014 | 0.195437 |
| Al | Al101 | 0.830224 | 0.951517 | 0.527479 |
| Al | Al102 | 0.494957 | 0.278614 | 0.863067 |
| Al | Al103 | 0.164812 | 0.613543 | 0.196742 |
| Si | Si104 | 0.925873 | 0.830286 | 0.405653 |
| P  | P105  | 0.061381 | 0.178114 | 0.527465 |
| P  | P106  | 0.720706 | 0.508967 | 0.854765 |
| P  | P107  | 0.390668 | 0.843337 | 0.192747 |
| P  | P108  | 0.825733 | 0.393209 | 0.523079 |
| P  | P109  | 0.489160 | 0.732798 | 0.858912 |

|   |      |          |          |          |
|---|------|----------|----------|----------|
| P | P110 | 0.158172 | 0.064665 | 0.192254 |
| P | P111 | 0.595485 | 0.938283 | 0.528625 |
| P | P112 | 0.269154 | 0.279380 | 0.858065 |
| P | P113 | 0.935779 | 0.610068 | 0.188777 |
| P | P114 | 0.595878 | 0.172401 | 0.737095 |
| P | P115 | 0.267416 | 0.502608 | 0.074652 |
| P | P116 | 0.163626 | 0.614269 | 0.405683 |
| P | P117 | 0.827174 | 0.947343 | 0.738335 |
| P | P118 | 0.498168 | 0.281478 | 0.073490 |
| P | P119 | 0.389574 | 0.074559 | 0.405137 |
| P | P120 | 0.053815 | 0.402702 | 0.738758 |
| P | P121 | 0.721670 | 0.735777 | 0.070689 |

***TS-Methylation-MeOH-C3-Si-AlPO-34***

|                                |     |                    |          |          |
|--------------------------------|-----|--------------------|----------|----------|
| data_                          |     |                    |          |          |
| _audit_creation_method         |     | 'Materials Studio' |          |          |
| _cell_length_a                 |     | 13.885913          |          |          |
| _cell_length_b                 |     | 13.885913          |          |          |
| _cell_length_c                 |     | 15.094859          |          |          |
| _cell_angle_alpha              |     | 90.000000          |          |          |
| _cell_angle_beta               |     | 90.000000          |          |          |
| _cell_angle_gamma              |     | 120.000000         |          |          |
| _symmetry_space_group_name_H-M |     | 'P1'               |          |          |
| loop_                          |     |                    |          |          |
| _atom_site_type_symbol         |     |                    |          |          |
| _atom_site_label               |     |                    |          |          |
| _atom_site_fract_x             |     |                    |          |          |
| _atom_site_fract_y             |     |                    |          |          |
| _atom_site_fract_z             |     |                    |          |          |
| H                              | H1  | 0.832592           | 0.677507 | 0.542763 |
| H                              | H2  | 0.620254           | 0.543523 | 0.656537 |
| H                              | H3  | 0.649214           | 0.493760 | 0.550926 |
| H                              | H4  | 0.608873           | 0.603406 | 0.548891 |
| H                              | H5  | 0.802745           | 0.735046 | 0.617186 |
| H                              | H6  | 0.461948           | 0.357493 | 0.639834 |
| H                              | H7  | 0.419523           | 0.464373 | 0.641393 |
| H                              | H8  | 0.455934           | 0.351611 | 0.479071 |
| H                              | H9  | 0.320618           | 0.411235 | 0.424055 |
| H                              | H10 | 0.458067           | 0.515603 | 0.403941 |
| H                              | H11 | 0.382919           | 0.529357 | 0.494922 |
| C                              | C12 | 0.620985           | 0.543280 | 0.585067 |
| C                              | C13 | 0.446778           | 0.415900 | 0.603265 |

|   |     |          |          |          |
|---|-----|----------|----------|----------|
| C | C14 | 0.435810 | 0.408510 | 0.513301 |
| C | C15 | 0.398256 | 0.471223 | 0.457169 |
| O | O16 | 0.079920 | 0.293753 | 0.504422 |
| O | O17 | 0.299013 | 0.400456 | 0.840446 |
| O | O18 | 0.821166 | 0.427667 | 0.619484 |
| O | O19 | 0.486100 | 0.157516 | 0.463791 |
| O | O20 | 0.728435 | 0.618981 | 0.828305 |
| O | O21 | 0.966940 | 0.729998 | 0.169828 |
| O | O22 | 0.493170 | 0.761848 | 0.958003 |
| O | O23 | 0.147075 | 0.477616 | 0.802466 |
| O | O24 | 0.404544 | 0.955354 | 0.167051 |
| O | O25 | 0.612469 | 0.055933 | 0.521104 |
| O | O26 | 0.159674 | 0.100873 | 0.288669 |
| O | O27 | 0.824468 | 0.815773 | 0.122738 |
| O | O28 | 0.715664 | 0.288959 | 0.499769 |
| O | O29 | 0.599463 | 0.415374 | 0.840160 |
| O | O30 | 0.564476 | 0.896189 | 0.624616 |
| O | O31 | 0.847643 | 0.858025 | 0.467796 |
| O | O32 | 0.375443 | 0.633284 | 0.835391 |
| O | O33 | 0.269298 | 0.751760 | 0.177627 |
| O | O34 | 0.242899 | 0.251114 | 0.956766 |
| O | O35 | 0.518031 | 0.185643 | 0.801275 |
| O | O36 | 0.047907 | 0.962950 | 0.168087 |
| O | O37 | 0.937021 | 0.092148 | 0.517293 |
| O | O38 | 0.900953 | 0.578495 | 0.286289 |
| O | O39 | 0.190420 | 0.523222 | 0.133394 |
| O | O40 | 0.702494 | 0.941924 | 0.501029 |
| O | O41 | 0.579130 | 0.702607 | 0.837478 |
| O | O42 | 0.097613 | 0.177864 | 0.624242 |
| O | O43 | 0.150150 | 0.518846 | 0.466247 |
| O | O44 | 0.367844 | 0.265985 | 0.830170 |
| O | O45 | 0.252105 | 0.036483 | 0.178373 |
| O | O46 | 0.754270 | 0.511169 | 0.952024 |
| O | O47 | 0.809072 | 0.848881 | 0.796482 |
| O | O48 | 0.036076 | 0.595099 | 0.168249 |
| O | O49 | 0.920542 | 0.367257 | 0.512674 |
| O | O50 | 0.421929 | 0.843868 | 0.290990 |
| O | O51 | 0.481237 | 0.183009 | 0.130951 |
| O | O52 | 0.905539 | 0.708976 | 0.440063 |
| O | O53 | 0.692374 | 0.613606 | 0.087081 |
| O | O54 | 0.168944 | 0.581940 | 0.309637 |
| O | O55 | 0.500780 | 0.858739 | 0.467643 |
| O | O56 | 0.582527 | 0.057196 | 0.752457 |
| O | O57 | 0.364325 | 0.954854 | 0.424645 |

|    |       |          |          |          |
|----|-------|----------|----------|----------|
| O  | 058   | 0.822598 | 0.912198 | 0.641169 |
| O  | 059   | 0.167657 | 0.198923 | 0.803750 |
| O  | 060   | 0.254856 | 0.389955 | 0.101084 |
| O  | 061   | 0.022541 | 0.280164 | 0.751108 |
| O  | 062   | 0.493051 | 0.247194 | 0.975286 |
| O  | 063   | 0.839843 | 0.529485 | 0.129092 |
| O  | 064   | 0.272734 | 0.718372 | 0.431738 |
| O  | 065   | 0.389613 | 0.593167 | 0.089173 |
| O  | 066   | 0.424318 | 0.103406 | 0.307947 |
| O  | 067   | 0.134128 | 0.154414 | 0.465942 |
| O  | 068   | 0.940392 | 0.047111 | 0.760707 |
| O  | 069   | 0.056417 | 0.923722 | 0.418697 |
| O  | 070   | 0.092177 | 0.439963 | 0.643602 |
| O  | 071   | 0.799120 | 0.490338 | 0.795618 |
| O  | 072   | 0.612210 | 0.380501 | 0.094200 |
| O  | 073   | 0.717619 | 0.261234 | 0.754441 |
| O  | 074   | 0.745365 | 0.762697 | 0.971780 |
| O  | 075   | 0.469072 | 0.821427 | 0.135747 |
| O  | 076   | 0.289151 | 0.086220 | 0.427302 |
| O  | 077   | 0.408122 | 0.311222 | 0.091834 |
| O  | 078   | 0.890365 | 0.822595 | 0.303100 |
| O  | 079   | 0.840182 | 0.485387 | 0.460773 |
| O  | 080   | 0.951641 | 0.413182 | 0.760953 |
| O  | 081   | 0.067293 | 0.636247 | 0.419301 |
| O  | 082   | 0.562588 | 0.183088 | 0.642280 |
| O  | 083   | 0.506813 | 0.832939 | 0.804612 |
| O  | 084   | 0.622811 | 0.747334 | 0.099669 |
| O  | 085   | 0.736128 | 0.977189 | 0.756592 |
| O  | 086   | 0.234589 | 0.500426 | 0.977685 |
| O  | 087   | 0.177495 | 0.160282 | 0.131027 |
| O  | 088   | 0.795452 | 0.663778 | 0.601479 |
| Al | Al89  | 0.929392 | 0.606655 | 0.400251 |
| Al | Al90  | 0.597383 | 0.941198 | 0.735021 |
| Al | Al91  | 0.269720 | 0.276721 | 0.070734 |
| Al | Al92  | 0.389471 | 0.844734 | 0.403305 |
| Al | Al93  | 0.056746 | 0.175204 | 0.734830 |
| Al | Al94  | 0.726160 | 0.509514 | 0.066247 |
| Al | Al95  | 0.153961 | 0.059600 | 0.400815 |
| Al | Al96  | 0.823369 | 0.398945 | 0.732678 |
| Al | Al97  | 0.494166 | 0.731981 | 0.071215 |
| Al | Al98  | 0.059926 | 0.404861 | 0.531076 |
| Al | Al99  | 0.716685 | 0.734165 | 0.859764 |
| Al | Al100 | 0.389824 | 0.069332 | 0.195841 |
| Al | Al101 | 0.593613 | 0.169991 | 0.531278 |

|    |       |          |          |          |
|----|-------|----------|----------|----------|
| Al | Al102 | 0.263505 | 0.503311 | 0.864577 |
| Al | Al103 | 0.931664 | 0.833777 | 0.195450 |
| Al | Al104 | 0.830235 | 0.951504 | 0.527432 |
| Al | Al105 | 0.494352 | 0.277934 | 0.863035 |
| Al | Al106 | 0.165203 | 0.613103 | 0.197194 |
| Si | Si107 | 0.926029 | 0.830467 | 0.405936 |
| P  | P108  | 0.061280 | 0.177933 | 0.527522 |
| P  | P109  | 0.720667 | 0.508829 | 0.855001 |
| P  | P110  | 0.390824 | 0.842796 | 0.193087 |
| P  | P111  | 0.825574 | 0.392917 | 0.523252 |
| P  | P112  | 0.488860 | 0.732732 | 0.859578 |
| P  | P113  | 0.158582 | 0.064339 | 0.192501 |
| P  | P114  | 0.595407 | 0.938305 | 0.528624 |
| P  | P115  | 0.268959 | 0.279143 | 0.858449 |
| P  | P116  | 0.936023 | 0.609536 | 0.189196 |
| P  | P117  | 0.595757 | 0.171819 | 0.737531 |
| P  | P118  | 0.267711 | 0.502152 | 0.075144 |
| P  | P119  | 0.163780 | 0.614110 | 0.406271 |
| P  | P120  | 0.827031 | 0.946983 | 0.738394 |
| P  | P121  | 0.498477 | 0.280588 | 0.073119 |
| P  | P122  | 0.389550 | 0.074193 | 0.405292 |
| P  | P123  | 0.053333 | 0.402332 | 0.739246 |
| P  | P124  | 0.721920 | 0.734961 | 0.070850 |

***TS-Methylation-MeOH-C4-iso-Si-ALPO-34***

|                                |    |                    |          |          |
|--------------------------------|----|--------------------|----------|----------|
| data_                          |    |                    |          |          |
| _audit_creation_method         |    | 'Materials Studio' |          |          |
| _cell_length_a                 |    | 13.885913          |          |          |
| _cell_length_b                 |    | 13.885913          |          |          |
| _cell_length_c                 |    | 15.094859          |          |          |
| _cell_angle_alpha              |    | 90.000000          |          |          |
| _cell_angle_beta               |    | 90.000000          |          |          |
| _cell_angle_gamma              |    | 120.000000         |          |          |
| _symmetry_space_group_name_H-M |    | 'P1'               |          |          |
| loop_                          |    |                    |          |          |
| _atom_site_type_symbol         |    |                    |          |          |
| _atom_site_label               |    |                    |          |          |
| _atom_site_fract_x             |    |                    |          |          |
| _atom_site_fract_y             |    |                    |          |          |
| _atom_site_fract_z             |    |                    |          |          |
| H                              | H1 | 0.845026           | 0.679749 | 0.554445 |
| H                              | H2 | 0.615938           | 0.570957 | 0.640682 |



|   |     |          |          |          |
|---|-----|----------|----------|----------|
| H | H3  | 0.658134 | 0.515530 | 0.545022 |
| H | H4  | 0.652289 | 0.646308 | 0.532322 |
| H | H5  | 0.818347 | 0.736231 | 0.632360 |
| H | H6  | 0.397552 | 0.550510 | 0.368344 |
| H | H7  | 0.541706 | 0.638155 | 0.380499 |
| H | H8  | 0.449941 | 0.633140 | 0.465482 |
| H | H9  | 0.507831 | 0.356946 | 0.434268 |
| H | H10 | 0.563533 | 0.466890 | 0.354455 |
| H | H11 | 0.420440 | 0.370167 | 0.355588 |
| H | H12 | 0.450929 | 0.395211 | 0.576706 |
| H | H13 | 0.431037 | 0.516692 | 0.589537 |
| C | C14 | 0.639562 | 0.576275 | 0.571937 |
| C | C15 | 0.458387 | 0.470623 | 0.548514 |
| C | C16 | 0.471364 | 0.489255 | 0.458989 |
| C | C17 | 0.465164 | 0.583767 | 0.417290 |
| C | C18 | 0.493214 | 0.416783 | 0.398647 |
| O | O19 | 0.069023 | 0.284479 | 0.509307 |
| O | O20 | 0.291544 | 0.392570 | 0.846261 |
| O | O21 | 0.814902 | 0.423226 | 0.624834 |
| O | O22 | 0.479223 | 0.147414 | 0.468699 |
| O | O23 | 0.724169 | 0.613488 | 0.834725 |
| O | O24 | 0.958949 | 0.723099 | 0.174255 |
| O | O25 | 0.486054 | 0.751968 | 0.963079 |
| O | O26 | 0.140507 | 0.471089 | 0.807347 |
| O | O27 | 0.396862 | 0.948381 | 0.173788 |
| O | O28 | 0.609927 | 0.050140 | 0.524586 |
| O | O29 | 0.156450 | 0.096710 | 0.294098 |
| O | O30 | 0.816784 | 0.809853 | 0.128615 |
| O | O31 | 0.708072 | 0.282734 | 0.506363 |
| O | O32 | 0.592776 | 0.409944 | 0.845624 |
| O | O33 | 0.554835 | 0.890758 | 0.630489 |
| O | O34 | 0.838950 | 0.848054 | 0.473551 |
| O | O35 | 0.369217 | 0.625638 | 0.839163 |
| O | O36 | 0.261754 | 0.744614 | 0.183067 |
| O | O37 | 0.233852 | 0.242381 | 0.961775 |
| O | O38 | 0.512951 | 0.180327 | 0.806859 |
| O | O39 | 0.039190 | 0.956234 | 0.176823 |
| O | O40 | 0.927899 | 0.082718 | 0.521842 |
| O | O41 | 0.893068 | 0.572943 | 0.291884 |
| O | O42 | 0.181538 | 0.515805 | 0.137235 |
| O | O43 | 0.692984 | 0.928977 | 0.508627 |
| O | O44 | 0.573070 | 0.695591 | 0.841525 |
| O | O45 | 0.088008 | 0.169184 | 0.629079 |
| O | O46 | 0.143375 | 0.510545 | 0.470663 |

|   |     |          |          |          |
|---|-----|----------|----------|----------|
| 0 | 047 | 0.360375 | 0.257999 | 0.836281 |
| 0 | 048 | 0.243589 | 0.028741 | 0.181945 |
| 0 | 049 | 0.746205 | 0.503640 | 0.958497 |
| 0 | 050 | 0.803476 | 0.842458 | 0.803300 |
| 0 | 051 | 0.028332 | 0.588442 | 0.174329 |
| 0 | 052 | 0.913301 | 0.361376 | 0.518348 |
| 0 | 053 | 0.415760 | 0.835061 | 0.295608 |
| 0 | 054 | 0.473042 | 0.175723 | 0.135770 |
| 0 | 055 | 0.902216 | 0.703149 | 0.447381 |
| 0 | 056 | 0.685451 | 0.607242 | 0.093928 |
| 0 | 057 | 0.162663 | 0.573652 | 0.313991 |
| 0 | 058 | 0.493040 | 0.852396 | 0.473132 |
| 0 | 059 | 0.577487 | 0.050835 | 0.761447 |
| 0 | 060 | 0.355330 | 0.946202 | 0.427036 |
| 0 | 061 | 0.818577 | 0.904000 | 0.647403 |
| 0 | 062 | 0.160692 | 0.191462 | 0.808165 |
| 0 | 063 | 0.246246 | 0.382414 | 0.105681 |
| 0 | 064 | 0.015791 | 0.273669 | 0.756250 |
| 0 | 065 | 0.487313 | 0.242699 | 0.980639 |
| 0 | 066 | 0.831826 | 0.521964 | 0.135128 |
| 0 | 067 | 0.266203 | 0.710077 | 0.436039 |
| 0 | 068 | 0.381614 | 0.585740 | 0.096384 |
| 0 | 069 | 0.414976 | 0.097871 | 0.312962 |
| 0 | 070 | 0.125280 | 0.146572 | 0.470964 |
| 0 | 071 | 0.933306 | 0.040704 | 0.767041 |
| 0 | 072 | 0.048174 | 0.917769 | 0.421516 |
| 0 | 073 | 0.085714 | 0.433191 | 0.648395 |
| 0 | 074 | 0.792858 | 0.483101 | 0.802634 |
| 0 | 075 | 0.603318 | 0.374321 | 0.101648 |
| 0 | 076 | 0.711627 | 0.254827 | 0.758038 |
| 0 | 077 | 0.736064 | 0.755462 | 0.978156 |
| 0 | 078 | 0.461037 | 0.814989 | 0.139219 |
| 0 | 079 | 0.281449 | 0.078102 | 0.434516 |
| 0 | 080 | 0.399034 | 0.303272 | 0.097290 |
| 0 | 081 | 0.879263 | 0.810212 | 0.308988 |
| 0 | 082 | 0.832404 | 0.478470 | 0.465509 |
| 0 | 083 | 0.945263 | 0.407059 | 0.765568 |
| 0 | 084 | 0.060724 | 0.627886 | 0.423410 |
| 0 | 085 | 0.554432 | 0.171061 | 0.647847 |
| 0 | 086 | 0.500225 | 0.825832 | 0.810626 |
| 0 | 087 | 0.614592 | 0.739834 | 0.106984 |
| 0 | 088 | 0.728866 | 0.968550 | 0.760334 |
| 0 | 089 | 0.229359 | 0.495126 | 0.982277 |
| 0 | 090 | 0.168209 | 0.152423 | 0.135954 |

|    |       |          |          |          |
|----|-------|----------|----------|----------|
| O  | O91   | 0.805913 | 0.664185 | 0.612594 |
| Al | Al92  | 0.923188 | 0.599594 | 0.405677 |
| Al | Al93  | 0.590236 | 0.934272 | 0.741054 |
| Al | Al94  | 0.260697 | 0.268752 | 0.075511 |
| Al | Al95  | 0.382092 | 0.837136 | 0.407598 |
| Al | Al96  | 0.049574 | 0.168447 | 0.739943 |
| Al | Al97  | 0.718048 | 0.502351 | 0.072460 |
| Al | Al98  | 0.147495 | 0.053674 | 0.406088 |
| Al | Al99  | 0.816885 | 0.393023 | 0.737803 |
| Al | Al100 | 0.486245 | 0.724142 | 0.076636 |
| Al | Al101 | 0.052515 | 0.397417 | 0.536090 |
| Al | Al102 | 0.710124 | 0.727250 | 0.865771 |
| Al | Al103 | 0.381391 | 0.062365 | 0.200895 |
| Al | Al104 | 0.587056 | 0.161897 | 0.536694 |
| Al | Al105 | 0.257040 | 0.496158 | 0.869004 |
| Al | Al106 | 0.923153 | 0.826067 | 0.201555 |
| Al | Al107 | 0.822658 | 0.942179 | 0.533660 |
| Al | Al108 | 0.488055 | 0.272283 | 0.867892 |
| Al | Al109 | 0.157535 | 0.605787 | 0.201970 |
| Si | Si110 | 0.918466 | 0.822399 | 0.411226 |
| P  | P111  | 0.052032 | 0.169474 | 0.532376 |
| P  | P112  | 0.714116 | 0.502259 | 0.861055 |
| P  | P113  | 0.383440 | 0.835517 | 0.198124 |
| P  | P114  | 0.818238 | 0.386861 | 0.528966 |
| P  | P115  | 0.482299 | 0.724728 | 0.864272 |
| P  | P116  | 0.151149 | 0.057721 | 0.198143 |
| P  | P117  | 0.588055 | 0.930966 | 0.534323 |
| P  | P118  | 0.261389 | 0.271219 | 0.863611 |
| P  | P119  | 0.928185 | 0.602873 | 0.194644 |
| P  | P120  | 0.589604 | 0.164516 | 0.743388 |
| P  | P121  | 0.259964 | 0.495085 | 0.080082 |
| P  | P122  | 0.157245 | 0.605709 | 0.410638 |
| P  | P123  | 0.820967 | 0.939658 | 0.744266 |
| P  | P124  | 0.490441 | 0.274000 | 0.078670 |
| P  | P125  | 0.381469 | 0.066392 | 0.410332 |
| P  | P126  | 0.046790 | 0.395859 | 0.744069 |
| P  | P127  | 0.713940 | 0.728210 | 0.077328 |

***TS-Methylation-MeOH-C6-Si-ALPO-34***

data\_  
\_audit\_creation\_method 'Materials Studio'  
\_cell\_length\_a 13.885913

|                                |     |            |          |          |
|--------------------------------|-----|------------|----------|----------|
| _cell_length_b                 |     | 13.885913  |          |          |
| _cell_length_c                 |     | 15.094859  |          |          |
| _cell_angle_alpha              |     | 90.000000  |          |          |
| _cell_angle_beta               |     | 90.000000  |          |          |
| _cell_angle_gamma              |     | 120.000000 |          |          |
| _symmetry_space_group_name_H-M |     | 'P1'       |          |          |
| loop_                          |     |            |          |          |
| _atom_site_type_symbol         |     |            |          |          |
| _atom_site_label               |     |            |          |          |
| _atom_site_fract_x             |     |            |          |          |
| _atom_site_fract_y             |     |            |          |          |
| _atom_site_fract_z             |     |            |          |          |
| H                              | H1  | 0.845529   | 0.679216 | 0.552269 |
| H                              | H2  | 0.613645   | 0.573210 | 0.629697 |
| H                              | H3  | 0.657800   | 0.515842 | 0.536785 |
| H                              | H4  | 0.655953   | 0.648598 | 0.521589 |
| H                              | H5  | 0.815436   | 0.733898 | 0.629411 |
| H                              | H6  | 0.399703   | 0.551255 | 0.374256 |
| H                              | H7  | 0.545067   | 0.636224 | 0.380153 |
| H                              | H8  | 0.459652   | 0.641834 | 0.465231 |
| H                              | H9  | 0.526266   | 0.369859 | 0.433747 |
| H                              | H10 | 0.559394   | 0.474079 | 0.352504 |
| H                              | H11 | 0.421045   | 0.366199 | 0.366184 |
| H                              | H12 | 0.467410   | 0.373567 | 0.659620 |
| H                              | H13 | 0.458472   | 0.313116 | 0.554003 |
| H                              | H14 | 0.339099   | 0.301800 | 0.604583 |
| H                              | H15 | 0.317046   | 0.493382 | 0.601643 |
| H                              | H16 | 0.447729   | 0.615828 | 0.598754 |
| H                              | H17 | 0.418305   | 0.514404 | 0.681458 |
| C                              | C18 | 0.428515   | 0.357790 | 0.594071 |
| C                              | C19 | 0.406430   | 0.526599 | 0.611604 |
| C                              | C20 | 0.640845   | 0.578392 | 0.562115 |
| C                              | C21 | 0.445717   | 0.464405 | 0.553107 |
| C                              | C22 | 0.474727   | 0.492102 | 0.465301 |
| C                              | C23 | 0.470494   | 0.586750 | 0.420394 |
| C                              | C24 | 0.497982   | 0.421853 | 0.402262 |
| O                              | O25 | 0.069481   | 0.284660 | 0.509442 |
| O                              | O26 | 0.291944   | 0.392904 | 0.846472 |
| O                              | O27 | 0.815359   | 0.422954 | 0.624894 |
| O                              | O28 | 0.479930   | 0.145946 | 0.468535 |
| O                              | O29 | 0.723536   | 0.612988 | 0.835220 |
| O                              | O30 | 0.959262   | 0.723158 | 0.174608 |
| O                              | O31 | 0.485962   | 0.752478 | 0.963267 |
| O                              | O32 | 0.140624   | 0.470853 | 0.806959 |

|   |     |          |          |          |
|---|-----|----------|----------|----------|
| 0 | 033 | 0.396709 | 0.948257 | 0.173004 |
| 0 | 034 | 0.612569 | 0.050871 | 0.525286 |
| 0 | 035 | 0.157249 | 0.097425 | 0.294086 |
| 0 | 036 | 0.816828 | 0.809597 | 0.128744 |
| 0 | 037 | 0.707723 | 0.283296 | 0.506137 |
| 0 | 038 | 0.592534 | 0.409323 | 0.846010 |
| 0 | 039 | 0.555241 | 0.890304 | 0.630409 |
| 0 | 040 | 0.840940 | 0.848851 | 0.473893 |
| 0 | 041 | 0.368808 | 0.625647 | 0.839654 |
| 0 | 042 | 0.261607 | 0.744560 | 0.182994 |
| 0 | 043 | 0.232905 | 0.242243 | 0.961817 |
| 0 | 044 | 0.512345 | 0.179857 | 0.806461 |
| 0 | 045 | 0.039258 | 0.956427 | 0.177210 |
| 0 | 046 | 0.928131 | 0.082956 | 0.522167 |
| 0 | 047 | 0.893470 | 0.572659 | 0.291977 |
| 0 | 048 | 0.181614 | 0.515702 | 0.137543 |
| 0 | 049 | 0.693062 | 0.927668 | 0.508365 |
| 0 | 050 | 0.572529 | 0.695036 | 0.842040 |
| 0 | 051 | 0.088571 | 0.169691 | 0.629284 |
| 0 | 052 | 0.143460 | 0.509973 | 0.470802 |
| 0 | 053 | 0.360507 | 0.258065 | 0.837047 |
| 0 | 054 | 0.243614 | 0.028761 | 0.181843 |
| 0 | 055 | 0.746455 | 0.503122 | 0.958511 |
| 0 | 056 | 0.803112 | 0.842083 | 0.803242 |
| 0 | 057 | 0.028409 | 0.588266 | 0.174251 |
| 0 | 058 | 0.912716 | 0.360747 | 0.517730 |
| 0 | 059 | 0.415245 | 0.835755 | 0.295716 |
| 0 | 060 | 0.473184 | 0.176082 | 0.136502 |
| 0 | 061 | 0.904126 | 0.704022 | 0.447026 |
| 0 | 062 | 0.685413 | 0.607259 | 0.093224 |
| 0 | 063 | 0.163034 | 0.573684 | 0.314146 |
| 0 | 064 | 0.493493 | 0.853639 | 0.473043 |
| 0 | 065 | 0.577399 | 0.050506 | 0.761556 |
| 0 | 066 | 0.353554 | 0.945047 | 0.427675 |
| 0 | 067 | 0.818711 | 0.904092 | 0.647455 |
| 0 | 068 | 0.161269 | 0.192040 | 0.807713 |
| 0 | 069 | 0.246283 | 0.382378 | 0.105789 |
| 0 | 070 | 0.015371 | 0.273346 | 0.756321 |
| 0 | 071 | 0.487589 | 0.241584 | 0.980938 |
| 0 | 072 | 0.831853 | 0.522165 | 0.135247 |
| 0 | 073 | 0.266798 | 0.709439 | 0.436599 |
| 0 | 074 | 0.381538 | 0.585677 | 0.095946 |
| 0 | 075 | 0.414609 | 0.096337 | 0.313103 |
| 0 | 076 | 0.125744 | 0.146731 | 0.471379 |

|    |       |          |          |          |
|----|-------|----------|----------|----------|
| O  | 077   | 0.933450 | 0.040383 | 0.767220 |
| O  | 078   | 0.049672 | 0.918415 | 0.420887 |
| O  | 079   | 0.084937 | 0.432601 | 0.648253 |
| O  | 080   | 0.792515 | 0.483017 | 0.802400 |
| O  | 081   | 0.603261 | 0.374391 | 0.101465 |
| O  | 082   | 0.711289 | 0.254631 | 0.758205 |
| O  | 083   | 0.736508 | 0.756255 | 0.978088 |
| O  | 084   | 0.461039 | 0.814707 | 0.139719 |
| O  | 085   | 0.282609 | 0.079488 | 0.435000 |
| O  | 086   | 0.398963 | 0.303074 | 0.096523 |
| O  | 087   | 0.879686 | 0.810612 | 0.309131 |
| O  | 088   | 0.832873 | 0.479054 | 0.465773 |
| O  | 089   | 0.945070 | 0.406915 | 0.765899 |
| O  | 090   | 0.061304 | 0.627718 | 0.423743 |
| O  | 091   | 0.554498 | 0.170442 | 0.647671 |
| O  | 092   | 0.500189 | 0.825526 | 0.810453 |
| O  | 093   | 0.614711 | 0.739931 | 0.106840 |
| O  | 094   | 0.729069 | 0.968663 | 0.760414 |
| O  | 095   | 0.228541 | 0.494620 | 0.982484 |
| O  | 096   | 0.168112 | 0.152356 | 0.135864 |
| O  | 097   | 0.803407 | 0.662208 | 0.609101 |
| Al | Al98  | 0.923958 | 0.599718 | 0.405612 |
| Al | Al99  | 0.590359 | 0.934065 | 0.741030 |
| Al | Al100 | 0.260587 | 0.268721 | 0.075544 |
| Al | Al101 | 0.381814 | 0.836992 | 0.407812 |
| Al | Al102 | 0.049394 | 0.168284 | 0.740143 |
| Al | Al103 | 0.718110 | 0.502345 | 0.072429 |
| Al | Al104 | 0.148574 | 0.054500 | 0.406008 |
| Al | Al105 | 0.816632 | 0.392809 | 0.737894 |
| Al | Al106 | 0.486263 | 0.724153 | 0.076792 |
| Al | Al107 | 0.051694 | 0.396948 | 0.535857 |
| Al | Al108 | 0.709814 | 0.727013 | 0.865874 |
| Al | Al109 | 0.381298 | 0.062084 | 0.200895 |
| Al | Al110 | 0.587909 | 0.161516 | 0.536695 |
| Al | Al111 | 0.256698 | 0.496059 | 0.869384 |
| Al | Al112 | 0.923303 | 0.826091 | 0.201667 |
| Al | Al113 | 0.823186 | 0.942122 | 0.533733 |
| Al | Al114 | 0.488022 | 0.271602 | 0.868403 |
| Al | Al115 | 0.157617 | 0.605731 | 0.202144 |
| Si | Si116 | 0.919921 | 0.823098 | 0.411056 |
| P  | P117  | 0.052244 | 0.169578 | 0.532546 |
| P  | P118  | 0.713883 | 0.501867 | 0.861220 |
| P  | P119  | 0.383245 | 0.835562 | 0.198075 |
| P  | P120  | 0.818165 | 0.386983 | 0.528862 |

|   |      |          |          |          |
|---|------|----------|----------|----------|
| P | P121 | 0.482057 | 0.724677 | 0.864586 |
| P | P122 | 0.151330 | 0.057908 | 0.198202 |
| P | P123 | 0.588902 | 0.930997 | 0.534337 |
| P | P124 | 0.261431 | 0.271403 | 0.863869 |
| P | P125 | 0.928370 | 0.602835 | 0.194735 |
| P | P126 | 0.589384 | 0.164114 | 0.743325 |
| P | P127 | 0.259831 | 0.494943 | 0.080208 |
| P | P128 | 0.157713 | 0.605401 | 0.410878 |
| P | P129 | 0.820971 | 0.939462 | 0.744331 |
| P | P130 | 0.490506 | 0.273813 | 0.078771 |
| P | P131 | 0.381403 | 0.065709 | 0.410561 |
| P | P132 | 0.046402 | 0.395552 | 0.744083 |
| P | P133 | 0.714078 | 0.728361 | 0.077173 |

***TS-Methylation-MeOH-CO-Si-AlPO-34***

|                                           |     |          |          |          |
|-------------------------------------------|-----|----------|----------|----------|
| data_                                     |     |          |          |          |
| _audit_creation_method 'Materials Studio' |     |          |          |          |
| _cell_length_a 13.885913                  |     |          |          |          |
| _cell_length_b 13.885913                  |     |          |          |          |
| _cell_length_c 15.094859                  |     |          |          |          |
| _cell_angle_alpha 90.000000               |     |          |          |          |
| _cell_angle_beta 90.000000                |     |          |          |          |
| _cell_angle_gamma 120.000000              |     |          |          |          |
| _symmetry_space_group_name_H-M 'P1'       |     |          |          |          |
| loop_                                     |     |          |          |          |
| _atom_site_type_symbol                    |     |          |          |          |
| _atom_site_label                          |     |          |          |          |
| _atom_site_fract_x                        |     |          |          |          |
| _atom_site_fract_y                        |     |          |          |          |
| _atom_site_fract_z                        |     |          |          |          |
| H                                         | H1  | 0.847274 | 0.687245 | 0.546075 |
| H                                         | H2  | 0.645694 | 0.566157 | 0.670943 |
| H                                         | H3  | 0.684184 | 0.497490 | 0.582956 |
| H                                         | H4  | 0.630731 | 0.592308 | 0.551271 |
| H                                         | H5  | 0.819015 | 0.747378 | 0.620109 |
| C                                         | C6  | 0.648113 | 0.547706 | 0.601661 |
| C                                         | C7  | 0.498630 | 0.422382 | 0.604538 |
| O                                         | O8  | 0.076286 | 0.292086 | 0.502458 |
| O                                         | O9  | 0.297030 | 0.399565 | 0.839510 |
| O                                         | O10 | 0.816301 | 0.426819 | 0.618612 |
| O                                         | O11 | 0.483646 | 0.155256 | 0.462749 |
| O                                         | O12 | 0.726035 | 0.618355 | 0.827671 |

|   |     |          |          |          |
|---|-----|----------|----------|----------|
| 0 | 013 | 0.963654 | 0.729621 | 0.168318 |
| 0 | 014 | 0.490608 | 0.759734 | 0.956414 |
| 0 | 015 | 0.145236 | 0.477303 | 0.801155 |
| 0 | 016 | 0.401035 | 0.954982 | 0.165634 |
| 0 | 017 | 0.611588 | 0.055591 | 0.521618 |
| 0 | 018 | 0.158127 | 0.101095 | 0.287573 |
| 0 | 019 | 0.821214 | 0.815740 | 0.122280 |
| 0 | 020 | 0.713541 | 0.288274 | 0.498297 |
| 0 | 021 | 0.596834 | 0.414659 | 0.836947 |
| 0 | 022 | 0.561657 | 0.894221 | 0.623448 |
| 0 | 023 | 0.846732 | 0.857680 | 0.467553 |
| 0 | 024 | 0.374041 | 0.632511 | 0.832746 |
| 0 | 025 | 0.266207 | 0.751342 | 0.176598 |
| 0 | 026 | 0.239420 | 0.249400 | 0.955363 |
| 0 | 027 | 0.516399 | 0.185058 | 0.800344 |
| 0 | 028 | 0.044121 | 0.962548 | 0.168153 |
| 0 | 029 | 0.933160 | 0.091344 | 0.517450 |
| 0 | 030 | 0.898093 | 0.578474 | 0.285133 |
| 0 | 031 | 0.186759 | 0.522964 | 0.130783 |
| 0 | 032 | 0.699705 | 0.939977 | 0.500029 |
| 0 | 033 | 0.577767 | 0.702619 | 0.835359 |
| 0 | 034 | 0.095071 | 0.177706 | 0.623007 |
| 0 | 035 | 0.146346 | 0.518068 | 0.464471 |
| 0 | 036 | 0.365513 | 0.264910 | 0.829348 |
| 0 | 037 | 0.248464 | 0.035701 | 0.176267 |
| 0 | 038 | 0.749291 | 0.508570 | 0.951362 |
| 0 | 039 | 0.807732 | 0.848486 | 0.795833 |
| 0 | 040 | 0.032983 | 0.594951 | 0.166781 |
| 0 | 041 | 0.918187 | 0.366192 | 0.514180 |
| 0 | 042 | 0.420163 | 0.843792 | 0.288944 |
| 0 | 043 | 0.477553 | 0.182373 | 0.129711 |
| 0 | 044 | 0.903939 | 0.708381 | 0.440087 |
| 0 | 045 | 0.689572 | 0.613623 | 0.085817 |
| 0 | 046 | 0.165231 | 0.580448 | 0.307637 |
| 0 | 047 | 0.498601 | 0.859270 | 0.466102 |
| 0 | 048 | 0.580747 | 0.056908 | 0.749964 |
| 0 | 049 | 0.361238 | 0.953328 | 0.422686 |
| 0 | 050 | 0.820690 | 0.910501 | 0.640385 |
| 0 | 051 | 0.165643 | 0.198282 | 0.801940 |
| 0 | 052 | 0.250787 | 0.389162 | 0.098742 |
| 0 | 053 | 0.020157 | 0.279733 | 0.750361 |
| 0 | 054 | 0.492471 | 0.248595 | 0.974368 |
| 0 | 055 | 0.836625 | 0.529007 | 0.128061 |
| 0 | 056 | 0.270600 | 0.717204 | 0.429220 |



|    |       |          |          |          |
|----|-------|----------|----------|----------|
| O  | O57   | 0.386466 | 0.592424 | 0.088479 |
| O  | O58   | 0.420395 | 0.102650 | 0.306835 |
| O  | O59   | 0.129054 | 0.151082 | 0.465018 |
| O  | O60   | 0.938195 | 0.046681 | 0.759517 |
| O  | O61   | 0.054381 | 0.922331 | 0.415482 |
| O  | O62   | 0.091423 | 0.439132 | 0.642204 |
| O  | O63   | 0.797032 | 0.489951 | 0.794906 |
| O  | O64   | 0.608394 | 0.380544 | 0.094883 |
| O  | O65   | 0.716064 | 0.260880 | 0.753897 |
| O  | O66   | 0.742845 | 0.763090 | 0.971144 |
| O  | O67   | 0.465483 | 0.821387 | 0.133027 |
| O  | O68   | 0.286170 | 0.084507 | 0.427378 |
| O  | O69   | 0.404246 | 0.310285 | 0.089969 |
| O  | O70   | 0.885770 | 0.819469 | 0.302412 |
| O  | O71   | 0.839155 | 0.484873 | 0.460100 |
| O  | O72   | 0.950436 | 0.413789 | 0.758646 |
| O  | O73   | 0.065531 | 0.636862 | 0.417282 |
| O  | O74   | 0.561772 | 0.184847 | 0.641107 |
| O  | O75   | 0.504930 | 0.832869 | 0.803763 |
| O  | O76   | 0.619670 | 0.747088 | 0.098776 |
| O  | O77   | 0.733832 | 0.975993 | 0.755174 |
| O  | O78   | 0.233136 | 0.501373 | 0.975597 |
| O  | O79   | 0.173419 | 0.159400 | 0.129707 |
| O  | O80   | 0.814742 | 0.676806 | 0.606704 |
| O  | O81   | 0.411912 | 0.348017 | 0.612258 |
| Al | Al82  | 0.927440 | 0.606205 | 0.398962 |
| Al | Al83  | 0.595142 | 0.940373 | 0.733484 |
| Al | Al84  | 0.265759 | 0.275757 | 0.069428 |
| Al | Al85  | 0.387127 | 0.843797 | 0.401291 |
| Al | Al86  | 0.054472 | 0.174894 | 0.733490 |
| Al | Al87  | 0.722445 | 0.508824 | 0.065984 |
| Al | Al88  | 0.151757 | 0.058884 | 0.399471 |
| Al | Al89  | 0.821654 | 0.398489 | 0.731874 |
| Al | Al90  | 0.490840 | 0.731083 | 0.070016 |
| Al | Al91  | 0.058453 | 0.404109 | 0.529713 |
| Al | Al92  | 0.714914 | 0.734276 | 0.859327 |
| Al | Al93  | 0.386098 | 0.068745 | 0.194742 |
| Al | Al94  | 0.591524 | 0.168978 | 0.530027 |
| Al | Al95  | 0.261978 | 0.502966 | 0.862728 |
| Al | Al96  | 0.928248 | 0.833035 | 0.194886 |
| Al | Al97  | 0.827665 | 0.950471 | 0.526625 |
| Al | Al98  | 0.492116 | 0.277122 | 0.862008 |
| Al | Al99  | 0.162089 | 0.612541 | 0.195480 |
| Si | Si100 | 0.923781 | 0.829401 | 0.404712 |

|   |      |          |          |          |
|---|------|----------|----------|----------|
| P | P101 | 0.057844 | 0.176690 | 0.526362 |
| P | P102 | 0.717836 | 0.507727 | 0.854124 |
| P | P103 | 0.387823 | 0.842546 | 0.191363 |
| P | P104 | 0.823319 | 0.391910 | 0.522525 |
| P | P105 | 0.486929 | 0.731997 | 0.857826 |
| P | P106 | 0.155364 | 0.063941 | 0.191456 |
| P | P107 | 0.593032 | 0.937221 | 0.527665 |
| P | P108 | 0.266415 | 0.278054 | 0.857280 |
| P | P109 | 0.933006 | 0.609304 | 0.187949 |
| P | P110 | 0.594200 | 0.171764 | 0.736247 |
| P | P111 | 0.264631 | 0.501870 | 0.073340 |
| P | P112 | 0.161194 | 0.613350 | 0.404202 |
| P | P113 | 0.825092 | 0.946223 | 0.737422 |
| P | P114 | 0.495303 | 0.280459 | 0.072419 |
| P | P115 | 0.386469 | 0.072876 | 0.404285 |
| P | P116 | 0.051920 | 0.402070 | 0.737697 |
| P | P117 | 0.718927 | 0.734987 | 0.070210 |

***TS-Methylation-MeOH-NH3-Si-AlPO-34***

|                                           |    |          |          |          |
|-------------------------------------------|----|----------|----------|----------|
| data_                                     |    |          |          |          |
| _audit_creation_method 'Materials Studio' |    |          |          |          |
| _cell_length_a 13.885913                  |    |          |          |          |
| _cell_length_b 13.885913                  |    |          |          |          |
| _cell_length_c 15.094859                  |    |          |          |          |
| _cell_angle_alpha 90.000000               |    |          |          |          |
| _cell_angle_beta 90.000000                |    |          |          |          |
| _cell_angle_gamma 120.000000              |    |          |          |          |
| _symmetry_space_group_name_H-M 'P1'       |    |          |          |          |
| loop_                                     |    |          |          |          |
| _atom_site_type_symbol                    |    |          |          |          |
| _atom_site_label                          |    |          |          |          |
| _atom_site_fract_x                        |    |          |          |          |
| _atom_site_fract_y                        |    |          |          |          |
| _atom_site_fract_z                        |    |          |          |          |
| H                                         | H1 | 0.855564 | 0.689486 | 0.545168 |
| H                                         | H2 | 0.656939 | 0.600934 | 0.667690 |
| H                                         | H3 | 0.669342 | 0.522039 | 0.573220 |
| H                                         | H4 | 0.658697 | 0.648493 | 0.551200 |
| H                                         | H5 | 0.840454 | 0.753721 | 0.624357 |
| H                                         | H6 | 0.460333 | 0.432398 | 0.641881 |
| H                                         | H7 | 0.457837 | 0.457148 | 0.535208 |
| H                                         | H8 | 0.453394 | 0.542054 | 0.609402 |

|   |     |          |          |          |
|---|-----|----------|----------|----------|
| C | C9  | 0.662997 | 0.591626 | 0.597527 |
| N | N10 | 0.487188 | 0.493495 | 0.595231 |
| O | O11 | 0.075837 | 0.292056 | 0.502386 |
| O | O12 | 0.296793 | 0.399799 | 0.839106 |
| O | O13 | 0.817654 | 0.428772 | 0.618394 |
| O | O14 | 0.483837 | 0.154091 | 0.462484 |
| O | O15 | 0.728399 | 0.619885 | 0.829019 |
| O | O16 | 0.964101 | 0.730074 | 0.167910 |
| O | O17 | 0.490298 | 0.758270 | 0.956319 |
| O | O18 | 0.145448 | 0.478150 | 0.801046 |
| O | O19 | 0.401142 | 0.954909 | 0.166041 |
| O | O20 | 0.612668 | 0.055876 | 0.520745 |
| O | O21 | 0.158783 | 0.101733 | 0.287559 |
| O | O22 | 0.821173 | 0.815963 | 0.122912 |
| O | O23 | 0.713612 | 0.288457 | 0.499147 |
| O | O24 | 0.597638 | 0.416178 | 0.838168 |
| O | O25 | 0.561266 | 0.895120 | 0.624028 |
| O | O26 | 0.846074 | 0.856453 | 0.467985 |
| O | O27 | 0.374837 | 0.632005 | 0.831696 |
| O | O28 | 0.266458 | 0.751274 | 0.177143 |
| O | O29 | 0.240459 | 0.249802 | 0.955005 |
| O | O30 | 0.517585 | 0.186022 | 0.800824 |
| O | O31 | 0.044196 | 0.962873 | 0.168576 |
| O | O32 | 0.933315 | 0.090898 | 0.516186 |
| O | O33 | 0.899077 | 0.579765 | 0.285260 |
| O | O34 | 0.186665 | 0.522888 | 0.130741 |
| O | O35 | 0.699321 | 0.938462 | 0.501196 |
| O | O36 | 0.578670 | 0.702841 | 0.835007 |
| O | O37 | 0.093874 | 0.177337 | 0.623031 |
| O | O38 | 0.147211 | 0.517884 | 0.464656 |
| O | O39 | 0.366366 | 0.266127 | 0.828466 |
| O | O40 | 0.248562 | 0.035819 | 0.176104 |
| O | O41 | 0.750680 | 0.508927 | 0.951870 |
| O | O42 | 0.808813 | 0.848601 | 0.795912 |
| O | O43 | 0.033263 | 0.595248 | 0.166718 |
| O | O44 | 0.918191 | 0.367032 | 0.513935 |
| O | O45 | 0.421212 | 0.843521 | 0.288855 |
| O | O46 | 0.477590 | 0.182292 | 0.129213 |
| O | O47 | 0.905889 | 0.709266 | 0.440805 |
| O | O48 | 0.689989 | 0.614009 | 0.085567 |
| O | O49 | 0.165035 | 0.579871 | 0.307702 |
| O | O50 | 0.498523 | 0.858867 | 0.466708 |
| O | O51 | 0.582231 | 0.057386 | 0.752701 |
| O | O52 | 0.360787 | 0.952590 | 0.421730 |

|    |      |          |          |          |
|----|------|----------|----------|----------|
| 0  | 053  | 0.823447 | 0.911652 | 0.640715 |
| 0  | 054  | 0.166125 | 0.198487 | 0.801684 |
| 0  | 055  | 0.250357 | 0.388937 | 0.098244 |
| 0  | 056  | 0.020570 | 0.280358 | 0.750859 |
| 0  | 057  | 0.491845 | 0.249130 | 0.974128 |
| 0  | 058  | 0.836660 | 0.529167 | 0.128596 |
| 0  | 059  | 0.271268 | 0.716775 | 0.428977 |
| 0  | 060  | 0.386497 | 0.592182 | 0.089118 |
| 0  | 061  | 0.420451 | 0.102861 | 0.306578 |
| 0  | 062  | 0.130102 | 0.152132 | 0.465242 |
| 0  | 063  | 0.938677 | 0.047299 | 0.760732 |
| 0  | 064  | 0.054247 | 0.923509 | 0.415990 |
| 0  | 065  | 0.092001 | 0.439127 | 0.642122 |
| 0  | 066  | 0.797812 | 0.490433 | 0.795467 |
| 0  | 067  | 0.608423 | 0.380690 | 0.094788 |
| 0  | 068  | 0.716691 | 0.261499 | 0.752980 |
| 0  | 069  | 0.742900 | 0.764491 | 0.971685 |
| 0  | 070  | 0.465400 | 0.821433 | 0.132507 |
| 0  | 071  | 0.286344 | 0.084150 | 0.427301 |
| 0  | 072  | 0.404298 | 0.310491 | 0.090522 |
| 0  | 073  | 0.886082 | 0.818997 | 0.302696 |
| 0  | 074  | 0.838821 | 0.484820 | 0.459266 |
| 0  | 075  | 0.950581 | 0.414342 | 0.758123 |
| 0  | 076  | 0.066002 | 0.636528 | 0.417807 |
| 0  | 077  | 0.560690 | 0.181212 | 0.641586 |
| 0  | 078  | 0.505283 | 0.832654 | 0.803966 |
| 0  | 079  | 0.619567 | 0.746979 | 0.099484 |
| 0  | 080  | 0.734167 | 0.975361 | 0.754933 |
| 0  | 081  | 0.233891 | 0.502439 | 0.975535 |
| 0  | 082  | 0.173466 | 0.159485 | 0.129512 |
| 0  | 083  | 0.824830 | 0.679779 | 0.606935 |
| Al | Al84 | 0.927979 | 0.606173 | 0.399098 |
| Al | Al85 | 0.595623 | 0.940819 | 0.734180 |
| Al | Al86 | 0.265985 | 0.275815 | 0.069219 |
| Al | Al87 | 0.387619 | 0.843653 | 0.401095 |
| Al | Al88 | 0.054575 | 0.175386 | 0.733800 |
| Al | Al89 | 0.722739 | 0.508955 | 0.066064 |
| Al | Al90 | 0.152423 | 0.059710 | 0.399530 |
| Al | Al91 | 0.821666 | 0.399463 | 0.731301 |
| Al | Al92 | 0.490835 | 0.730734 | 0.070148 |
| Al | Al93 | 0.057855 | 0.404064 | 0.529698 |
| Al | Al94 | 0.715812 | 0.734834 | 0.859888 |
| Al | Al95 | 0.386287 | 0.068912 | 0.194539 |
| Al | Al96 | 0.591672 | 0.169029 | 0.530325 |

|    |       |          |          |          |
|----|-------|----------|----------|----------|
| Al | Al97  | 0.261980 | 0.503256 | 0.862656 |
| Al | Al98  | 0.928518 | 0.833173 | 0.195041 |
| Al | Al99  | 0.828023 | 0.950205 | 0.526841 |
| Al | Al100 | 0.493029 | 0.278412 | 0.861612 |
| Al | Al101 | 0.162156 | 0.612468 | 0.195595 |
| Si | Si102 | 0.924133 | 0.829673 | 0.404947 |
| P  | P103  | 0.057718 | 0.176762 | 0.526120 |
| P  | P104  | 0.718921 | 0.508537 | 0.854660 |
| P  | P105  | 0.388169 | 0.842507 | 0.191456 |
| P  | P106  | 0.823089 | 0.392726 | 0.522643 |
| P  | P107  | 0.487426 | 0.731578 | 0.857620 |
| P  | P108  | 0.155648 | 0.064262 | 0.191454 |
| P  | P109  | 0.593152 | 0.937367 | 0.528031 |
| P  | P110  | 0.266984 | 0.278473 | 0.856870 |
| P  | P111  | 0.933422 | 0.609807 | 0.187931 |
| P  | P112  | 0.594765 | 0.171644 | 0.736797 |
| P  | P113  | 0.264692 | 0.501966 | 0.073365 |
| P  | P114  | 0.161586 | 0.612990 | 0.404307 |
| P  | P115  | 0.826140 | 0.946563 | 0.737794 |
| P  | P116  | 0.495280 | 0.280678 | 0.072265 |
| P  | P117  | 0.386629 | 0.072518 | 0.403984 |
| P  | P118  | 0.052022 | 0.402571 | 0.737675 |
| P  | P119  | 0.719024 | 0.735357 | 0.070604 |

***TS-Methylation-MeOH-Toluene-Si-AIPO-34***

|                                |    |                    |          |          |
|--------------------------------|----|--------------------|----------|----------|
| data_                          |    |                    |          |          |
| _audit_creation_method         |    | 'Materials Studio' |          |          |
| _cell_length_a                 |    | 13.885913          |          |          |
| _cell_length_b                 |    | 13.885913          |          |          |
| _cell_length_c                 |    | 15.094859          |          |          |
| _cell_angle_alpha              |    | 90.000000          |          |          |
| _cell_angle_beta               |    | 90.000000          |          |          |
| _cell_angle_gamma              |    | 120.000000         |          |          |
| _symmetry_space_group_name_H-M |    | 'P1'               |          |          |
| loop_                          |    |                    |          |          |
| _atom_site_type_symbol         |    |                    |          |          |
| _atom_site_label               |    |                    |          |          |
| _atom_site_fract_x             |    |                    |          |          |
| _atom_site_fract_y             |    |                    |          |          |
| _atom_site_fract_z             |    |                    |          |          |
| H                              | H1 | 0.873937           | 0.700710 | 0.555740 |
| H                              | H2 | 0.661284           | 0.662276 | 0.636441 |

|   |     |          |          |          |
|---|-----|----------|----------|----------|
| H | H3  | 0.668203 | 0.532639 | 0.631130 |
| H | H4  | 0.686922 | 0.614852 | 0.528017 |
| H | H5  | 0.862211 | 0.765851 | 0.634454 |
| H | H6  | 0.514094 | 0.363643 | 0.400333 |
| H | H7  | 0.484299 | 0.351284 | 0.562355 |
| H | H8  | 0.479473 | 0.660333 | 0.556747 |
| H | H9  | 0.509436 | 0.671621 | 0.394924 |
| H | H10 | 0.556326 | 0.466266 | 0.264584 |
| H | H11 | 0.612614 | 0.612330 | 0.274352 |
| H | H12 | 0.470062 | 0.525758 | 0.251713 |
| H | H13 | 0.464572 | 0.498480 | 0.641591 |
| C | C14 | 0.665997 | 0.599810 | 0.597260 |
| C | C15 | 0.491375 | 0.421891 | 0.525715 |
| C | C16 | 0.489115 | 0.509668 | 0.572239 |
| C | C17 | 0.488228 | 0.596324 | 0.522548 |
| C | C18 | 0.504230 | 0.602043 | 0.431795 |
| C | C19 | 0.516660 | 0.519846 | 0.386637 |
| C | C20 | 0.540282 | 0.530908 | 0.289029 |
| C | C21 | 0.507417 | 0.428659 | 0.434750 |
| O | O22 | 0.073904 | 0.293569 | 0.499439 |
| O | O23 | 0.296940 | 0.402205 | 0.836058 |
| O | O24 | 0.145301 | 0.481055 | 0.798480 |
| O | O25 | 0.162553 | 0.107183 | 0.284637 |
| O | O26 | 0.090632 | 0.177496 | 0.619713 |
| O | O27 | 0.365354 | 0.267274 | 0.826760 |
| O | O28 | 0.247480 | 0.037111 | 0.172261 |
| O | O29 | 0.476627 | 0.184995 | 0.126152 |
| O | O30 | 0.165963 | 0.201235 | 0.797921 |
| O | O31 | 0.249321 | 0.391003 | 0.095803 |
| O | O32 | 0.020607 | 0.283749 | 0.747469 |
| O | O33 | 0.419144 | 0.107332 | 0.303569 |
| O | O34 | 0.130067 | 0.155041 | 0.462246 |
| O | O35 | 0.093181 | 0.442850 | 0.639020 |
| O | O36 | 0.285130 | 0.084935 | 0.425615 |
| O | O37 | 0.402703 | 0.312604 | 0.087491 |
| O | O38 | 0.172021 | 0.160597 | 0.125903 |
| O | O39 | 0.730845 | 0.623790 | 0.828719 |
| O | O40 | 0.963241 | 0.732394 | 0.164890 |
| O | O41 | 0.821080 | 0.818938 | 0.119811 |
| O | O42 | 0.559574 | 0.897470 | 0.621493 |
| O | O43 | 0.844130 | 0.857121 | 0.465054 |
| O | O44 | 0.897700 | 0.582336 | 0.282614 |
| O | O45 | 0.698009 | 0.939240 | 0.499194 |
| O | O46 | 0.578973 | 0.705431 | 0.830682 |

|   |     |          |          |          |
|---|-----|----------|----------|----------|
| 0 | 047 | 0.808875 | 0.851921 | 0.793025 |
| 0 | 048 | 0.908164 | 0.712566 | 0.438914 |
| 0 | 049 | 0.690894 | 0.617271 | 0.081210 |
| 0 | 050 | 0.497770 | 0.860417 | 0.463928 |
| 0 | 051 | 0.825111 | 0.916772 | 0.638344 |
| 0 | 052 | 0.835894 | 0.531222 | 0.126156 |
| 0 | 053 | 0.880913 | 0.816433 | 0.300102 |
| 0 | 054 | 0.838513 | 0.486561 | 0.455349 |
| 0 | 055 | 0.505486 | 0.835760 | 0.802188 |
| 0 | 056 | 0.618802 | 0.748345 | 0.098314 |
| 0 | 057 | 0.733369 | 0.978046 | 0.752036 |
| 0 | 058 | 0.815979 | 0.431559 | 0.615059 |
| 0 | 059 | 0.483413 | 0.156109 | 0.459369 |
| 0 | 060 | 0.612123 | 0.057747 | 0.517205 |
| 0 | 061 | 0.713284 | 0.290543 | 0.495817 |
| 0 | 062 | 0.597112 | 0.420384 | 0.835187 |
| 0 | 063 | 0.518918 | 0.190547 | 0.797811 |
| 0 | 064 | 0.932220 | 0.092052 | 0.510882 |
| 0 | 065 | 0.917958 | 0.369906 | 0.512257 |
| 0 | 066 | 0.581454 | 0.060094 | 0.750087 |
| 0 | 067 | 0.938001 | 0.051232 | 0.759722 |
| 0 | 068 | 0.796822 | 0.492220 | 0.792449 |
| 0 | 069 | 0.606850 | 0.384390 | 0.093962 |
| 0 | 070 | 0.717332 | 0.263892 | 0.748890 |
| 0 | 071 | 0.951031 | 0.418116 | 0.754232 |
| 0 | 072 | 0.560213 | 0.183404 | 0.638357 |
| 0 | 073 | 0.490204 | 0.758126 | 0.953424 |
| 0 | 074 | 0.749956 | 0.508350 | 0.949298 |
| 0 | 075 | 0.741132 | 0.769083 | 0.968789 |
| 0 | 076 | 0.401755 | 0.957754 | 0.164881 |
| 0 | 077 | 0.374994 | 0.634668 | 0.827646 |
| 0 | 078 | 0.266256 | 0.754008 | 0.173911 |
| 0 | 079 | 0.043022 | 0.965279 | 0.169096 |
| 0 | 080 | 0.185605 | 0.525493 | 0.126575 |
| 0 | 081 | 0.146821 | 0.519409 | 0.460843 |
| 0 | 082 | 0.032647 | 0.597807 | 0.164599 |
| 0 | 083 | 0.421447 | 0.843617 | 0.285695 |
| 0 | 084 | 0.166684 | 0.582300 | 0.304035 |
| 0 | 085 | 0.361169 | 0.954972 | 0.416843 |
| 0 | 086 | 0.271351 | 0.718558 | 0.425971 |
| 0 | 087 | 0.386289 | 0.594142 | 0.088693 |
| 0 | 088 | 0.052031 | 0.926858 | 0.410060 |
| 0 | 089 | 0.465003 | 0.824055 | 0.128600 |
| 0 | 090 | 0.066223 | 0.638310 | 0.413294 |

|    |       |          |          |          |
|----|-------|----------|----------|----------|
| O  | O91   | 0.238294 | 0.251972 | 0.951809 |
| O  | O92   | 0.493444 | 0.254041 | 0.971373 |
| O  | O93   | 0.236643 | 0.506176 | 0.972355 |
| O  | O94   | 0.847851 | 0.692231 | 0.617931 |
| Al | Al95  | 0.264141 | 0.277455 | 0.065823 |
| Al | Al96  | 0.054036 | 0.178353 | 0.730685 |
| Al | Al97  | 0.152103 | 0.062805 | 0.396452 |
| Al | Al98  | 0.057832 | 0.406551 | 0.526900 |
| Al | Al99  | 0.385449 | 0.071423 | 0.191533 |
| Al | Al100 | 0.493321 | 0.282357 | 0.858483 |
| Al | Al101 | 0.928079 | 0.608826 | 0.396479 |
| Al | Al102 | 0.594888 | 0.943525 | 0.731719 |
| Al | Al103 | 0.490472 | 0.732422 | 0.067382 |
| Al | Al104 | 0.715982 | 0.737885 | 0.856778 |
| Al | Al105 | 0.927092 | 0.834820 | 0.193175 |
| Al | Al106 | 0.827392 | 0.951527 | 0.523994 |
| Al | Al107 | 0.722502 | 0.511087 | 0.062974 |
| Al | Al108 | 0.821753 | 0.402470 | 0.727783 |
| Al | Al109 | 0.591600 | 0.171152 | 0.527230 |
| Al | Al110 | 0.387250 | 0.845437 | 0.397725 |
| Al | Al111 | 0.262551 | 0.505903 | 0.858946 |
| Al | Al112 | 0.161821 | 0.614995 | 0.192284 |
| Si | Si113 | 0.922263 | 0.830547 | 0.402053 |
| P  | P114  | 0.056247 | 0.178374 | 0.522554 |
| P  | P115  | 0.155564 | 0.066789 | 0.188988 |
| P  | P116  | 0.266331 | 0.280726 | 0.853707 |
| P  | P117  | 0.264612 | 0.504405 | 0.070591 |
| P  | P118  | 0.385837 | 0.074793 | 0.400886 |
| P  | P119  | 0.052483 | 0.406078 | 0.734374 |
| P  | P120  | 0.718932 | 0.511040 | 0.852200 |
| P  | P121  | 0.592328 | 0.939262 | 0.525438 |
| P  | P122  | 0.932604 | 0.612226 | 0.185433 |
| P  | P123  | 0.826227 | 0.950367 | 0.735440 |
| P  | P124  | 0.718854 | 0.738538 | 0.067457 |
| P  | P125  | 0.822499 | 0.395278 | 0.519630 |
| P  | P126  | 0.594988 | 0.174698 | 0.733632 |
| P  | P127  | 0.494591 | 0.283872 | 0.069574 |
| P  | P128  | 0.388142 | 0.844601 | 0.188512 |
| P  | P129  | 0.487563 | 0.733526 | 0.854220 |
| P  | P130  | 0.161807 | 0.614705 | 0.400674 |

***TS-Methylation-MeOH-TMB-Si-ALPO-34***



```

data_
_audit_creation_method      'Materials Studio'
_cell_length_a              13.885913
_cell_length_b              13.885913
_cell_length_c              15.094859
_cell_angle_alpha           90.000000
_cell_angle_beta            90.000000
_cell_angle_gamma           120.000000
_symmetry_space_group_name_H-M  'P1'
loop_
_atom_site_type_symbol
_atom_site_label
_atom_site_fract_x
_atom_site_fract_y
_atom_site_fract_z
  H      H1              0.863815          0.699344          0.555178
  H      H2              0.634813          0.609500          0.641273
  H      H3              0.676494          0.514774          0.590134
  H      H4              0.675221          0.626280          0.521482
  H      H5              0.838677          0.759163          0.630942
  H      H6              0.521474          0.406431          0.260942
  H      H7              0.585020          0.360652          0.339226
  H      H8              0.659535          0.496323          0.294492
  H      H9              0.453835          0.441638          0.691145
  H      H10             0.474000          0.339682          0.637016
  H      H11             0.346875          0.338004          0.625829
  H      H12             0.398131          0.660097          0.582758
  H      H13             0.462573          0.618972          0.663930
  H      H14             0.328060          0.523801          0.626961
  H      H15             0.637380          0.668919          0.280656
  H      H16             0.523455          0.691234          0.292719
  H      H17             0.506871          0.570733          0.237337
  H      H18             0.525774          0.354394          0.485341
  H      H19             0.465545          0.671252          0.438630
  C      C20             0.658107          0.581032          0.582868
  C      C21             0.577732          0.431835          0.317877
  C      C22             0.514179          0.425176          0.474831
  C      C23             0.479573          0.464544          0.548449
  C      C24             0.437238          0.392935          0.630545
  C      C25             0.456433          0.552793          0.533199
  C      C26             0.409110          0.591549          0.605152
  C      C27             0.479310          0.602037          0.449762
  C      C28             0.520033          0.566572          0.379452
  C      C29             0.547583          0.627491          0.292873

```

|   |     |          |          |          |
|---|-----|----------|----------|----------|
| C | C30 | 0.536504 | 0.474611 | 0.391825 |
| O | 031 | 0.073762 | 0.294636 | 0.502938 |
| O | 032 | 0.294513 | 0.402611 | 0.839261 |
| O | 033 | 0.143289 | 0.481354 | 0.800493 |
| O | 034 | 0.161276 | 0.108507 | 0.287126 |
| O | 035 | 0.089781 | 0.178107 | 0.623008 |
| O | 036 | 0.362177 | 0.266755 | 0.832280 |
| O | 037 | 0.247004 | 0.038958 | 0.174828 |
| O | 038 | 0.477751 | 0.187582 | 0.131234 |
| O | 039 | 0.163389 | 0.201711 | 0.801331 |
| O | 040 | 0.253961 | 0.394869 | 0.100413 |
| O | 041 | 0.018175 | 0.283947 | 0.749660 |
| O | 042 | 0.417422 | 0.105594 | 0.306453 |
| O | 043 | 0.124399 | 0.152350 | 0.465080 |
| O | 044 | 0.089588 | 0.443305 | 0.641471 |
| O | 045 | 0.286871 | 0.092193 | 0.428611 |
| O | 046 | 0.404132 | 0.313743 | 0.087163 |
| O | 047 | 0.172770 | 0.163457 | 0.129018 |
| O | 048 | 0.723526 | 0.621556 | 0.826619 |
| O | 049 | 0.963903 | 0.734377 | 0.166979 |
| O | 050 | 0.819738 | 0.818867 | 0.122303 |
| O | 051 | 0.558869 | 0.902589 | 0.622294 |
| O | 052 | 0.849721 | 0.862818 | 0.467231 |
| O | 053 | 0.899382 | 0.584657 | 0.284949 |
| O | 054 | 0.694715 | 0.933525 | 0.499973 |
| O | 055 | 0.575312 | 0.706140 | 0.837000 |
| O | 056 | 0.805450 | 0.851754 | 0.795605 |
| O | 057 | 0.907597 | 0.714133 | 0.440774 |
| O | 058 | 0.688080 | 0.616912 | 0.085577 |
| O | 059 | 0.496668 | 0.867435 | 0.465122 |
| O | 060 | 0.821978 | 0.915661 | 0.640709 |
| O | 061 | 0.835121 | 0.533161 | 0.128970 |
| O | 062 | 0.882276 | 0.819258 | 0.302052 |
| O | 063 | 0.840021 | 0.489240 | 0.457942 |
| O | 064 | 0.500964 | 0.833768 | 0.800439 |
| O | 065 | 0.618956 | 0.751272 | 0.095967 |
| O | 066 | 0.730756 | 0.978123 | 0.754041 |
| O | 067 | 0.815502 | 0.431617 | 0.617024 |
| O | 068 | 0.483086 | 0.152315 | 0.461748 |
| O | 069 | 0.622272 | 0.063562 | 0.516979 |
| O | 070 | 0.711062 | 0.294033 | 0.496400 |
| O | 071 | 0.594761 | 0.418529 | 0.843587 |
| O | 072 | 0.515058 | 0.191220 | 0.796787 |
| O | 073 | 0.928492 | 0.094477 | 0.516517 |

|    |       |          |          |          |
|----|-------|----------|----------|----------|
| O  | 074   | 0.915314 | 0.368281 | 0.513384 |
| O  | 075   | 0.579320 | 0.060267 | 0.755020 |
| O  | 076   | 0.935203 | 0.050865 | 0.761724 |
| O  | 077   | 0.792539 | 0.491686 | 0.793480 |
| O  | 078   | 0.608245 | 0.383692 | 0.089813 |
| O  | 079   | 0.714810 | 0.264039 | 0.751394 |
| O  | 080   | 0.948318 | 0.418120 | 0.757665 |
| O  | 081   | 0.559977 | 0.180599 | 0.639236 |
| O  | 082   | 0.489833 | 0.768584 | 0.955484 |
| O  | 083   | 0.754540 | 0.517756 | 0.950492 |
| O  | 084   | 0.743951 | 0.766507 | 0.970156 |
| O  | 085   | 0.400398 | 0.958928 | 0.165347 |
| O  | 086   | 0.371329 | 0.635453 | 0.835458 |
| O  | 087   | 0.265873 | 0.754991 | 0.174854 |
| O  | 088   | 0.042673 | 0.967619 | 0.170370 |
| O  | 089   | 0.186662 | 0.526327 | 0.131421 |
| O  | 090   | 0.144538 | 0.519287 | 0.463202 |
| O  | 091   | 0.032419 | 0.598895 | 0.165852 |
| O  | 092   | 0.417928 | 0.846618 | 0.288772 |
| O  | 093   | 0.165935 | 0.584933 | 0.306938 |
| O  | 094   | 0.351543 | 0.952908 | 0.420076 |
| O  | 095   | 0.271888 | 0.718186 | 0.430212 |
| O  | 096   | 0.385728 | 0.598145 | 0.085556 |
| O  | 097   | 0.055818 | 0.926712 | 0.410449 |
| O  | 098   | 0.466233 | 0.826049 | 0.133753 |
| O  | 099   | 0.067225 | 0.641592 | 0.417129 |
| O  | 0100  | 0.233937 | 0.253011 | 0.955647 |
| O  | 0101  | 0.488908 | 0.245246 | 0.973614 |
| O  | 0102  | 0.228890 | 0.501235 | 0.976046 |
| O  | 0103  | 0.831494 | 0.687884 | 0.615504 |
| Al | Al104 | 0.265207 | 0.279817 | 0.068846 |
| Al | Al105 | 0.051489 | 0.178231 | 0.733801 |
| Al | Al106 | 0.151980 | 0.064399 | 0.398797 |
| Al | Al107 | 0.055452 | 0.406496 | 0.529247 |
| Al | Al108 | 0.384646 | 0.072376 | 0.194143 |
| Al | Al109 | 0.489979 | 0.279944 | 0.861983 |
| Al | Al110 | 0.929193 | 0.611376 | 0.398909 |
| Al | Al111 | 0.592627 | 0.944243 | 0.733271 |
| Al | Al112 | 0.490489 | 0.736899 | 0.068131 |
| Al | Al113 | 0.712794 | 0.736950 | 0.858522 |
| Al | Al114 | 0.927332 | 0.836758 | 0.194777 |
| Al | Al115 | 0.826254 | 0.952252 | 0.526627 |
| Al | Al116 | 0.722873 | 0.513361 | 0.064053 |
| Al | Al117 | 0.819205 | 0.402450 | 0.730084 |

|    |       |          |          |          |
|----|-------|----------|----------|----------|
| Al | Al118 | 0.593260 | 0.171197 | 0.528356 |
| Al | Al119 | 0.383527 | 0.847541 | 0.400646 |
| Al | Al120 | 0.258857 | 0.505264 | 0.863113 |
| Al | Al121 | 0.161517 | 0.616421 | 0.194818 |
| Si | Si122 | 0.924944 | 0.833174 | 0.403660 |
| P  | P123  | 0.053528 | 0.178537 | 0.526285 |
| P  | P124  | 0.155153 | 0.068771 | 0.191400 |
| P  | P125  | 0.263318 | 0.281063 | 0.857700 |
| P  | P126  | 0.264069 | 0.505529 | 0.073168 |
| P  | P127  | 0.383341 | 0.074913 | 0.403786 |
| P  | P128  | 0.049708 | 0.406243 | 0.737015 |
| P  | P129  | 0.716501 | 0.512027 | 0.854213 |
| P  | P130  | 0.593496 | 0.942023 | 0.526165 |
| P  | P131  | 0.932959 | 0.614085 | 0.187423 |
| P  | P132  | 0.823291 | 0.949916 | 0.737685 |
| P  | P133  | 0.718396 | 0.738539 | 0.068896 |
| P  | P134  | 0.821768 | 0.396374 | 0.521205 |
| P  | P135  | 0.592853 | 0.174246 | 0.735533 |
| P  | P136  | 0.494579 | 0.282580 | 0.070309 |
| P  | P137  | 0.387075 | 0.846403 | 0.190837 |
| P  | P138  | 0.484528 | 0.735972 | 0.857839 |
| P  | P139  | 0.161369 | 0.615981 | 0.403944 |

***TS-Methylation-ZCH3-C2-Si-AIPO-34***

|                                |    |                    |          |          |
|--------------------------------|----|--------------------|----------|----------|
| data_                          |    |                    |          |          |
| _audit_creation_method         |    | 'Materials Studio' |          |          |
| _cell_length_a                 |    | 13.885913          |          |          |
| _cell_length_b                 |    | 13.885913          |          |          |
| _cell_length_c                 |    | 15.094859          |          |          |
| _cell_angle_alpha              |    | 90.000000          |          |          |
| _cell_angle_beta               |    | 90.000000          |          |          |
| _cell_angle_gamma              |    | 120.000000         |          |          |
| _symmetry_space_group_name_H-M |    | 'P1'               |          |          |
| loop_                          |    |                    |          |          |
| _atom_site_type_symbol         |    |                    |          |          |
| _atom_site_label               |    |                    |          |          |
| _atom_site_fract_x             |    |                    |          |          |
| _atom_site_fract_y             |    |                    |          |          |
| _atom_site_fract_z             |    |                    |          |          |
| H                              | H1 | 0.702019           | 0.554771 | 0.455765 |
| H                              | H2 | 0.775957           | 0.603453 | 0.562426 |
| H                              | H3 | 0.733263           | 0.693332 | 0.501688 |

|   |     |          |          |          |
|---|-----|----------|----------|----------|
| H | H4  | 0.610492 | 0.474621 | 0.642833 |
| H | H5  | 0.625221 | 0.613666 | 0.656501 |
| H | H6  | 0.510100 | 0.449598 | 0.501123 |
| H | H7  | 0.524798 | 0.588994 | 0.514115 |
| C | C8  | 0.732016 | 0.615433 | 0.508368 |
| C | C9  | 0.597970 | 0.540011 | 0.615976 |
| C | C10 | 0.542948 | 0.526303 | 0.538706 |
| O | O11 | 0.081894 | 0.293310 | 0.500770 |
| O | O12 | 0.298272 | 0.399019 | 0.843288 |
| O | O13 | 0.822988 | 0.434126 | 0.616962 |
| O | O14 | 0.486501 | 0.155113 | 0.461398 |
| O | O15 | 0.732400 | 0.620964 | 0.828362 |
| O | O16 | 0.966533 | 0.730399 | 0.166480 |
| O | O17 | 0.494720 | 0.761210 | 0.955611 |
| O | O18 | 0.148345 | 0.478641 | 0.800885 |
| O | O19 | 0.404547 | 0.955418 | 0.165688 |
| O | O20 | 0.617033 | 0.057878 | 0.516706 |
| O | O21 | 0.157673 | 0.094788 | 0.288968 |
| O | O22 | 0.823227 | 0.815982 | 0.122481 |
| O | O23 | 0.714912 | 0.291468 | 0.500047 |
| O | O24 | 0.600634 | 0.417468 | 0.839728 |
| O | O25 | 0.566377 | 0.900344 | 0.623516 |
| O | O26 | 0.848795 | 0.860437 | 0.465112 |
| O | O27 | 0.377326 | 0.632033 | 0.833312 |
| O | O28 | 0.269798 | 0.751817 | 0.176590 |
| O | O29 | 0.239563 | 0.245440 | 0.956058 |
| O | O30 | 0.522088 | 0.189146 | 0.799619 |
| O | O31 | 0.047162 | 0.963143 | 0.165190 |
| O | O32 | 0.935284 | 0.093571 | 0.515720 |
| O | O33 | 0.904416 | 0.581135 | 0.284273 |
| O | O34 | 0.190350 | 0.522658 | 0.132734 |
| O | O35 | 0.702108 | 0.938807 | 0.499538 |
| O | O36 | 0.581446 | 0.703199 | 0.834853 |
| O | O37 | 0.095915 | 0.177417 | 0.622594 |
| O | O38 | 0.142189 | 0.518631 | 0.464307 |
| O | O39 | 0.368301 | 0.265705 | 0.830812 |
| O | O40 | 0.251280 | 0.035757 | 0.175272 |
| O | O41 | 0.756384 | 0.510410 | 0.950938 |
| O | O42 | 0.811635 | 0.849618 | 0.795249 |
| O | O43 | 0.036693 | 0.596413 | 0.164033 |
| O | O44 | 0.917862 | 0.359699 | 0.518184 |
| O | O45 | 0.424057 | 0.843791 | 0.288648 |
| O | O46 | 0.480858 | 0.183217 | 0.129714 |
| O | O47 | 0.896033 | 0.702827 | 0.438214 |

|    |      |          |          |          |
|----|------|----------|----------|----------|
| 0  | 048  | 0.693209 | 0.614121 | 0.084503 |
| 0  | 049  | 0.164457 | 0.581641 | 0.307785 |
| 0  | 050  | 0.501494 | 0.859015 | 0.466972 |
| 0  | 051  | 0.585008 | 0.058317 | 0.754481 |
| 0  | 052  | 0.364471 | 0.952691 | 0.421908 |
| 0  | 053  | 0.824343 | 0.915469 | 0.640481 |
| 0  | 054  | 0.168882 | 0.198937 | 0.801455 |
| 0  | 055  | 0.254164 | 0.389775 | 0.097003 |
| 0  | 056  | 0.023401 | 0.280888 | 0.750598 |
| 0  | 057  | 0.495397 | 0.247910 | 0.973843 |
| 0  | 058  | 0.839062 | 0.528956 | 0.128537 |
| 0  | 059  | 0.275880 | 0.715861 | 0.429179 |
| 0  | 060  | 0.389236 | 0.593129 | 0.087574 |
| 0  | 061  | 0.421667 | 0.102218 | 0.306322 |
| 0  | 062  | 0.129867 | 0.147749 | 0.465159 |
| 0  | 063  | 0.941397 | 0.048356 | 0.761125 |
| 0  | 064  | 0.056748 | 0.917065 | 0.418855 |
| 0  | 065  | 0.095974 | 0.439467 | 0.641686 |
| 0  | 066  | 0.799464 | 0.490507 | 0.793361 |
| 0  | 067  | 0.611607 | 0.381140 | 0.093569 |
| 0  | 068  | 0.720087 | 0.262212 | 0.749189 |
| 0  | 069  | 0.745952 | 0.764779 | 0.970822 |
| 0  | 070  | 0.468940 | 0.821928 | 0.132494 |
| 0  | 071  | 0.288024 | 0.082177 | 0.428043 |
| 0  | 072  | 0.407404 | 0.310655 | 0.089008 |
| 0  | 073  | 0.891676 | 0.821721 | 0.301624 |
| 0  | 074  | 0.849323 | 0.483370 | 0.456058 |
| 0  | 075  | 0.953994 | 0.415438 | 0.756738 |
| 0  | 076  | 0.073086 | 0.647947 | 0.417332 |
| 0  | 077  | 0.561555 | 0.178243 | 0.640594 |
| 0  | 078  | 0.507063 | 0.831868 | 0.802156 |
| 0  | 079  | 0.621892 | 0.746280 | 0.098613 |
| 0  | 080  | 0.736764 | 0.976652 | 0.757350 |
| 0  | 081  | 0.234031 | 0.503480 | 0.976104 |
| 0  | 082  | 0.177638 | 0.162071 | 0.133344 |
| Al | Al83 | 0.932927 | 0.607884 | 0.397920 |
| Al | Al84 | 0.598879 | 0.942098 | 0.734618 |
| Al | Al85 | 0.268505 | 0.275532 | 0.069404 |
| Al | Al86 | 0.391090 | 0.843727 | 0.401056 |
| Al | Al87 | 0.057425 | 0.175772 | 0.733611 |
| Al | Al88 | 0.726079 | 0.509242 | 0.064809 |
| Al | Al89 | 0.153058 | 0.054762 | 0.401184 |
| Al | Al90 | 0.825242 | 0.400358 | 0.729849 |
| Al | Al91 | 0.493858 | 0.731598 | 0.068998 |

|    |       |          |          |          |
|----|-------|----------|----------|----------|
| Al | Al92  | 0.060234 | 0.402711 | 0.529851 |
| Al | Al93  | 0.718938 | 0.735705 | 0.858694 |
| Al | Al94  | 0.388981 | 0.069033 | 0.194040 |
| Al | Al95  | 0.593978 | 0.169305 | 0.529324 |
| Al | Al96  | 0.264187 | 0.503370 | 0.863451 |
| Al | Al97  | 0.931745 | 0.834104 | 0.193271 |
| Al | Al98  | 0.831183 | 0.952620 | 0.527266 |
| Al | Al99  | 0.495786 | 0.279330 | 0.861692 |
| Al | Al100 | 0.164955 | 0.613324 | 0.195028 |
| Si | Si101 | 0.925524 | 0.829557 | 0.404718 |
| P  | P102  | 0.060417 | 0.176858 | 0.525630 |
| P  | P103  | 0.722285 | 0.509541 | 0.854240 |
| P  | P104  | 0.391511 | 0.842988 | 0.191122 |
| P  | P105  | 0.827383 | 0.392231 | 0.522748 |
| P  | P106  | 0.490279 | 0.732093 | 0.857154 |
| P  | P107  | 0.157955 | 0.063351 | 0.191645 |
| P  | P108  | 0.597010 | 0.939335 | 0.526881 |
| P  | P109  | 0.268422 | 0.277399 | 0.858434 |
| P  | P110  | 0.936894 | 0.610491 | 0.186420 |
| P  | P111  | 0.597516 | 0.171964 | 0.735876 |
| P  | P112  | 0.267264 | 0.502533 | 0.073126 |
| P  | P113  | 0.163403 | 0.616094 | 0.404296 |
| P  | P114  | 0.828592 | 0.947999 | 0.737934 |
| P  | P115  | 0.498430 | 0.280692 | 0.071545 |
| P  | P116  | 0.388918 | 0.072074 | 0.403868 |
| P  | P117  | 0.055499 | 0.403141 | 0.737180 |
| P  | P118  | 0.721648 | 0.735339 | 0.069534 |

***TS-Methylation-ZCH3-C3-Si-ALPO-34***

```

data_
_audit_creation_method    'Materials Studio'
_cell_length_a            13.885913
_cell_length_b            13.885913
_cell_length_c            15.094859
_cell_angle_alpha        90.000000
_cell_angle_beta         90.000000
_cell_angle_gamma        120.000000
_symmetry_space_group_name_H-M  'P1'
loop_
_atom_site_type_symbol
_atom_site_label
_atom_site_fract_x

```

\_atom\_site\_fract\_y

\_atom\_site\_fract\_z

|   |     |          |          |          |
|---|-----|----------|----------|----------|
| H | H1  | 0.705957 | 0.557814 | 0.459982 |
| H | H2  | 0.785073 | 0.608081 | 0.564889 |
| H | H3  | 0.737689 | 0.695739 | 0.506245 |
| H | H4  | 0.616275 | 0.477240 | 0.634508 |
| H | H5  | 0.624127 | 0.612592 | 0.653561 |
| H | H6  | 0.503538 | 0.445605 | 0.502595 |
| H | H7  | 0.400803 | 0.552805 | 0.507653 |
| H | H8  | 0.518180 | 0.624663 | 0.440099 |
| H | H9  | 0.520842 | 0.671413 | 0.550620 |
| C | C10 | 0.740736 | 0.619964 | 0.511256 |
| C | C11 | 0.599022 | 0.540869 | 0.611009 |
| C | C12 | 0.531840 | 0.522400 | 0.539919 |
| C | C13 | 0.492101 | 0.598105 | 0.508651 |
| O | O14 | 0.083646 | 0.294244 | 0.501213 |
| O | O15 | 0.298224 | 0.398903 | 0.842898 |
| O | O16 | 0.824475 | 0.434379 | 0.616883 |
| O | O17 | 0.486897 | 0.155350 | 0.461129 |
| O | O18 | 0.732570 | 0.620842 | 0.828422 |
| O | O19 | 0.966980 | 0.730309 | 0.165566 |
| O | O20 | 0.494073 | 0.761663 | 0.955558 |
| O | O21 | 0.148232 | 0.478331 | 0.801021 |
| O | O22 | 0.404430 | 0.955280 | 0.165227 |
| O | O23 | 0.617958 | 0.058851 | 0.516801 |
| O | O24 | 0.157599 | 0.095184 | 0.288709 |
| O | O25 | 0.823148 | 0.815735 | 0.122403 |
| O | O26 | 0.715344 | 0.291906 | 0.500138 |
| O | O27 | 0.600845 | 0.417386 | 0.840863 |
| O | O28 | 0.566047 | 0.900326 | 0.623028 |
| O | O29 | 0.851103 | 0.863473 | 0.464064 |
| O | O30 | 0.377045 | 0.631984 | 0.833422 |
| O | O31 | 0.269792 | 0.751600 | 0.176141 |
| O | O32 | 0.240184 | 0.245976 | 0.956071 |
| O | O33 | 0.522188 | 0.189090 | 0.799638 |
| O | O34 | 0.047199 | 0.963086 | 0.165181 |
| O | O35 | 0.935115 | 0.095226 | 0.516426 |
| O | O36 | 0.904887 | 0.582689 | 0.284686 |
| O | O37 | 0.190366 | 0.522388 | 0.132907 |
| O | O38 | 0.702154 | 0.938948 | 0.499328 |
| O | O39 | 0.581184 | 0.703091 | 0.835491 |
| O | O40 | 0.096456 | 0.177193 | 0.622667 |
| O | O41 | 0.143472 | 0.518969 | 0.464603 |
| O | O42 | 0.368303 | 0.265594 | 0.830518 |



|    |      |          |          |          |
|----|------|----------|----------|----------|
| 0  | 043  | 0.251346 | 0.035704 | 0.175459 |
| 0  | 044  | 0.757770 | 0.511008 | 0.950897 |
| 0  | 045  | 0.811228 | 0.849370 | 0.794840 |
| 0  | 046  | 0.036467 | 0.595703 | 0.164719 |
| 0  | 047  | 0.918336 | 0.359621 | 0.517339 |
| 0  | 048  | 0.423399 | 0.843930 | 0.288645 |
| 0  | 049  | 0.481187 | 0.183296 | 0.129816 |
| 0  | 050  | 0.896225 | 0.703421 | 0.439399 |
| 0  | 051  | 0.693304 | 0.613892 | 0.084354 |
| 0  | 052  | 0.165412 | 0.582218 | 0.308083 |
| 0  | 053  | 0.501908 | 0.860332 | 0.466340 |
| 0  | 054  | 0.584856 | 0.058148 | 0.754245 |
| 0  | 055  | 0.363645 | 0.952943 | 0.422110 |
| 0  | 056  | 0.824633 | 0.915536 | 0.640005 |
| 0  | 057  | 0.168676 | 0.198581 | 0.801778 |
| 0  | 058  | 0.254598 | 0.389805 | 0.097444 |
| 0  | 059  | 0.023522 | 0.280693 | 0.750280 |
| 0  | 060  | 0.494147 | 0.246765 | 0.973744 |
| 0  | 061  | 0.838775 | 0.528508 | 0.129268 |
| 0  | 062  | 0.276459 | 0.716199 | 0.429705 |
| 0  | 063  | 0.389287 | 0.593248 | 0.087626 |
| 0  | 064  | 0.422039 | 0.102087 | 0.306118 |
| 0  | 065  | 0.128724 | 0.146793 | 0.464988 |
| 0  | 066  | 0.941251 | 0.048161 | 0.760889 |
| 0  | 067  | 0.058017 | 0.916683 | 0.417842 |
| 0  | 068  | 0.095702 | 0.439743 | 0.641815 |
| 0  | 069  | 0.799286 | 0.490213 | 0.793146 |
| 0  | 070  | 0.611890 | 0.380833 | 0.092562 |
| 0  | 071  | 0.720037 | 0.261995 | 0.748835 |
| 0  | 072  | 0.746367 | 0.764624 | 0.970558 |
| 0  | 073  | 0.469254 | 0.821873 | 0.132889 |
| 0  | 074  | 0.288732 | 0.083775 | 0.427584 |
| 0  | 075  | 0.407728 | 0.310725 | 0.089338 |
| 0  | 076  | 0.892042 | 0.820451 | 0.301331 |
| 0  | 077  | 0.849923 | 0.483622 | 0.455970 |
| 0  | 078  | 0.953754 | 0.414885 | 0.757218 |
| 0  | 079  | 0.073402 | 0.647758 | 0.417723 |
| 0  | 080  | 0.561248 | 0.178089 | 0.640512 |
| 0  | 081  | 0.506944 | 0.831578 | 0.801690 |
| 0  | 082  | 0.621888 | 0.746052 | 0.098070 |
| 0  | 083  | 0.736656 | 0.976541 | 0.756656 |
| 0  | 084  | 0.234027 | 0.502914 | 0.976264 |
| 0  | 085  | 0.177725 | 0.161842 | 0.132894 |
| Al | Al86 | 0.933294 | 0.608344 | 0.398345 |

|    |       |          |          |          |
|----|-------|----------|----------|----------|
| Al | Al87  | 0.598728 | 0.941975 | 0.734266 |
| Al | Al88  | 0.268928 | 0.275657 | 0.069419 |
| Al | Al89  | 0.390885 | 0.844500 | 0.401027 |
| Al | Al90  | 0.057526 | 0.175509 | 0.733624 |
| Al | Al91  | 0.726493 | 0.509180 | 0.064600 |
| Al | Al92  | 0.153318 | 0.054950 | 0.400816 |
| Al | Al93  | 0.825243 | 0.400183 | 0.729812 |
| Al | Al94  | 0.493878 | 0.731710 | 0.068815 |
| Al | Al95  | 0.060565 | 0.402881 | 0.529931 |
| Al | Al96  | 0.718786 | 0.735361 | 0.858392 |
| Al | Al97  | 0.389125 | 0.068999 | 0.193866 |
| Al | Al98  | 0.594267 | 0.169958 | 0.529324 |
| Al | Al99  | 0.264152 | 0.503132 | 0.863525 |
| Al | Al100 | 0.931950 | 0.833750 | 0.192799 |
| Al | Al101 | 0.831690 | 0.953802 | 0.527077 |
| Al | Al102 | 0.495729 | 0.279224 | 0.861633 |
| Al | Al103 | 0.165116 | 0.613177 | 0.195165 |
| Si | Si104 | 0.926398 | 0.830341 | 0.404377 |
| P  | P105  | 0.060652 | 0.177172 | 0.525893 |
| P  | P106  | 0.722578 | 0.509534 | 0.854352 |
| P  | P107  | 0.391390 | 0.842941 | 0.190937 |
| P  | P108  | 0.828021 | 0.392425 | 0.522594 |
| P  | P109  | 0.490025 | 0.732085 | 0.857198 |
| P  | P110  | 0.158020 | 0.063379 | 0.191491 |
| P  | P111  | 0.597335 | 0.940130 | 0.526569 |
| P  | P112  | 0.268582 | 0.277397 | 0.858314 |
| P  | P113  | 0.936987 | 0.610530 | 0.186593 |
| P  | P114  | 0.597401 | 0.171858 | 0.735730 |
| P  | P115  | 0.267393 | 0.502367 | 0.073303 |
| P  | P116  | 0.164054 | 0.616358 | 0.404632 |
| P  | P117  | 0.828493 | 0.947808 | 0.737512 |
| P  | P118  | 0.498419 | 0.280415 | 0.071323 |
| P  | P119  | 0.389124 | 0.072645 | 0.403695 |
| P  | P120  | 0.055349 | 0.402926 | 0.737321 |
| P  | P121  | 0.721739 | 0.735091 | 0.069207 |

***TS-Methylation-ZCH3-MeOH-Si-AlPO-34***

```

data_
_audit_creation_method      'Materials Studio'
_cell_length_a              13.885913
_cell_length_b              13.885913
_cell_length_c              15.094859

```

```

_cell_angle_alpha      90.000000
_cell_angle_beta      90.000000
_cell_angle_gamma     120.000000
_symmetry_space_group_name_H-M  'P1'
loop_
_atom_site_type_symbol
_atom_site_label
_atom_site_fract_x
_atom_site_fract_y
_atom_site_fract_z
  H      H1          0.689577      0.600959      0.690502
  H      H2          0.719715      0.608505      0.490668
  H      H3          0.816179      0.598401      0.570525
  H      H4          0.808683      0.728816      0.563455
  H      H5          0.511098      0.572262      0.670181
  H      H6          0.536309      0.578271      0.553690
  H      H7          0.610514      0.701067      0.619437
  C      C8          0.573731      0.610695      0.618200
  C      C9          0.780979      0.645039      0.542386
  O      O10         0.086225      0.296532      0.502851
  O      O11         0.299583      0.399823      0.842897
  O      O12         0.829666      0.436488      0.617813
  O      O13         0.489595      0.155866      0.460645
  O      O14         0.728169      0.619573      0.821688
  O      O15         0.967832      0.732051      0.164196
  O      O16         0.489197      0.763077      0.956076
  O      O17         0.148755      0.478290      0.801901
  O      O18         0.404958      0.956810      0.164583
  O      O19         0.621396      0.060622      0.516891
  O      O20         0.160786      0.098274      0.289304
  O      O21         0.823643      0.818078      0.124748
  O      O22         0.716996      0.293276      0.502344
  O      O23         0.600921      0.416827      0.844100
  O      O24         0.568879      0.902396      0.623452
  O      O25         0.857572      0.868687      0.464865
  O      O26         0.378846      0.632079      0.832146
  O      O27         0.270941      0.753135      0.177236
  O      O28         0.240158      0.247360      0.956697
  O      O29         0.522196      0.189104      0.799654
  O      O30         0.047945      0.965345      0.166952
  O      O31         0.935123      0.098634      0.517298
  O      O32         0.904155      0.586129      0.284927
  O      O33         0.191435      0.524741      0.132320
  O      O34         0.702588      0.938243      0.498562

```

|   |     |          |          |          |
|---|-----|----------|----------|----------|
| 0 | 035 | 0.582851 | 0.705533 | 0.841120 |
| 0 | 036 | 0.096370 | 0.176832 | 0.623362 |
| 0 | 037 | 0.144021 | 0.520937 | 0.465630 |
| 0 | 038 | 0.368289 | 0.265496 | 0.831495 |
| 0 | 039 | 0.252223 | 0.037439 | 0.174895 |
| 0 | 040 | 0.759829 | 0.521622 | 0.950722 |
| 0 | 041 | 0.811455 | 0.848081 | 0.793390 |
| 0 | 042 | 0.037101 | 0.597217 | 0.166655 |
| 0 | 043 | 0.919812 | 0.360260 | 0.516046 |
| 0 | 044 | 0.424718 | 0.847552 | 0.289416 |
| 0 | 045 | 0.482694 | 0.186093 | 0.131592 |
| 0 | 046 | 0.901587 | 0.707064 | 0.444016 |
| 0 | 047 | 0.693272 | 0.615547 | 0.088692 |
| 0 | 048 | 0.166740 | 0.582199 | 0.308419 |
| 0 | 049 | 0.502127 | 0.861972 | 0.467437 |
| 0 | 050 | 0.586669 | 0.059016 | 0.756464 |
| 0 | 051 | 0.363052 | 0.953684 | 0.423433 |
| 0 | 052 | 0.825815 | 0.917196 | 0.639682 |
| 0 | 053 | 0.168982 | 0.199399 | 0.802458 |
| 0 | 054 | 0.255819 | 0.391843 | 0.097864 |
| 0 | 055 | 0.023508 | 0.280860 | 0.750645 |
| 0 | 056 | 0.492936 | 0.244104 | 0.974233 |
| 0 | 057 | 0.839939 | 0.530074 | 0.129007 |
| 0 | 058 | 0.276575 | 0.717776 | 0.429515 |
| 0 | 059 | 0.391062 | 0.595177 | 0.088851 |
| 0 | 060 | 0.421739 | 0.101740 | 0.306560 |
| 0 | 061 | 0.127778 | 0.146962 | 0.465386 |
| 0 | 062 | 0.942294 | 0.047805 | 0.761919 |
| 0 | 063 | 0.062666 | 0.918865 | 0.417079 |
| 0 | 064 | 0.094086 | 0.440770 | 0.643062 |
| 0 | 065 | 0.799120 | 0.490581 | 0.794319 |
| 0 | 066 | 0.613387 | 0.382113 | 0.089538 |
| 0 | 067 | 0.719990 | 0.262959 | 0.748774 |
| 0 | 068 | 0.753897 | 0.762678 | 0.971208 |
| 0 | 069 | 0.470695 | 0.823698 | 0.134295 |
| 0 | 070 | 0.291478 | 0.087330 | 0.429197 |
| 0 | 071 | 0.409177 | 0.312765 | 0.088419 |
| 0 | 072 | 0.894716 | 0.818926 | 0.302923 |
| 0 | 073 | 0.851007 | 0.485005 | 0.456863 |
| 0 | 074 | 0.953645 | 0.414817 | 0.760446 |
| 0 | 075 | 0.073604 | 0.648359 | 0.416232 |
| 0 | 076 | 0.560738 | 0.175387 | 0.640902 |
| 0 | 077 | 0.508077 | 0.831915 | 0.801225 |
| 0 | 078 | 0.624416 | 0.750534 | 0.092954 |

|    |       |          |          |          |
|----|-------|----------|----------|----------|
| O  | O79   | 0.737763 | 0.976554 | 0.757824 |
| O  | O80   | 0.237103 | 0.505645 | 0.976363 |
| O  | O81   | 0.178662 | 0.163808 | 0.133377 |
| O  | O82   | 0.658205 | 0.579097 | 0.630985 |
| Al | Al83  | 0.933362 | 0.609533 | 0.398738 |
| Al | Al84  | 0.600187 | 0.943177 | 0.734685 |
| Al | Al85  | 0.269985 | 0.277565 | 0.069945 |
| Al | Al86  | 0.391284 | 0.845988 | 0.401863 |
| Al | Al87  | 0.057911 | 0.175937 | 0.734167 |
| Al | Al88  | 0.727366 | 0.512147 | 0.065376 |
| Al | Al89  | 0.156260 | 0.057821 | 0.401417 |
| Al | Al90  | 0.825933 | 0.400670 | 0.730633 |
| Al | Al91  | 0.494174 | 0.733896 | 0.069001 |
| Al | Al92  | 0.062017 | 0.404604 | 0.530611 |
| Al | Al93  | 0.720509 | 0.736623 | 0.859829 |
| Al | Al94  | 0.389816 | 0.070416 | 0.194253 |
| Al | Al95  | 0.595938 | 0.170749 | 0.529719 |
| Al | Al96  | 0.265420 | 0.503976 | 0.863608 |
| Al | Al97  | 0.933466 | 0.835260 | 0.194017 |
| Al | Al98  | 0.833260 | 0.956604 | 0.526384 |
| Al | Al99  | 0.495127 | 0.277950 | 0.862421 |
| Al | Al100 | 0.166172 | 0.614608 | 0.195969 |
| Si | Si101 | 0.930773 | 0.832771 | 0.405651 |
| P  | P102  | 0.061241 | 0.178705 | 0.526639 |
| P  | P103  | 0.721973 | 0.510679 | 0.854232 |
| P  | P104  | 0.392426 | 0.845040 | 0.191706 |
| P  | P105  | 0.830074 | 0.393616 | 0.523068 |
| P  | P106  | 0.489844 | 0.733367 | 0.858394 |
| P  | P107  | 0.159462 | 0.065608 | 0.192153 |
| P  | P108  | 0.598873 | 0.941235 | 0.526602 |
| P  | P109  | 0.268948 | 0.278091 | 0.858930 |
| P  | P110  | 0.937570 | 0.612544 | 0.186888 |
| P  | P111  | 0.597657 | 0.171757 | 0.736125 |
| P  | P112  | 0.269157 | 0.504606 | 0.073729 |
| P  | P113  | 0.164686 | 0.617334 | 0.404609 |
| P  | P114  | 0.829539 | 0.948264 | 0.737536 |
| P  | P115  | 0.499119 | 0.281228 | 0.071085 |
| P  | P116  | 0.390287 | 0.073843 | 0.404510 |
| P  | P117  | 0.055091 | 0.403208 | 0.738599 |
| P  | P118  | 0.724158 | 0.736802 | 0.070087 |

***TS-Methylation-ZCH3-C4-iso-Si-AlPO-34***

```

data_
_audit_creation_method      'Materials Studio'
_cell_length_a              13.885913
_cell_length_b              13.885913
_cell_length_c              15.094859
_cell_angle_alpha          90.000000
_cell_angle_beta           90.000000
_cell_angle_gamma          120.000000
_symmetry_space_group_name_H-M  'P1'
loop_
_atom_site_type_symbol
_atom_site_label
_atom_site_fract_x
_atom_site_fract_y
_atom_site_fract_z
  H      H1          0.709329      0.556829      0.417633
  H      H2          0.751406      0.595521      0.535038
  H      H3          0.724574      0.689066      0.463296
  H      H4          0.402954      0.559805      0.385738
  H      H5          0.537365      0.620473      0.340691
  H      H6          0.515958      0.670338      0.443407
  H      H7          0.497490      0.350406      0.435571
  H      H8          0.502298      0.418140      0.333607
  H      H9          0.380471      0.357724      0.397786
  H      H10         0.558280      0.463050      0.568213
  H      H11         0.569326      0.601418      0.571129
  C      C12         0.728811      0.614363      0.471728
  C      C13         0.553950      0.528882      0.532854
  C      C14         0.508053      0.510607      0.450187
  C      C15         0.491054      0.596137      0.403428
  C      C16         0.471695      0.403408      0.402087
  O      O17         0.086579      0.293686      0.504885
  O      O18         0.302179      0.400190      0.848070
  O      O19         0.828425      0.435190      0.621247
  O      O20         0.490551      0.152610      0.466064
  O      O21         0.736598      0.621720      0.831825
  O      O22         0.969509      0.731292      0.171556
  O      O23         0.498812      0.762202      0.959968
  O      O24         0.151731      0.478939      0.805018
  O      O25         0.409201      0.956612      0.172295
  O      O26         0.626827      0.060813      0.519138
  O      O27         0.164405      0.097964      0.293429
  O      O28         0.827727      0.817913      0.124564
  O      O29         0.718174      0.293668      0.504215

```

|   |     |          |          |          |
|---|-----|----------|----------|----------|
| 0 | 030 | 0.604562 | 0.418384 | 0.844713 |
| 0 | 031 | 0.569863 | 0.904111 | 0.628172 |
| 0 | 032 | 0.858280 | 0.865326 | 0.469446 |
| 0 | 033 | 0.379756 | 0.633423 | 0.838234 |
| 0 | 034 | 0.274162 | 0.752912 | 0.180823 |
| 0 | 035 | 0.242987 | 0.246456 | 0.960561 |
| 0 | 036 | 0.525262 | 0.190392 | 0.802965 |
| 0 | 037 | 0.051149 | 0.964631 | 0.171068 |
| 0 | 038 | 0.937210 | 0.095001 | 0.521024 |
| 0 | 039 | 0.908100 | 0.581018 | 0.288439 |
| 0 | 040 | 0.193838 | 0.523229 | 0.137286 |
| 0 | 041 | 0.704371 | 0.934502 | 0.504873 |
| 0 | 042 | 0.583655 | 0.703022 | 0.838699 |
| 0 | 043 | 0.098854 | 0.176916 | 0.626997 |
| 0 | 044 | 0.144867 | 0.518262 | 0.468054 |
| 0 | 045 | 0.371794 | 0.266442 | 0.835588 |
| 0 | 046 | 0.255216 | 0.036572 | 0.179057 |
| 0 | 047 | 0.759892 | 0.512565 | 0.955592 |
| 0 | 048 | 0.815147 | 0.851070 | 0.801241 |
| 0 | 049 | 0.041111 | 0.598450 | 0.168276 |
| 0 | 050 | 0.920752 | 0.358603 | 0.521898 |
| 0 | 051 | 0.428319 | 0.842196 | 0.293244 |
| 0 | 052 | 0.484831 | 0.183963 | 0.133904 |
| 0 | 053 | 0.897728 | 0.702844 | 0.438928 |
| 0 | 054 | 0.697095 | 0.614861 | 0.091358 |
| 0 | 055 | 0.169147 | 0.582566 | 0.311907 |
| 0 | 056 | 0.505267 | 0.861751 | 0.471720 |
| 0 | 057 | 0.589419 | 0.059429 | 0.761930 |
| 0 | 058 | 0.365435 | 0.951696 | 0.423444 |
| 0 | 059 | 0.829981 | 0.916868 | 0.645944 |
| 0 | 060 | 0.172720 | 0.200260 | 0.805846 |
| 0 | 061 | 0.258670 | 0.391042 | 0.102047 |
| 0 | 062 | 0.026763 | 0.281347 | 0.754478 |
| 0 | 063 | 0.499221 | 0.249192 | 0.978133 |
| 0 | 064 | 0.843140 | 0.529775 | 0.132667 |
| 0 | 065 | 0.280653 | 0.715311 | 0.434003 |
| 0 | 066 | 0.392873 | 0.594491 | 0.092499 |
| 0 | 067 | 0.424932 | 0.105164 | 0.310861 |
| 0 | 068 | 0.130446 | 0.144955 | 0.469498 |
| 0 | 069 | 0.945270 | 0.049449 | 0.767003 |
| 0 | 070 | 0.062815 | 0.915313 | 0.418133 |
| 0 | 071 | 0.098931 | 0.439878 | 0.645731 |
| 0 | 072 | 0.803891 | 0.490811 | 0.799103 |
| 0 | 073 | 0.615367 | 0.382082 | 0.098408 |

|    |       |          |          |          |
|----|-------|----------|----------|----------|
| O  | O74   | 0.723495 | 0.263246 | 0.753017 |
| O  | O75   | 0.745788 | 0.761711 | 0.974657 |
| O  | O76   | 0.473349 | 0.823558 | 0.136506 |
| O  | O77   | 0.292475 | 0.083914 | 0.433770 |
| O  | O78   | 0.411221 | 0.311437 | 0.093941 |
| O  | O79   | 0.892090 | 0.823150 | 0.304709 |
| O  | O80   | 0.855223 | 0.484770 | 0.460447 |
| O  | O81   | 0.957337 | 0.415781 | 0.761287 |
| O  | O82   | 0.078400 | 0.650098 | 0.421067 |
| O  | O83   | 0.564989 | 0.174883 | 0.644671 |
| O  | O84   | 0.510473 | 0.832728 | 0.806539 |
| O  | O85   | 0.625331 | 0.746674 | 0.104225 |
| O  | O86   | 0.740674 | 0.977731 | 0.761455 |
| O  | O87   | 0.237737 | 0.503964 | 0.980745 |
| O  | O88   | 0.181496 | 0.163081 | 0.137562 |
| Al | Al89  | 0.937931 | 0.608375 | 0.401854 |
| Al | Al90  | 0.602796 | 0.943442 | 0.739730 |
| Al | Al91  | 0.272442 | 0.276596 | 0.073636 |
| Al | Al92  | 0.394586 | 0.844035 | 0.405284 |
| Al | Al93  | 0.060945 | 0.176326 | 0.738201 |
| Al | Al94  | 0.729841 | 0.510245 | 0.069185 |
| Al | Al95  | 0.157324 | 0.054801 | 0.405078 |
| Al | Al96  | 0.828804 | 0.401476 | 0.734200 |
| Al | Al97  | 0.497889 | 0.732761 | 0.073155 |
| Al | Al98  | 0.063238 | 0.402274 | 0.534074 |
| Al | Al99  | 0.720964 | 0.734878 | 0.861733 |
| Al | Al100 | 0.392944 | 0.070270 | 0.198615 |
| Al | Al101 | 0.599499 | 0.169472 | 0.533569 |
| Al | Al102 | 0.267525 | 0.504137 | 0.867800 |
| Al | Al103 | 0.934712 | 0.835415 | 0.196816 |
| Al | Al104 | 0.835357 | 0.952817 | 0.532944 |
| Al | Al105 | 0.499676 | 0.280586 | 0.865635 |
| Al | Al106 | 0.169033 | 0.614539 | 0.199167 |
| Si | Si107 | 0.930418 | 0.831763 | 0.406724 |
| P  | P108  | 0.062855 | 0.176467 | 0.530245 |
| P  | P109  | 0.726111 | 0.510575 | 0.858449 |
| P  | P110  | 0.395942 | 0.843638 | 0.195913 |
| P  | P111  | 0.831605 | 0.393141 | 0.527178 |
| P  | P112  | 0.493424 | 0.732772 | 0.861377 |
| P  | P113  | 0.162501 | 0.064877 | 0.196154 |
| P  | P114  | 0.601949 | 0.940764 | 0.531366 |
| P  | P115  | 0.272182 | 0.278535 | 0.862904 |
| P  | P116  | 0.940647 | 0.611422 | 0.190651 |
| P  | P117  | 0.601200 | 0.172188 | 0.740564 |



|   |      |          |          |          |
|---|------|----------|----------|----------|
| P | P118 | 0.271079 | 0.503452 | 0.077705 |
| P | P119 | 0.167684 | 0.616585 | 0.408540 |
| P | P120 | 0.832698 | 0.948993 | 0.743280 |
| P | P121 | 0.502328 | 0.281602 | 0.075851 |
| P | P122 | 0.392222 | 0.072285 | 0.408115 |
| P | P123 | 0.058703 | 0.403577 | 0.741363 |
| P | P124 | 0.724623 | 0.735423 | 0.073797 |

***TS-Methylation-ZCH3-TME-Si-ALPO-34***

|                                |     |                    |          |          |
|--------------------------------|-----|--------------------|----------|----------|
| data_                          |     |                    |          |          |
| _audit_creation_method         |     | 'Materials Studio' |          |          |
| _cell_length_a                 |     | 13.885913          |          |          |
| _cell_length_b                 |     | 13.885913          |          |          |
| _cell_length_c                 |     | 15.094859          |          |          |
| _cell_angle_alpha              |     | 90.000000          |          |          |
| _cell_angle_beta               |     | 90.000000          |          |          |
| _cell_angle_gamma              |     | 120.000000         |          |          |
| _symmetry_space_group_name_H-M |     | 'P1'               |          |          |
| loop_                          |     |                    |          |          |
| _atom_site_type_symbol         |     |                    |          |          |
| _atom_site_label               |     |                    |          |          |
| _atom_site_fract_x             |     |                    |          |          |
| _atom_site_fract_y             |     |                    |          |          |
| _atom_site_fract_z             |     |                    |          |          |
| H                              | H1  | 0.705927           | 0.560299 | 0.406751 |
| H                              | H2  | 0.741255           | 0.585808 | 0.526452 |
| H                              | H3  | 0.720946           | 0.688216 | 0.461039 |
| H                              | H4  | 0.411744           | 0.565687 | 0.389218 |
| H                              | H5  | 0.541278           | 0.613749 | 0.337495 |
| H                              | H6  | 0.531961           | 0.679534 | 0.435020 |
| H                              | H7  | 0.522615           | 0.364049 | 0.424425 |
| H                              | H8  | 0.493308           | 0.424650 | 0.332601 |
| H                              | H9  | 0.390756           | 0.351724 | 0.413666 |
| H                              | H10 | 0.603705           | 0.464877 | 0.647661 |
| H                              | H11 | 0.547276           | 0.371122 | 0.557175 |
| H                              | H12 | 0.459059           | 0.387657 | 0.631869 |
| H                              | H13 | 0.493703           | 0.592237 | 0.650586 |
| H                              | H14 | 0.558270           | 0.689413 | 0.564101 |
| H                              | H15 | 0.638135           | 0.656349 | 0.636475 |
| C                              | C16 | 0.724879           | 0.612898 | 0.464251 |
| C                              | C17 | 0.538945           | 0.432055 | 0.596683 |
| C                              | C18 | 0.559390           | 0.622224 | 0.600127 |

|   |     |          |          |          |
|---|-----|----------|----------|----------|
| C | C19 | 0.541999 | 0.525500 | 0.543260 |
| C | C20 | 0.515217 | 0.514945 | 0.454474 |
| C | C21 | 0.500833 | 0.599596 | 0.402376 |
| C | C22 | 0.480254 | 0.408498 | 0.403807 |
| O | O23 | 0.086332 | 0.293296 | 0.504257 |
| O | O24 | 0.302063 | 0.400230 | 0.847744 |
| O | O25 | 0.829520 | 0.435743 | 0.621194 |
| O | O26 | 0.489673 | 0.153105 | 0.466838 |
| O | O27 | 0.736592 | 0.621646 | 0.830604 |
| O | O28 | 0.969263 | 0.731296 | 0.171801 |
| O | O29 | 0.498152 | 0.762358 | 0.959781 |
| O | O30 | 0.152512 | 0.479653 | 0.804249 |
| O | O31 | 0.409945 | 0.957021 | 0.172963 |
| O | O32 | 0.626244 | 0.060582 | 0.516345 |
| O | O33 | 0.162711 | 0.095509 | 0.293489 |
| O | O34 | 0.827737 | 0.818108 | 0.124464 |
| O | O35 | 0.717525 | 0.293409 | 0.505187 |
| O | O36 | 0.605140 | 0.418610 | 0.845844 |
| O | O37 | 0.570193 | 0.906989 | 0.628410 |
| O | O38 | 0.857280 | 0.865237 | 0.469132 |
| O | O39 | 0.380453 | 0.633096 | 0.837628 |
| O | O40 | 0.274522 | 0.753322 | 0.181050 |
| O | O41 | 0.244016 | 0.246818 | 0.960539 |
| O | O42 | 0.525627 | 0.191191 | 0.802490 |
| O | O43 | 0.051617 | 0.964507 | 0.169397 |
| O | O44 | 0.936861 | 0.094956 | 0.522091 |
| O | O45 | 0.908345 | 0.580412 | 0.288072 |
| O | O46 | 0.194377 | 0.523777 | 0.137363 |
| O | O47 | 0.703862 | 0.934188 | 0.505371 |
| O | O48 | 0.584226 | 0.703153 | 0.839403 |
| O | O49 | 0.099855 | 0.177889 | 0.626856 |
| O | O50 | 0.144020 | 0.518403 | 0.467999 |
| O | O51 | 0.372695 | 0.267505 | 0.835053 |
| O | O52 | 0.255623 | 0.036563 | 0.179071 |
| O | O53 | 0.761507 | 0.514812 | 0.955515 |
| O | O54 | 0.815647 | 0.851235 | 0.801387 |
| O | O55 | 0.041516 | 0.599108 | 0.167475 |
| O | O56 | 0.920257 | 0.358115 | 0.521263 |
| O | O57 | 0.428561 | 0.841957 | 0.293622 |
| O | O58 | 0.485223 | 0.184361 | 0.134354 |
| O | O59 | 0.893693 | 0.700937 | 0.437575 |
| O | O60 | 0.696910 | 0.614775 | 0.091999 |
| O | O61 | 0.167524 | 0.583042 | 0.311998 |
| O | O62 | 0.504361 | 0.860231 | 0.472626 |

|    |       |          |          |          |
|----|-------|----------|----------|----------|
| 0  | 063   | 0.590391 | 0.059898 | 0.764442 |
| 0  | 064   | 0.366434 | 0.952094 | 0.423794 |
| 0  | 065   | 0.829812 | 0.916212 | 0.646006 |
| 0  | 066   | 0.173280 | 0.200050 | 0.805855 |
| 0  | 067   | 0.258619 | 0.391171 | 0.101622 |
| 0  | 068   | 0.027643 | 0.281516 | 0.755000 |
| 0  | 069   | 0.498270 | 0.247890 | 0.978187 |
| 0  | 070   | 0.843419 | 0.529871 | 0.132311 |
| 0  | 071   | 0.279363 | 0.715629 | 0.434069 |
| 0  | 072   | 0.393189 | 0.594580 | 0.092135 |
| 0  | 073   | 0.424812 | 0.105500 | 0.311362 |
| 0  | 074   | 0.129241 | 0.143543 | 0.469414 |
| 0  | 075   | 0.945860 | 0.049445 | 0.766535 |
| 0  | 076   | 0.061568 | 0.913442 | 0.419103 |
| 0  | 077   | 0.098618 | 0.438943 | 0.645263 |
| 0  | 078   | 0.804016 | 0.490610 | 0.799085 |
| 0  | 079   | 0.615970 | 0.381926 | 0.097215 |
| 0  | 080   | 0.723685 | 0.263506 | 0.752316 |
| 0  | 081   | 0.746725 | 0.760909 | 0.974583 |
| 0  | 082   | 0.473609 | 0.823695 | 0.136714 |
| 0  | 083   | 0.291311 | 0.082480 | 0.434004 |
| 0  | 084   | 0.411874 | 0.311979 | 0.093902 |
| 0  | 085   | 0.892563 | 0.824735 | 0.304220 |
| 0  | 086   | 0.853968 | 0.483960 | 0.460142 |
| 0  | 087   | 0.957687 | 0.415541 | 0.761283 |
| 0  | 088   | 0.076920 | 0.650036 | 0.421873 |
| 0  | 089   | 0.564450 | 0.171782 | 0.644862 |
| 0  | 090   | 0.510935 | 0.832376 | 0.805969 |
| 0  | 091   | 0.625614 | 0.747143 | 0.103308 |
| 0  | 092   | 0.741254 | 0.977896 | 0.761472 |
| 0  | 093   | 0.237823 | 0.504454 | 0.980596 |
| 0  | 094   | 0.182378 | 0.163611 | 0.138166 |
| Al | Al95  | 0.936385 | 0.607667 | 0.401680 |
| Al | Al96  | 0.603468 | 0.944200 | 0.740199 |
| Al | Al97  | 0.272980 | 0.276902 | 0.073834 |
| Al | Al98  | 0.394389 | 0.843634 | 0.405593 |
| Al | Al99  | 0.061604 | 0.176446 | 0.738105 |
| Al | Al100 | 0.730166 | 0.510666 | 0.069064 |
| Al | Al101 | 0.156070 | 0.053027 | 0.405286 |
| Al | Al102 | 0.829369 | 0.401648 | 0.734030 |
| Al | Al103 | 0.497920 | 0.732999 | 0.073026 |
| Al | Al104 | 0.062783 | 0.401815 | 0.533478 |
| Al | Al105 | 0.721614 | 0.734915 | 0.861780 |
| Al | Al106 | 0.393367 | 0.070581 | 0.199066 |

|    |       |          |          |          |
|----|-------|----------|----------|----------|
| Al | Al107 | 0.598933 | 0.168739 | 0.533414 |
| Al | Al108 | 0.267644 | 0.504351 | 0.867725 |
| Al | Al109 | 0.935005 | 0.835899 | 0.196401 |
| Al | Al110 | 0.834983 | 0.952673 | 0.533137 |
| Al | Al111 | 0.500010 | 0.280693 | 0.865942 |
| Al | Al112 | 0.169132 | 0.614968 | 0.199115 |
| Si | Si113 | 0.929024 | 0.831214 | 0.406500 |
| P  | P114  | 0.062698 | 0.176267 | 0.530217 |
| P  | P115  | 0.726773 | 0.511089 | 0.858486 |
| P  | P116  | 0.396352 | 0.843826 | 0.196299 |
| P  | P117  | 0.831322 | 0.392909 | 0.527160 |
| P  | P118  | 0.493751 | 0.732776 | 0.861340 |
| P  | P119  | 0.162570 | 0.064435 | 0.195930 |
| P  | P120  | 0.601570 | 0.941037 | 0.531094 |
| P  | P121  | 0.272690 | 0.278756 | 0.862825 |
| P  | P122  | 0.940840 | 0.611469 | 0.190371 |
| P  | P123  | 0.601479 | 0.171852 | 0.740903 |
| P  | P124  | 0.271287 | 0.503757 | 0.077578 |
| P  | P125  | 0.166408 | 0.616816 | 0.408733 |
| P  | P126  | 0.833128 | 0.948976 | 0.743210 |
| P  | P127  | 0.502493 | 0.281482 | 0.075769 |
| P  | P128  | 0.391941 | 0.072285 | 0.408540 |
| P  | P129  | 0.059104 | 0.403506 | 0.741134 |
| P  | P130  | 0.724800 | 0.735324 | 0.073759 |

***TS-Methylation-ZCH3-CO-Si-AIPO-34***

|                                |    |                    |          |          |
|--------------------------------|----|--------------------|----------|----------|
| data_                          |    |                    |          |          |
| _audit_creation_method         |    | 'Materials Studio' |          |          |
| _cell_length_a                 |    | 13.885913          |          |          |
| _cell_length_b                 |    | 13.885913          |          |          |
| _cell_length_c                 |    | 15.094859          |          |          |
| _cell_angle_alpha              |    | 90.000000          |          |          |
| _cell_angle_beta               |    | 90.000000          |          |          |
| _cell_angle_gamma              |    | 120.000000         |          |          |
| _symmetry_space_group_name_H-M |    | 'P1'               |          |          |
| loop_                          |    |                    |          |          |
| _atom_site_type_symbol         |    |                    |          |          |
| _atom_site_label               |    |                    |          |          |
| _atom_site_fract_x             |    |                    |          |          |
| _atom_site_fract_y             |    |                    |          |          |
| _atom_site_fract_z             |    |                    |          |          |
| H                              | H1 | 0.722271           | 0.568252 | 0.491313 |

|   |     |          |          |          |
|---|-----|----------|----------|----------|
| H | H2  | 0.826543 | 0.627192 | 0.582021 |
| H | H3  | 0.770472 | 0.712997 | 0.532148 |
| C | C4  | 0.770963 | 0.635441 | 0.536774 |
| C | C5  | 0.643732 | 0.573783 | 0.621331 |
| O | O6  | 0.079384 | 0.291866 | 0.499174 |
| O | O7  | 0.296194 | 0.397499 | 0.841942 |
| O | O8  | 0.823204 | 0.433982 | 0.615858 |
| O | O9  | 0.484331 | 0.151793 | 0.459644 |
| O | O10 | 0.730579 | 0.619790 | 0.826881 |
| O | O11 | 0.964493 | 0.729259 | 0.163183 |
| O | O12 | 0.491394 | 0.760352 | 0.954121 |
| O | O13 | 0.146581 | 0.477187 | 0.798910 |
| O | O14 | 0.401582 | 0.953906 | 0.164132 |
| O | O15 | 0.618054 | 0.058259 | 0.514138 |
| O | O16 | 0.156017 | 0.094014 | 0.287592 |
| O | O17 | 0.819958 | 0.814429 | 0.122602 |
| O | O18 | 0.712119 | 0.291312 | 0.499671 |
| O | O19 | 0.598854 | 0.416254 | 0.839117 |
| O | O20 | 0.564081 | 0.900975 | 0.621870 |
| O | O21 | 0.847994 | 0.859719 | 0.463970 |
| O | O22 | 0.375539 | 0.630553 | 0.831622 |
| O | O23 | 0.267143 | 0.750259 | 0.175122 |
| O | O24 | 0.236507 | 0.243600 | 0.954511 |
| O | O25 | 0.519876 | 0.187945 | 0.797827 |
| O | O26 | 0.044028 | 0.962085 | 0.164628 |
| O | O27 | 0.932319 | 0.092540 | 0.514281 |
| O | O28 | 0.902202 | 0.582502 | 0.282942 |
| O | O29 | 0.187532 | 0.521217 | 0.130681 |
| O | O30 | 0.699236 | 0.935832 | 0.498211 |
| O | O31 | 0.579700 | 0.702078 | 0.835037 |
| O | O32 | 0.093005 | 0.175710 | 0.621022 |
| O | O33 | 0.138948 | 0.517123 | 0.462883 |
| O | O34 | 0.366012 | 0.264088 | 0.829736 |
| O | O35 | 0.248216 | 0.033998 | 0.173351 |
| O | O36 | 0.755186 | 0.509856 | 0.949748 |
| O | O37 | 0.809548 | 0.847445 | 0.793299 |
| O | O38 | 0.033877 | 0.594598 | 0.163216 |
| O | O39 | 0.914951 | 0.357444 | 0.515824 |
| O | O40 | 0.421783 | 0.842345 | 0.286855 |
| O | O41 | 0.478083 | 0.181826 | 0.128291 |
| O | O42 | 0.896247 | 0.702488 | 0.440524 |
| O | O43 | 0.690891 | 0.612872 | 0.082973 |
| O | O44 | 0.161875 | 0.579524 | 0.306135 |
| O | O45 | 0.499216 | 0.859329 | 0.465377 |

|    |      |          |          |          |
|----|------|----------|----------|----------|
| O  | 046  | 0.583892 | 0.057186 | 0.755084 |
| O  | 047  | 0.360143 | 0.949996 | 0.419400 |
| O  | 048  | 0.822957 | 0.913048 | 0.638534 |
| O  | 049  | 0.166784 | 0.197513 | 0.799718 |
| O  | 050  | 0.251605 | 0.388440 | 0.095229 |
| O  | 051  | 0.020933 | 0.279181 | 0.749327 |
| O  | 052  | 0.493093 | 0.245935 | 0.972236 |
| O  | 053  | 0.836234 | 0.527220 | 0.127707 |
| O  | 054  | 0.273704 | 0.713953 | 0.427349 |
| O  | 055  | 0.386634 | 0.591845 | 0.086000 |
| O  | 056  | 0.418382 | 0.100603 | 0.304691 |
| O  | 057  | 0.126521 | 0.145765 | 0.463618 |
| O  | 058  | 0.939387 | 0.046328 | 0.759350 |
| O  | 059  | 0.055642 | 0.916287 | 0.417308 |
| O  | 060  | 0.092104 | 0.437461 | 0.640154 |
| O  | 061  | 0.797480 | 0.489509 | 0.791807 |
| O  | 062  | 0.609012 | 0.379645 | 0.091657 |
| O  | 063  | 0.717728 | 0.261008 | 0.747257 |
| O  | 064  | 0.745834 | 0.764404 | 0.969854 |
| O  | 065  | 0.466298 | 0.820795 | 0.130639 |
| O  | 066  | 0.286081 | 0.081236 | 0.427263 |
| O  | 067  | 0.404800 | 0.309154 | 0.086830 |
| O  | 068  | 0.890374 | 0.816933 | 0.300866 |
| O  | 069  | 0.847531 | 0.482654 | 0.454993 |
| O  | 070  | 0.951699 | 0.413811 | 0.756503 |
| O  | 071  | 0.071195 | 0.647082 | 0.415165 |
| O  | 072  | 0.558699 | 0.173902 | 0.639214 |
| O  | 073  | 0.505315 | 0.830228 | 0.800260 |
| O  | 074  | 0.619318 | 0.744987 | 0.096161 |
| O  | 075  | 0.734858 | 0.974583 | 0.754898 |
| O  | 076  | 0.231804 | 0.502254 | 0.974243 |
| O  | 077  | 0.174903 | 0.160713 | 0.131848 |
| O  | 078  | 0.558417 | 0.542555 | 0.651912 |
| Al | Al79 | 0.931009 | 0.606591 | 0.396404 |
| Al | Al80 | 0.596939 | 0.940900 | 0.733137 |
| Al | Al81 | 0.265845 | 0.274107 | 0.067776 |
| Al | Al82 | 0.388518 | 0.842093 | 0.399191 |
| Al | Al83 | 0.055179 | 0.174256 | 0.732134 |
| Al | Al84 | 0.723592 | 0.507828 | 0.063583 |
| Al | Al85 | 0.151694 | 0.054282 | 0.399776 |
| Al | Al86 | 0.823232 | 0.398851 | 0.728781 |
| Al | Al87 | 0.491086 | 0.730318 | 0.067320 |
| Al | Al88 | 0.057521 | 0.401018 | 0.528187 |
| Al | Al89 | 0.717165 | 0.734563 | 0.857952 |

|    |      |          |          |          |
|----|------|----------|----------|----------|
| Al | Al90 | 0.386046 | 0.067543 | 0.192455 |
| Al | Al91 | 0.591994 | 0.167684 | 0.527757 |
| Al | Al92 | 0.262310 | 0.501994 | 0.861690 |
| Al | Al93 | 0.929490 | 0.832238 | 0.191940 |
| Al | Al94 | 0.828864 | 0.951676 | 0.525571 |
| Al | Al95 | 0.493634 | 0.277911 | 0.860177 |
| Al | Al96 | 0.162510 | 0.611708 | 0.193497 |
| Si | Si97 | 0.924684 | 0.828678 | 0.403775 |
| P  | P98  | 0.057685 | 0.175464 | 0.524110 |
| P  | P99  | 0.720448 | 0.508314 | 0.853174 |
| P  | P100 | 0.388885 | 0.841598 | 0.189482 |
| P  | P101 | 0.825389 | 0.391063 | 0.521487 |
| P  | P102 | 0.488113 | 0.730799 | 0.855886 |
| P  | P103 | 0.155418 | 0.062182 | 0.190272 |
| P  | P104 | 0.595178 | 0.938774 | 0.525072 |
| P  | P105 | 0.266097 | 0.275839 | 0.856999 |
| P  | P106 | 0.934507 | 0.609606 | 0.184753 |
| P  | P107 | 0.595271 | 0.169999 | 0.734655 |
| P  | P108 | 0.264745 | 0.501200 | 0.071331 |
| P  | P109 | 0.161153 | 0.614485 | 0.402520 |
| P  | P110 | 0.826706 | 0.945949 | 0.736004 |
| P  | P111 | 0.495819 | 0.279088 | 0.069800 |
| P  | P112 | 0.386143 | 0.070058 | 0.402251 |
| P  | P113 | 0.052978 | 0.401440 | 0.735908 |
| P  | P114 | 0.719469 | 0.734165 | 0.068356 |

***TS-Methylation-ZCH3-H2O-Si-AlPO-34***

```

data_
_audit_creation_method      'Materials Studio'
_cell_length_a              13.885913
_cell_length_b              13.885913
_cell_length_c              15.094859
_cell_angle_alpha           90.000000
_cell_angle_beta            90.000000
_cell_angle_gamma           120.000000
_symmetry_space_group_name_H-M  'P1'
loop_
_atom_site_type_symbol
_atom_site_label
_atom_site_fract_x
_atom_site_fract_y
_atom_site_fract_z

```

|   |     |          |          |          |
|---|-----|----------|----------|----------|
| H | H1  | 0.694258 | 0.603522 | 0.698450 |
| H | H2  | 0.720233 | 0.615190 | 0.496545 |
| H | H3  | 0.814943 | 0.596989 | 0.572620 |
| H | H4  | 0.816447 | 0.732163 | 0.569275 |
| H | H5  | 0.618042 | 0.620025 | 0.630980 |
| C | C6  | 0.781363 | 0.647053 | 0.548642 |
| O | O7  | 0.083934 | 0.294746 | 0.502376 |
| O | O8  | 0.298337 | 0.399004 | 0.842224 |
| O | O9  | 0.827283 | 0.434294 | 0.617431 |
| O | O10 | 0.488071 | 0.155000 | 0.460788 |
| O | O11 | 0.727968 | 0.618758 | 0.820888 |
| O | O12 | 0.966961 | 0.729699 | 0.163745 |
| O | O13 | 0.494195 | 0.762190 | 0.955759 |
| O | O14 | 0.148137 | 0.478117 | 0.801079 |
| O | O15 | 0.404119 | 0.955199 | 0.164219 |
| O | O16 | 0.619245 | 0.058736 | 0.517273 |
| O | O17 | 0.157986 | 0.097141 | 0.288027 |
| O | O18 | 0.823704 | 0.815955 | 0.122864 |
| O | O19 | 0.716379 | 0.291172 | 0.501277 |
| O | O20 | 0.600606 | 0.415900 | 0.844057 |
| O | O21 | 0.565497 | 0.899479 | 0.622898 |
| O | O22 | 0.855239 | 0.866380 | 0.463792 |
| O | O23 | 0.377306 | 0.631798 | 0.833715 |
| O | O24 | 0.269432 | 0.751497 | 0.175543 |
| O | O25 | 0.241160 | 0.246853 | 0.955902 |
| O | O26 | 0.521331 | 0.187920 | 0.799164 |
| O | O27 | 0.047701 | 0.963123 | 0.165406 |
| O | O28 | 0.934354 | 0.096309 | 0.517296 |
| O | O29 | 0.902642 | 0.583694 | 0.284442 |
| O | O30 | 0.190793 | 0.522788 | 0.132555 |
| O | O31 | 0.701470 | 0.937267 | 0.499373 |
| O | O32 | 0.581491 | 0.703508 | 0.836086 |
| O | O33 | 0.096018 | 0.176212 | 0.622896 |
| O | O34 | 0.144700 | 0.519899 | 0.465046 |
| O | O35 | 0.367788 | 0.265386 | 0.829492 |
| O | O36 | 0.251881 | 0.036147 | 0.176010 |
| O | O37 | 0.760023 | 0.521481 | 0.950175 |
| O | O38 | 0.811024 | 0.847689 | 0.794035 |
| O | O39 | 0.035897 | 0.594581 | 0.166488 |
| O | O40 | 0.919685 | 0.361296 | 0.514815 |
| O | O41 | 0.422466 | 0.844450 | 0.288521 |
| O | O42 | 0.481817 | 0.183859 | 0.129947 |
| O | O43 | 0.901610 | 0.706638 | 0.442908 |
| O | O44 | 0.692196 | 0.613073 | 0.088667 |



|    |      |          |          |          |
|----|------|----------|----------|----------|
| O  | 045  | 0.167188 | 0.582106 | 0.308139 |
| O  | 046  | 0.501400 | 0.860831 | 0.466028 |
| O  | 047  | 0.585421 | 0.057668 | 0.755180 |
| O  | 048  | 0.362765 | 0.953200 | 0.422120 |
| O  | 049  | 0.825049 | 0.914068 | 0.639337 |
| O  | 050  | 0.167787 | 0.198305 | 0.802303 |
| O  | 051  | 0.255109 | 0.390041 | 0.097534 |
| O  | 052  | 0.023134 | 0.280362 | 0.750262 |
| O  | 053  | 0.490502 | 0.242566 | 0.973063 |
| O  | 054  | 0.839080 | 0.527731 | 0.128438 |
| O  | 055  | 0.274669 | 0.717720 | 0.429818 |
| O  | 056  | 0.389823 | 0.593358 | 0.087195 |
| O  | 057  | 0.423694 | 0.102059 | 0.305767 |
| O  | 058  | 0.127483 | 0.146625 | 0.464833 |
| O  | 059  | 0.940865 | 0.047107 | 0.760699 |
| O  | 060  | 0.061180 | 0.918775 | 0.416690 |
| O  | 061  | 0.093095 | 0.439917 | 0.642364 |
| O  | 062  | 0.798435 | 0.489630 | 0.793514 |
| O  | 063  | 0.613041 | 0.379733 | 0.087923 |
| O  | 064  | 0.719359 | 0.261542 | 0.749272 |
| O  | 065  | 0.747870 | 0.759191 | 0.970987 |
| O  | 066  | 0.469225 | 0.821807 | 0.133214 |
| O  | 067  | 0.290611 | 0.086488 | 0.426424 |
| O  | 068  | 0.409040 | 0.311775 | 0.088728 |
| O  | 069  | 0.894084 | 0.818205 | 0.301780 |
| O  | 070  | 0.847725 | 0.484134 | 0.456938 |
| O  | 071  | 0.952891 | 0.413990 | 0.759857 |
| O  | 072  | 0.071182 | 0.644817 | 0.416138 |
| O  | 073  | 0.560967 | 0.175995 | 0.640481 |
| O  | 074  | 0.506805 | 0.831357 | 0.801703 |
| O  | 075  | 0.623114 | 0.747672 | 0.096337 |
| O  | 076  | 0.736140 | 0.974608 | 0.755966 |
| O  | 077  | 0.234300 | 0.502686 | 0.976160 |
| O  | 078  | 0.178193 | 0.161497 | 0.131588 |
| O  | 079  | 0.664616 | 0.586636 | 0.637634 |
| Al | Al80 | 0.931542 | 0.608051 | 0.398294 |
| Al | Al81 | 0.598332 | 0.941345 | 0.733796 |
| Al | Al82 | 0.269857 | 0.276224 | 0.069309 |
| Al | Al83 | 0.390081 | 0.844792 | 0.401035 |
| Al | Al84 | 0.057137 | 0.175182 | 0.733566 |
| Al | Al85 | 0.726757 | 0.510206 | 0.064915 |
| Al | Al86 | 0.155063 | 0.057320 | 0.400162 |
| Al | Al87 | 0.824956 | 0.399075 | 0.730185 |
| Al | Al88 | 0.493967 | 0.731993 | 0.069115 |

|    |      |          |          |          |
|----|------|----------|----------|----------|
| Al | Al89 | 0.061388 | 0.403889 | 0.529874 |
| Al | Al90 | 0.718643 | 0.735320 | 0.859114 |
| Al | Al91 | 0.389692 | 0.069214 | 0.193864 |
| Al | Al92 | 0.594788 | 0.169536 | 0.529233 |
| Al | Al93 | 0.264021 | 0.502872 | 0.863458 |
| Al | Al94 | 0.933013 | 0.833392 | 0.193010 |
| Al | Al95 | 0.831951 | 0.954426 | 0.526059 |
| Al | Al96 | 0.493930 | 0.276934 | 0.861335 |
| Al | Al97 | 0.165376 | 0.612991 | 0.195580 |
| Si | Si98 | 0.929581 | 0.831490 | 0.404720 |
| P  | P99  | 0.060321 | 0.177421 | 0.526224 |
| P  | P100 | 0.721633 | 0.509583 | 0.853897 |
| P  | P101 | 0.390913 | 0.843000 | 0.190745 |
| P  | P102 | 0.828546 | 0.392578 | 0.522325 |
| P  | P103 | 0.489779 | 0.732266 | 0.857590 |
| P  | P104 | 0.158500 | 0.063899 | 0.191300 |
| P  | P105 | 0.597008 | 0.939384 | 0.526377 |
| P  | P106 | 0.268432 | 0.277489 | 0.857982 |
| P  | P107 | 0.936494 | 0.610166 | 0.186546 |
| P  | P108 | 0.596988 | 0.170803 | 0.735661 |
| P  | P109 | 0.267793 | 0.502499 | 0.073251 |
| P  | P110 | 0.163842 | 0.616155 | 0.404433 |
| P  | P111 | 0.828461 | 0.946780 | 0.736818 |
| P  | P112 | 0.498162 | 0.279460 | 0.070104 |
| P  | P113 | 0.390032 | 0.073385 | 0.403337 |
| P  | P114 | 0.054483 | 0.402602 | 0.737948 |
| P  | P115 | 0.722164 | 0.734121 | 0.070493 |

***TS-Methylation-ZCH3-NH3-Si-ALPO-34***

```

data_
_audit_creation_method      'Materials Studio'
_cell_length_a              13.885913
_cell_length_b              13.885913
_cell_length_c              15.094859
_cell_angle_alpha           90.000000
_cell_angle_beta            90.000000
_cell_angle_gamma           120.000000
_symmetry_space_group_name_H-M  'P1'
loop_
_atom_site_type_symbol
_atom_site_label
_atom_site_fract_x

```

\_atom\_site\_fract\_y

\_atom\_site\_fract\_z

|   |     |          |          |          |
|---|-----|----------|----------|----------|
| H | H1  | 0.586542 | 0.497740 | 0.614508 |
| H | H2  | 0.719874 | 0.621569 | 0.480332 |
| H | H3  | 0.802436 | 0.588880 | 0.559407 |
| H | H4  | 0.810563 | 0.726246 | 0.563510 |
| H | H5  | 0.596290 | 0.620772 | 0.616218 |
| H | H6  | 0.666567 | 0.590880 | 0.688252 |
| C | C7  | 0.781699 | 0.647394 | 0.531632 |
| N | N8  | 0.639758 | 0.580271 | 0.624398 |
| O | O9  | 0.086043 | 0.295324 | 0.501353 |
| O | O10 | 0.299777 | 0.399128 | 0.845206 |
| O | O11 | 0.828138 | 0.434939 | 0.618473 |
| O | O12 | 0.489748 | 0.153524 | 0.461733 |
| O | O13 | 0.733800 | 0.621036 | 0.831178 |
| O | O14 | 0.968103 | 0.730410 | 0.164103 |
| O | O15 | 0.494321 | 0.761435 | 0.957083 |
| O | O16 | 0.150462 | 0.478819 | 0.801648 |
| O | O17 | 0.403635 | 0.954777 | 0.165502 |
| O | O18 | 0.623324 | 0.060550 | 0.519490 |
| O | O19 | 0.160028 | 0.097706 | 0.290041 |
| O | O20 | 0.823017 | 0.816018 | 0.126671 |
| O | O21 | 0.716838 | 0.293056 | 0.501913 |
| O | O22 | 0.603047 | 0.417493 | 0.842115 |
| O | O23 | 0.568013 | 0.900520 | 0.624484 |
| O | O24 | 0.860020 | 0.870918 | 0.463924 |
| O | O25 | 0.379801 | 0.632082 | 0.833892 |
| O | O26 | 0.269807 | 0.751190 | 0.178435 |
| O | O27 | 0.240618 | 0.244426 | 0.956855 |
| O | O28 | 0.523480 | 0.188792 | 0.801034 |
| O | O29 | 0.047516 | 0.963634 | 0.168188 |
| O | O30 | 0.934951 | 0.098080 | 0.519471 |
| O | O31 | 0.906263 | 0.587520 | 0.287030 |
| O | O32 | 0.190715 | 0.522567 | 0.133669 |
| O | O33 | 0.702756 | 0.936803 | 0.500142 |
| O | O34 | 0.583966 | 0.703922 | 0.838489 |
| O | O35 | 0.097928 | 0.178841 | 0.623817 |
| O | O36 | 0.143235 | 0.520290 | 0.466875 |
| O | O37 | 0.370274 | 0.266390 | 0.831723 |
| O | O38 | 0.251848 | 0.036510 | 0.176405 |
| O | O39 | 0.759110 | 0.510690 | 0.953348 |
| O | O40 | 0.813187 | 0.848418 | 0.795132 |
| O | O41 | 0.036119 | 0.594611 | 0.167550 |
| O | O42 | 0.919349 | 0.358384 | 0.517888 |

|    |      |          |          |          |
|----|------|----------|----------|----------|
| 0  | 043  | 0.424931 | 0.845658 | 0.289583 |
| 0  | 044  | 0.481619 | 0.183324 | 0.130857 |
| 0  | 045  | 0.901798 | 0.706787 | 0.446649 |
| 0  | 046  | 0.694794 | 0.614959 | 0.085060 |
| 0  | 047  | 0.165393 | 0.580895 | 0.309692 |
| 0  | 048  | 0.503082 | 0.863008 | 0.467797 |
| 0  | 049  | 0.587888 | 0.058909 | 0.756109 |
| 0  | 050  | 0.362115 | 0.952067 | 0.422716 |
| 0  | 051  | 0.826944 | 0.914978 | 0.640457 |
| 0  | 052  | 0.170874 | 0.199228 | 0.802096 |
| 0  | 053  | 0.254062 | 0.389537 | 0.096870 |
| 0  | 054  | 0.024469 | 0.280464 | 0.752934 |
| 0  | 055  | 0.495994 | 0.247797 | 0.975109 |
| 0  | 056  | 0.838317 | 0.527763 | 0.132643 |
| 0  | 057  | 0.277953 | 0.716416 | 0.430094 |
| 0  | 058  | 0.389888 | 0.592909 | 0.089144 |
| 0  | 059  | 0.423003 | 0.101683 | 0.306956 |
| 0  | 060  | 0.126775 | 0.144472 | 0.466465 |
| 0  | 061  | 0.943484 | 0.047479 | 0.761607 |
| 0  | 062  | 0.064428 | 0.917367 | 0.416885 |
| 0  | 063  | 0.095192 | 0.438175 | 0.643265 |
| 0  | 064  | 0.801759 | 0.491548 | 0.795147 |
| 0  | 065  | 0.611757 | 0.381474 | 0.094675 |
| 0  | 066  | 0.721428 | 0.263103 | 0.750420 |
| 0  | 067  | 0.750930 | 0.768047 | 0.973180 |
| 0  | 068  | 0.468897 | 0.821600 | 0.133782 |
| 0  | 069  | 0.292416 | 0.087354 | 0.429251 |
| 0  | 070  | 0.407535 | 0.310250 | 0.090208 |
| 0  | 071  | 0.895318 | 0.815659 | 0.303721 |
| 0  | 072  | 0.852968 | 0.484531 | 0.457712 |
| 0  | 073  | 0.955322 | 0.415149 | 0.760055 |
| 0  | 074  | 0.075550 | 0.650115 | 0.418189 |
| 0  | 075  | 0.562754 | 0.177492 | 0.641942 |
| 0  | 076  | 0.509738 | 0.832113 | 0.803260 |
| 0  | 077  | 0.622658 | 0.746569 | 0.098745 |
| 0  | 078  | 0.738950 | 0.976055 | 0.757354 |
| 0  | 079  | 0.235514 | 0.505252 | 0.976916 |
| 0  | 080  | 0.177220 | 0.161816 | 0.133699 |
| Al | Al81 | 0.935119 | 0.609667 | 0.400670 |
| Al | Al82 | 0.601034 | 0.942380 | 0.735482 |
| Al | Al83 | 0.268848 | 0.275352 | 0.070144 |
| Al | Al84 | 0.391825 | 0.845091 | 0.402013 |
| Al | Al85 | 0.058984 | 0.175885 | 0.734806 |
| Al | Al86 | 0.727004 | 0.509307 | 0.067123 |

|    |      |          |          |          |
|----|------|----------|----------|----------|
| Al | Al87 | 0.156812 | 0.057034 | 0.401888 |
| Al | Al88 | 0.827299 | 0.400911 | 0.731614 |
| Al | Al89 | 0.494111 | 0.731488 | 0.070361 |
| Al | Al90 | 0.061929 | 0.402985 | 0.530989 |
| Al | Al91 | 0.721699 | 0.737049 | 0.861520 |
| Al | Al92 | 0.389435 | 0.068969 | 0.194849 |
| Al | Al93 | 0.596797 | 0.170000 | 0.530784 |
| Al | Al94 | 0.266104 | 0.503886 | 0.864493 |
| Al | Al95 | 0.933537 | 0.833200 | 0.194604 |
| Al | Al96 | 0.833644 | 0.955667 | 0.527769 |
| Al | Al97 | 0.497297 | 0.279214 | 0.862924 |
| Al | Al98 | 0.165371 | 0.612562 | 0.196996 |
| Si | Si99 | 0.932276 | 0.833135 | 0.406071 |
| P  | P100 | 0.061221 | 0.178068 | 0.527211 |
| P  | P101 | 0.724524 | 0.509511 | 0.856824 |
| P  | P102 | 0.391481 | 0.843034 | 0.192131 |
| P  | P103 | 0.830168 | 0.392517 | 0.523925 |
| P  | P104 | 0.492046 | 0.732448 | 0.858837 |
| P  | P105 | 0.158797 | 0.064381 | 0.193039 |
| P  | P106 | 0.599347 | 0.940455 | 0.528042 |
| P  | P107 | 0.270047 | 0.277431 | 0.859481 |
| P  | P108 | 0.937568 | 0.611250 | 0.188414 |
| P  | P109 | 0.599158 | 0.172053 | 0.737186 |
| P  | P110 | 0.267860 | 0.502812 | 0.073986 |
| P  | P111 | 0.165126 | 0.616967 | 0.405844 |
| P  | P112 | 0.830688 | 0.947323 | 0.738051 |
| P  | P113 | 0.498811 | 0.280675 | 0.072756 |
| P  | P114 | 0.390691 | 0.072806 | 0.404701 |
| P  | P115 | 0.056417 | 0.402651 | 0.739114 |
| P  | P116 | 0.723314 | 0.736369 | 0.071436 |

***TS-Methylation-ZCH3-Toluene-Si-ALPO-34***

```

data_
_audit_creation_method      'Materials Studio'
_cell_length_a              13.885913
_cell_length_b              13.885913
_cell_length_c              15.094859
_cell_angle_alpha           90.000000
_cell_angle_beta            90.000000
_cell_angle_gamma           120.000000
_symmetry_space_group_name_H-M  'P1'
loop_

```

| <u>_atom_site_type_symbol</u> |     | <u>_atom_site_label</u> | <u>_atom_site_fract_x</u> | <u>_atom_site_fract_y</u> | <u>_atom_site_fract_z</u> |
|-------------------------------|-----|-------------------------|---------------------------|---------------------------|---------------------------|
| H                             | H1  |                         | 0.702142                  | 0.595762                  | 0.442399                  |
| H                             | H2  |                         | 0.768377                  | 0.572118                  | 0.541338                  |
| H                             | H3  |                         | 0.767284                  | 0.705100                  | 0.529269                  |
| H                             | H4  |                         | 0.412452                  | 0.447900                  | 0.291301                  |
| H                             | H5  |                         | 0.327194                  | 0.495816                  | 0.337770                  |
| H                             | H6  |                         | 0.295311                  | 0.356388                  | 0.354899                  |
| H                             | H7  |                         | 0.548756                  | 0.377017                  | 0.579710                  |
| H                             | H8  |                         | 0.458138                  | 0.643477                  | 0.435285                  |
| H                             | H9  |                         | 0.424872                  | 0.318457                  | 0.449552                  |
| H                             | H10 |                         | 0.621778                  | 0.567396                  | 0.642767                  |
| H                             | H11 |                         | 0.579970                  | 0.702030                  | 0.566500                  |
| C                             | C12 |                         | 0.743500                  | 0.623200                  | 0.505472                  |
| C                             | C13 |                         | 0.530759                  | 0.435846                  | 0.546924                  |
| C                             | C14 |                         | 0.579122                  | 0.546199                  | 0.579312                  |
| C                             | C15 |                         | 0.547957                  | 0.619044                  | 0.539752                  |
| C                             | C16 |                         | 0.478886                  | 0.585639                  | 0.466016                  |
| C                             | C17 |                         | 0.434961                  | 0.477684                  | 0.431260                  |
| C                             | C18 |                         | 0.362918                  | 0.442569                  | 0.349797                  |
| C                             | C19 |                         | 0.460919                  | 0.402989                  | 0.473852                  |
| O                             | O20 |                         | 0.091769                  | 0.296902                  | 0.493631                  |
| O                             | O21 |                         | 0.304801                  | 0.401301                  | 0.835436                  |
| O                             | O22 |                         | 0.828587                  | 0.434328                  | 0.608958                  |
| O                             | O23 |                         | 0.493267                  | 0.156025                  | 0.453820                  |
| O                             | O24 |                         | 0.737688                  | 0.622611                  | 0.819991                  |
| O                             | O25 |                         | 0.973095                  | 0.733249                  | 0.159280                  |
| O                             | O26 |                         | 0.499430                  | 0.763332                  | 0.948442                  |
| O                             | O27 |                         | 0.153821                  | 0.480292                  | 0.794708                  |
| O                             | O28 |                         | 0.410347                  | 0.957536                  | 0.158866                  |
| O                             | O29 |                         | 0.624154                  | 0.059963                  | 0.510483                  |
| O                             | O30 |                         | 0.166576                  | 0.100110                  | 0.282232                  |
| O                             | O31 |                         | 0.829557                  | 0.818131                  | 0.114736                  |
| O                             | O32 |                         | 0.722797                  | 0.292312                  | 0.491010                  |
| O                             | O33 |                         | 0.606441                  | 0.419162                  | 0.832629                  |
| O                             | O34 |                         | 0.573563                  | 0.901184                  | 0.615893                  |
| O                             | O35 |                         | 0.860604                  | 0.866963                  | 0.458922                  |
| O                             | O36 |                         | 0.382855                  | 0.634471                  | 0.825909                  |
| O                             | O37 |                         | 0.276187                  | 0.753775                  | 0.168949                  |
| O                             | O38 |                         | 0.245593                  | 0.248731                  | 0.949041                  |
| O                             | O39 |                         | 0.527850                  | 0.191124                  | 0.791572                  |

|   |     |          |          |          |
|---|-----|----------|----------|----------|
| 0 | 040 | 0.052357 | 0.966053 | 0.160783 |
| 0 | 041 | 0.941296 | 0.098425 | 0.508512 |
| 0 | 042 | 0.909760 | 0.584092 | 0.277240 |
| 0 | 043 | 0.195966 | 0.524515 | 0.125266 |
| 0 | 044 | 0.708237 | 0.940207 | 0.490926 |
| 0 | 045 | 0.587100 | 0.705973 | 0.828070 |
| 0 | 046 | 0.101677 | 0.178679 | 0.615655 |
| 0 | 047 | 0.148199 | 0.520700 | 0.456684 |
| 0 | 048 | 0.373608 | 0.266810 | 0.823843 |
| 0 | 049 | 0.256600 | 0.037443 | 0.168085 |
| 0 | 050 | 0.762487 | 0.513418 | 0.943243 |
| 0 | 051 | 0.817244 | 0.851641 | 0.787331 |
| 0 | 052 | 0.042580 | 0.598700 | 0.157736 |
| 0 | 053 | 0.925223 | 0.360198 | 0.511923 |
| 0 | 054 | 0.430020 | 0.845481 | 0.281419 |
| 0 | 055 | 0.486630 | 0.185244 | 0.122350 |
| 0 | 056 | 0.902824 | 0.704923 | 0.432950 |
| 0 | 057 | 0.698898 | 0.616132 | 0.077414 |
| 0 | 058 | 0.172276 | 0.583679 | 0.300280 |
| 0 | 059 | 0.507498 | 0.861937 | 0.459517 |
| 0 | 060 | 0.590168 | 0.060181 | 0.745286 |
| 0 | 061 | 0.368759 | 0.954097 | 0.413932 |
| 0 | 062 | 0.830176 | 0.919546 | 0.633042 |
| 0 | 063 | 0.174377 | 0.201020 | 0.794719 |
| 0 | 064 | 0.261392 | 0.392442 | 0.091595 |
| 0 | 065 | 0.029212 | 0.283139 | 0.742920 |
| 0 | 066 | 0.500894 | 0.249626 | 0.966362 |
| 0 | 067 | 0.845296 | 0.531814 | 0.121193 |
| 0 | 068 | 0.282657 | 0.717555 | 0.421956 |
| 0 | 069 | 0.395564 | 0.595965 | 0.081825 |
| 0 | 070 | 0.427052 | 0.104601 | 0.298960 |
| 0 | 071 | 0.134842 | 0.147869 | 0.458255 |
| 0 | 072 | 0.947040 | 0.050760 | 0.754537 |
| 0 | 073 | 0.064873 | 0.917428 | 0.408044 |
| 0 | 074 | 0.103997 | 0.442586 | 0.634831 |
| 0 | 075 | 0.805363 | 0.492223 | 0.785986 |
| 0 | 076 | 0.617903 | 0.383097 | 0.085798 |
| 0 | 077 | 0.726324 | 0.263996 | 0.742255 |
| 0 | 078 | 0.752289 | 0.766106 | 0.962899 |
| 0 | 079 | 0.475719 | 0.824886 | 0.125310 |
| 0 | 080 | 0.295214 | 0.086071 | 0.421619 |
| 0 | 081 | 0.413707 | 0.313026 | 0.081969 |
| 0 | 082 | 0.895269 | 0.820868 | 0.295013 |
| 0 | 083 | 0.858261 | 0.484448 | 0.448397 |

|    |       |          |          |          |
|----|-------|----------|----------|----------|
| O  | O84   | 0.960384 | 0.418184 | 0.748596 |
| O  | O85   | 0.079957 | 0.650730 | 0.408492 |
| O  | O86   | 0.568993 | 0.182519 | 0.632478 |
| O  | O87   | 0.512501 | 0.834367 | 0.794950 |
| O  | O88   | 0.628404 | 0.749036 | 0.090518 |
| O  | O89   | 0.742388 | 0.979053 | 0.750886 |
| O  | O90   | 0.241660 | 0.504960 | 0.969269 |
| O  | O91   | 0.183558 | 0.164178 | 0.125955 |
| Al | Al92  | 0.938830 | 0.609744 | 0.390978 |
| Al | Al93  | 0.604647 | 0.944040 | 0.727137 |
| Al | Al94  | 0.274782 | 0.277964 | 0.062291 |
| Al | Al95  | 0.396825 | 0.846144 | 0.393639 |
| Al | Al96  | 0.063184 | 0.177908 | 0.726657 |
| Al | Al97  | 0.732246 | 0.511612 | 0.057125 |
| Al | Al98  | 0.159448 | 0.056152 | 0.393735 |
| Al | Al99  | 0.831088 | 0.402341 | 0.722194 |
| Al | Al100 | 0.500139 | 0.734227 | 0.061662 |
| Al | Al101 | 0.068036 | 0.405102 | 0.523152 |
| Al | Al102 | 0.724457 | 0.737339 | 0.850511 |
| Al | Al103 | 0.394557 | 0.071136 | 0.186604 |
| Al | Al104 | 0.601471 | 0.171682 | 0.521582 |
| Al | Al105 | 0.270600 | 0.505416 | 0.856172 |
| Al | Al106 | 0.936942 | 0.835833 | 0.186788 |
| Al | Al107 | 0.838331 | 0.956755 | 0.519755 |
| Al | Al108 | 0.501612 | 0.281203 | 0.854009 |
| Al | Al109 | 0.171009 | 0.615486 | 0.187619 |
| Si | Si110 | 0.932432 | 0.831327 | 0.397542 |
| P  | P111  | 0.066994 | 0.179293 | 0.518686 |
| P  | P112  | 0.728001 | 0.511556 | 0.846386 |
| P  | P113  | 0.397723 | 0.845163 | 0.183824 |
| P  | P114  | 0.834773 | 0.392944 | 0.515042 |
| P  | P115  | 0.495738 | 0.734511 | 0.849917 |
| P  | P116  | 0.164156 | 0.066190 | 0.185087 |
| P  | P117  | 0.603718 | 0.941298 | 0.519410 |
| P  | P118  | 0.274392 | 0.279663 | 0.851182 |
| P  | P119  | 0.942789 | 0.613166 | 0.179465 |
| P  | P120  | 0.603727 | 0.174514 | 0.727900 |
| P  | P121  | 0.273955 | 0.504776 | 0.066586 |
| P  | P122  | 0.169849 | 0.618255 | 0.396636 |
| P  | P123  | 0.834269 | 0.950621 | 0.730865 |
| P  | P124  | 0.504528 | 0.282771 | 0.064007 |
| P  | P125  | 0.394936 | 0.074110 | 0.396518 |
| P  | P126  | 0.061906 | 0.405647 | 0.729984 |
| P  | P127  | 0.727923 | 0.737440 | 0.061702 |



### ***TS-Methylation-ZCH3-TMB-Si-AIPO-34***

```
data_
_audit_creation_method      'Materials Studio'
_cell_length_a              13.885913
_cell_length_b              13.885913
_cell_length_c              15.094859
_cell_angle_alpha           90.000000
_cell_angle_beta            90.000000
_cell_angle_gamma           120.000000
_symmetry_space_group_name_H-M  'P1'
loop_
_atom_site_type_symbol
_atom_site_label
_atom_site_fract_x
_atom_site_fract_y
_atom_site_fract_z
  H      H1          0.704043      0.633996      0.430170
  H      H2          0.746950      0.551576      0.501309
  H      H3          0.750333      0.677634      0.546393
  H      H4          0.404309      0.337667      0.279174
  H      H5          0.526042      0.335471      0.310986
  H      H6          0.535371      0.445304      0.245131
  H      H7          0.628927      0.524609      0.669701
  H      H8          0.609026      0.402859      0.615531
  H      H9          0.494863      0.407119      0.662692
  H      H10         0.482934      0.690439      0.610880
  H      H11         0.601077      0.685506      0.648887
  H      H12         0.467441      0.576185      0.674331
  H      H13         0.482087      0.580473      0.244205
  H      H14         0.407360      0.628338      0.308234
  H      H15         0.345496      0.486195      0.278030
  H      H16         0.561521      0.370778      0.462405
  H      H17         0.449778      0.656322      0.459123
  C      C18         0.732179      0.619648      0.492686
  C      C19         0.490970      0.389427      0.300308
  C      C20         0.537591      0.434083      0.461272
  C      C21         0.551012      0.495692      0.539933
  C      C22         0.573249      0.456082      0.626611
  C      C23         0.515697      0.576116      0.539011
  C      C24         0.516709      0.635584      0.622300
  C      C25         0.475867      0.594748      0.459911
```

|   |     |          |          |          |
|---|-----|----------|----------|----------|
| C | C26 | 0.466741 | 0.535956 | 0.382030 |
| C | C27 | 0.423143 | 0.559626 | 0.298887 |
| C | C28 | 0.498496 | 0.453676 | 0.382643 |
| O | O29 | 0.086820 | 0.296314 | 0.500847 |
| O | O30 | 0.302776 | 0.404730 | 0.842601 |
| O | O31 | 0.834048 | 0.440082 | 0.617474 |
| O | O32 | 0.492179 | 0.155595 | 0.461008 |
| O | O33 | 0.736086 | 0.624591 | 0.829784 |
| O | O34 | 0.968849 | 0.734669 | 0.166636 |
| O | O35 | 0.501001 | 0.775728 | 0.956516 |
| O | O36 | 0.154163 | 0.485067 | 0.798855 |
| O | O37 | 0.407986 | 0.959059 | 0.164733 |
| O | O38 | 0.633034 | 0.066833 | 0.507748 |
| O | O39 | 0.165716 | 0.102648 | 0.289516 |
| O | O40 | 0.823802 | 0.818676 | 0.126243 |
| O | O41 | 0.718221 | 0.298922 | 0.502254 |
| O | O42 | 0.606824 | 0.421720 | 0.849874 |
| O | O43 | 0.571967 | 0.917653 | 0.624261 |
| O | O44 | 0.861998 | 0.870425 | 0.468189 |
| O | O45 | 0.380643 | 0.637757 | 0.839858 |
| O | O46 | 0.273706 | 0.755666 | 0.178269 |
| O | O47 | 0.240262 | 0.250802 | 0.955560 |
| O | O48 | 0.525347 | 0.197179 | 0.794589 |
| O | O49 | 0.049074 | 0.968420 | 0.168758 |
| O | O50 | 0.935232 | 0.098809 | 0.519185 |
| O | O51 | 0.912690 | 0.589068 | 0.286840 |
| O | O52 | 0.194780 | 0.526965 | 0.133900 |
| O | O53 | 0.702851 | 0.933562 | 0.502301 |
| O | O54 | 0.584336 | 0.706707 | 0.841609 |
| O | O55 | 0.098453 | 0.179672 | 0.623250 |
| O | O56 | 0.145188 | 0.520959 | 0.464198 |
| O | O57 | 0.374024 | 0.272507 | 0.833645 |
| O | O58 | 0.253166 | 0.037777 | 0.174942 |
| O | O59 | 0.769074 | 0.521881 | 0.953576 |
| O | O60 | 0.814522 | 0.854375 | 0.799031 |
| O | O61 | 0.040355 | 0.601671 | 0.163589 |
| O | O62 | 0.920282 | 0.358523 | 0.516464 |
| O | O63 | 0.427254 | 0.850798 | 0.290644 |
| O | O64 | 0.483551 | 0.188259 | 0.132876 |
| O | O65 | 0.901956 | 0.708162 | 0.441880 |
| O | O66 | 0.695330 | 0.615950 | 0.088625 |
| O | O67 | 0.166174 | 0.585218 | 0.308263 |
| O | O68 | 0.504309 | 0.866079 | 0.469273 |
| O | O69 | 0.590833 | 0.064235 | 0.764575 |

|    |       |          |          |          |
|----|-------|----------|----------|----------|
| O  | 070   | 0.361701 | 0.953748 | 0.424768 |
| O  | 071   | 0.829545 | 0.919445 | 0.643644 |
| O  | 072   | 0.175442 | 0.204292 | 0.799874 |
| O  | 073   | 0.260645 | 0.395401 | 0.098633 |
| O  | 074   | 0.029098 | 0.285706 | 0.751899 |
| O  | 075   | 0.496472 | 0.242139 | 0.973849 |
| O  | 076   | 0.840705 | 0.531464 | 0.133519 |
| O  | 077   | 0.282204 | 0.717174 | 0.429408 |
| O  | 078   | 0.390984 | 0.598734 | 0.080532 |
| O  | 079   | 0.422381 | 0.101456 | 0.307284 |
| O  | 080   | 0.127076 | 0.145575 | 0.465693 |
| O  | 081   | 0.946016 | 0.052769 | 0.764238 |
| O  | 082   | 0.065481 | 0.919119 | 0.414100 |
| O  | 083   | 0.096636 | 0.442114 | 0.641297 |
| O  | 084   | 0.802972 | 0.493607 | 0.795419 |
| O  | 085   | 0.615419 | 0.382977 | 0.088683 |
| O  | 086   | 0.723823 | 0.267385 | 0.747090 |
| O  | 087   | 0.750954 | 0.766020 | 0.973640 |
| O  | 088   | 0.473237 | 0.825017 | 0.136273 |
| O  | 089   | 0.294259 | 0.090864 | 0.430326 |
| O  | 090   | 0.411548 | 0.314227 | 0.084198 |
| O  | 091   | 0.892993 | 0.822826 | 0.304011 |
| O  | 092   | 0.857917 | 0.487547 | 0.456247 |
| O  | 093   | 0.957816 | 0.418564 | 0.759571 |
| O  | 094   | 0.080407 | 0.654996 | 0.420168 |
| O  | 095   | 0.565540 | 0.169976 | 0.639454 |
| O  | 096   | 0.511172 | 0.833776 | 0.799054 |
| O  | 097   | 0.622767 | 0.747143 | 0.098640 |
| O  | 098   | 0.741579 | 0.982151 | 0.758746 |
| O  | 099   | 0.229213 | 0.500133 | 0.976193 |
| O  | 0100  | 0.182303 | 0.166344 | 0.133177 |
| Al | Al101 | 0.939972 | 0.614201 | 0.400675 |
| Al | Al102 | 0.604240 | 0.949424 | 0.736809 |
| Al | Al103 | 0.272097 | 0.279788 | 0.068444 |
| Al | Al104 | 0.393384 | 0.848612 | 0.403074 |
| Al | Al105 | 0.061627 | 0.179633 | 0.734444 |
| Al | Al106 | 0.730927 | 0.513239 | 0.066127 |
| Al | Al107 | 0.158086 | 0.058853 | 0.401287 |
| Al | Al108 | 0.830329 | 0.405613 | 0.730688 |
| Al | Al109 | 0.497250 | 0.737810 | 0.068137 |
| Al | Al110 | 0.063327 | 0.404556 | 0.529442 |
| Al | Al111 | 0.722460 | 0.738789 | 0.861244 |
| Al | Al112 | 0.390936 | 0.071408 | 0.194508 |
| Al | Al113 | 0.601409 | 0.171503 | 0.527804 |

|    |       |          |          |          |
|----|-------|----------|----------|----------|
| Al | Al114 | 0.266791 | 0.507412 | 0.864356 |
| Al | Al115 | 0.933975 | 0.837920 | 0.195662 |
| Al | Al116 | 0.835316 | 0.955745 | 0.530326 |
| Al | Al117 | 0.500433 | 0.282904 | 0.863288 |
| Al | Al118 | 0.167851 | 0.617323 | 0.195459 |
| Si | Si119 | 0.932506 | 0.834569 | 0.406092 |
| P  | P120  | 0.061498 | 0.178855 | 0.526732 |
| P  | P121  | 0.728781 | 0.515033 | 0.857809 |
| P  | P122  | 0.395135 | 0.847427 | 0.192701 |
| P  | P123  | 0.833803 | 0.396208 | 0.523390 |
| P  | P124  | 0.494625 | 0.738551 | 0.859791 |
| P  | P125  | 0.161771 | 0.067969 | 0.192475 |
| P  | P126  | 0.603585 | 0.946346 | 0.526235 |
| P  | P127  | 0.272861 | 0.283155 | 0.858397 |
| P  | P128  | 0.940860 | 0.615555 | 0.188205 |
| P  | P129  | 0.601868 | 0.174935 | 0.736322 |
| P  | P130  | 0.269069 | 0.505667 | 0.072011 |
| P  | P131  | 0.167732 | 0.619595 | 0.405223 |
| P  | P132  | 0.833044 | 0.952534 | 0.740784 |
| P  | P133  | 0.501458 | 0.281833 | 0.069772 |
| P  | P134  | 0.391344 | 0.074547 | 0.405464 |
| P  | P135  | 0.059312 | 0.407279 | 0.737547 |
| P  | P136  | 0.723913 | 0.737120 | 0.072024 |

***TS-Ethylation-C3-C2H5Z-Si-AIPO-34***

|                                |                    |          |          |          |
|--------------------------------|--------------------|----------|----------|----------|
| data_                          |                    |          |          |          |
| _audit_creation_method         | 'Materials Studio' |          |          |          |
| _cell_length_a                 | 13.885913          |          |          |          |
| _cell_length_b                 | 13.885913          |          |          |          |
| _cell_length_c                 | 15.094859          |          |          |          |
| _cell_angle_alpha              | 90.000000          |          |          |          |
| _cell_angle_beta               | 90.000000          |          |          |          |
| _cell_angle_gamma              | 120.000000         |          |          |          |
| _symmetry_space_group_name_H-M | 'P1'               |          |          |          |
| loop_                          |                    |          |          |          |
| _atom_site_type_symbol         |                    |          |          |          |
| _atom_site_label               |                    |          |          |          |
| _atom_site_fract_x             |                    |          |          |          |
| _atom_site_fract_y             |                    |          |          |          |
| _atom_site_fract_z             |                    |          |          |          |
| H                              | H1                 | 0.709977 | 0.676635 | 0.475149 |
| H                              | H2                 | 0.705368 | 0.540909 | 0.478827 |

|   |     |          |          |          |
|---|-----|----------|----------|----------|
| H | H3  | 0.394682 | 0.545437 | 0.383654 |
| H | H4  | 0.533105 | 0.602289 | 0.348672 |
| H | H5  | 0.500993 | 0.664100 | 0.439333 |
| H | H6  | 0.740278 | 0.696473 | 0.637346 |
| H | H7  | 0.847526 | 0.672091 | 0.604469 |
| H | H8  | 0.723689 | 0.559368 | 0.643437 |
| H | H9  | 0.520092 | 0.465434 | 0.598555 |
| H | H10 | 0.529290 | 0.602781 | 0.588424 |
| H | H11 | 0.478598 | 0.429926 | 0.441463 |
| C | C12 | 0.756790 | 0.636006 | 0.605329 |
| C | C13 | 0.719678 | 0.615675 | 0.512272 |
| C | C14 | 0.519589 | 0.528379 | 0.556284 |
| C | C15 | 0.492964 | 0.508515 | 0.469361 |
| C | C16 | 0.480869 | 0.585529 | 0.407692 |
| O | O17 | 0.082957 | 0.291975 | 0.509538 |
| O | O18 | 0.296450 | 0.396096 | 0.850549 |
| O | O19 | 0.823315 | 0.427046 | 0.624856 |
| O | O20 | 0.485180 | 0.152691 | 0.468377 |
| O | O21 | 0.731270 | 0.618053 | 0.836926 |
| O | O22 | 0.963864 | 0.727579 | 0.175634 |
| O | O23 | 0.492044 | 0.757560 | 0.962954 |
| O | O24 | 0.146478 | 0.475054 | 0.807843 |
| O | O25 | 0.403047 | 0.952898 | 0.174024 |
| O | O26 | 0.614575 | 0.054513 | 0.525165 |
| O | O27 | 0.157455 | 0.093725 | 0.295728 |
| O | O28 | 0.821655 | 0.813325 | 0.128336 |
| O | O29 | 0.713976 | 0.287387 | 0.506413 |
| O | O30 | 0.598276 | 0.414519 | 0.846942 |
| O | O31 | 0.565668 | 0.896294 | 0.630838 |
| O | O32 | 0.850368 | 0.860621 | 0.473255 |
| O | O33 | 0.374493 | 0.629080 | 0.840440 |
| O | O34 | 0.268272 | 0.749166 | 0.183927 |
| O | O35 | 0.236752 | 0.242537 | 0.963206 |
| O | O36 | 0.518772 | 0.185339 | 0.806790 |
| O | O37 | 0.045096 | 0.960287 | 0.173271 |
| O | O38 | 0.932419 | 0.093294 | 0.521096 |
| O | O39 | 0.901370 | 0.576271 | 0.291755 |
| O | O40 | 0.187969 | 0.519795 | 0.140023 |
| O | O41 | 0.699203 | 0.935072 | 0.505046 |
| O | O42 | 0.578431 | 0.699604 | 0.841915 |
| O | O43 | 0.091308 | 0.170800 | 0.629711 |
| O | O44 | 0.143408 | 0.516559 | 0.471572 |
| O | O45 | 0.365739 | 0.262157 | 0.838355 |
| O | O46 | 0.249304 | 0.032927 | 0.181818 |

|    |      |          |          |          |
|----|------|----------|----------|----------|
| 0  | 047  | 0.754476 | 0.505382 | 0.957876 |
| 0  | 048  | 0.808123 | 0.845382 | 0.800213 |
| 0  | 049  | 0.034811 | 0.594347 | 0.171606 |
| 0  | 050  | 0.917743 | 0.358022 | 0.520462 |
| 0  | 051  | 0.422612 | 0.840175 | 0.296105 |
| 0  | 052  | 0.479003 | 0.180554 | 0.136639 |
| 0  | 053  | 0.893738 | 0.700796 | 0.443774 |
| 0  | 054  | 0.691726 | 0.611665 | 0.089757 |
| 0  | 055  | 0.162993 | 0.579102 | 0.315078 |
| 0  | 056  | 0.498237 | 0.856105 | 0.474805 |
| 0  | 057  | 0.580561 | 0.053931 | 0.760782 |
| 0  | 058  | 0.362337 | 0.950832 | 0.427932 |
| 0  | 059  | 0.823209 | 0.917676 | 0.647400 |
| 0  | 060  | 0.166791 | 0.196112 | 0.808395 |
| 0  | 061  | 0.252216 | 0.387026 | 0.104794 |
| 0  | 062  | 0.021562 | 0.277706 | 0.756539 |
| 0  | 063  | 0.493840 | 0.245743 | 0.980978 |
| 0  | 064  | 0.837202 | 0.526647 | 0.135565 |
| 0  | 065  | 0.272899 | 0.714395 | 0.436185 |
| 0  | 066  | 0.387138 | 0.590468 | 0.095965 |
| 0  | 067  | 0.419621 | 0.101297 | 0.313256 |
| 0  | 068  | 0.126554 | 0.143809 | 0.472005 |
| 0  | 069  | 0.938868 | 0.045487 | 0.770815 |
| 0  | 070  | 0.055965 | 0.913785 | 0.422935 |
| 0  | 071  | 0.090917 | 0.437407 | 0.649030 |
| 0  | 072  | 0.796762 | 0.486790 | 0.799846 |
| 0  | 073  | 0.609295 | 0.378856 | 0.101194 |
| 0  | 074  | 0.717161 | 0.257511 | 0.758143 |
| 0  | 075  | 0.743037 | 0.763324 | 0.977016 |
| 0  | 076  | 0.467434 | 0.819577 | 0.139675 |
| 0  | 077  | 0.286620 | 0.080831 | 0.435622 |
| 0  | 078  | 0.405024 | 0.307631 | 0.096174 |
| 0  | 079  | 0.886777 | 0.820153 | 0.308539 |
| 0  | 080  | 0.845108 | 0.481360 | 0.465278 |
| 0  | 081  | 0.951177 | 0.411028 | 0.767040 |
| 0  | 082  | 0.069093 | 0.642072 | 0.425294 |
| 0  | 083  | 0.560292 | 0.176567 | 0.647810 |
| 0  | 084  | 0.504435 | 0.828750 | 0.809685 |
| 0  | 085  | 0.619831 | 0.743012 | 0.106093 |
| 0  | 086  | 0.734208 | 0.974302 | 0.766300 |
| 0  | 087  | 0.232734 | 0.500800 | 0.983588 |
| 0  | 088  | 0.175084 | 0.158805 | 0.139793 |
| Al | Al89 | 0.929358 | 0.604289 | 0.405411 |
| Al | Al90 | 0.596321 | 0.938713 | 0.742076 |

|    |       |          |          |          |
|----|-------|----------|----------|----------|
| Al | Al91  | 0.266195 | 0.272670 | 0.076392 |
| Al | Al92  | 0.388671 | 0.841697 | 0.408136 |
| Al | Al93  | 0.054845 | 0.172005 | 0.740906 |
| Al | Al94  | 0.724268 | 0.506245 | 0.071414 |
| Al | Al95  | 0.151476 | 0.052279 | 0.407695 |
| Al | Al96  | 0.822647 | 0.395309 | 0.738217 |
| Al | Al97  | 0.491913 | 0.728743 | 0.076301 |
| Al | Al98  | 0.059282 | 0.400652 | 0.536731 |
| Al | Al99  | 0.716008 | 0.732207 | 0.864899 |
| Al | Al100 | 0.387065 | 0.066643 | 0.201112 |
| Al | Al101 | 0.592336 | 0.166723 | 0.536678 |
| Al | Al102 | 0.262121 | 0.500180 | 0.870719 |
| Al | Al103 | 0.928870 | 0.831561 | 0.200706 |
| Al | Al104 | 0.829491 | 0.951831 | 0.533589 |
| Al | Al105 | 0.493601 | 0.276470 | 0.868645 |
| Al | Al106 | 0.162936 | 0.610801 | 0.202310 |
| Si | Si107 | 0.923888 | 0.827697 | 0.410921 |
| P  | P108  | 0.057988 | 0.173879 | 0.532668 |
| P  | P109  | 0.720114 | 0.505892 | 0.861360 |
| P  | P110  | 0.389988 | 0.840248 | 0.198629 |
| P  | P111  | 0.826072 | 0.388505 | 0.529380 |
| P  | P112  | 0.487606 | 0.728746 | 0.864373 |
| P  | P113  | 0.156189 | 0.060763 | 0.198596 |
| P  | P114  | 0.594766 | 0.936014 | 0.534228 |
| P  | P115  | 0.266149 | 0.274368 | 0.865596 |
| P  | P116  | 0.934452 | 0.607464 | 0.194230 |
| P  | P117  | 0.594524 | 0.168395 | 0.743251 |
| P  | P118  | 0.265291 | 0.499776 | 0.080762 |
| P  | P119  | 0.161321 | 0.613113 | 0.411691 |
| P  | P120  | 0.826153 | 0.946227 | 0.745627 |
| P  | P121  | 0.496445 | 0.278167 | 0.078667 |
| P  | P122  | 0.387266 | 0.070555 | 0.410791 |
| P  | P123  | 0.052685 | 0.399861 | 0.744760 |
| P  | P124  | 0.719729 | 0.732898 | 0.075606 |

***TS-Ethylation-C4-iso-C2H5Z-Si-ALPO-34***

```

data_
_audit_creation_method    'Materials Studio'
_cell_length_a            13.885913
_cell_length_b            13.885913
_cell_length_c            15.094859
_cell_angle_alpha        90.000000

```

```

_cell_angle_beta      90.000000
_cell_angle_gamma    120.000000
_symmetry_space_group_name_H-M  'P1'
loop_
_atom_site_type_symbol
_atom_site_label
_atom_site_fract_x
_atom_site_fract_y
_atom_site_fract_z
  H      H1      0.711877      0.676267      0.474027
  H      H2      0.707601      0.540914      0.478354
  H      H3      0.391424      0.556170      0.391414
  H      H4      0.526186      0.604199      0.350059
  H      H5      0.506597      0.668869      0.444992
  H      H6      0.465122      0.340438      0.472638
  H      H7      0.500464      0.405650      0.366584
  H      H8      0.365787      0.354916      0.408946
  H      H9      0.749194      0.701473      0.634512
  H      H10     0.852598      0.669467      0.605266
  H      H11     0.724681      0.561847      0.642635
  H      H12     0.523571      0.466892      0.596670
  H      H13     0.539172      0.606832      0.585511
  C      C14     0.762801      0.638324      0.603929
  C      C15     0.725681      0.617605      0.510571
  C      C16     0.523565      0.529964      0.554146
  C      C17     0.487455      0.506419      0.468946
  C      C18     0.478444      0.589639      0.411485
  C      C19     0.453870      0.395730      0.427935
  O      O20     0.084131      0.292084      0.509401
  O      O21     0.296514      0.395784      0.851162
  O      O22     0.823496      0.426384      0.624682
  O      O23     0.484381      0.150402      0.468948
  O      O24     0.731215      0.617764      0.836924
  O      O25     0.963857      0.727622      0.175237
  O      O26     0.491646      0.757228      0.962753
  O      O27     0.146523      0.474599      0.807618
  O      O28     0.403100      0.952855      0.174786
  O      O29     0.615664      0.054839      0.525958
  O      O30     0.157534      0.093273      0.296257
  O      O31     0.821668      0.813434      0.128010
  O      O32     0.713281      0.287411      0.506049
  O      O33     0.598083      0.414229      0.846938
  O      O34     0.565984      0.895859      0.630846
  O      O35     0.851048      0.861483      0.472962

```



|   |     |          |          |          |
|---|-----|----------|----------|----------|
| 0 | 036 | 0.374339 | 0.628795 | 0.840189 |
| 0 | 037 | 0.268076 | 0.749124 | 0.183858 |
| 0 | 038 | 0.236507 | 0.241842 | 0.963498 |
| 0 | 039 | 0.518873 | 0.185073 | 0.807135 |
| 0 | 040 | 0.045010 | 0.960383 | 0.173563 |
| 0 | 041 | 0.932609 | 0.093701 | 0.520802 |
| 0 | 042 | 0.901374 | 0.576623 | 0.291607 |
| 0 | 043 | 0.187894 | 0.519777 | 0.139978 |
| 0 | 044 | 0.699177 | 0.934752 | 0.504698 |
| 0 | 045 | 0.578304 | 0.699423 | 0.841855 |
| 0 | 046 | 0.091143 | 0.170346 | 0.629794 |
| 0 | 047 | 0.141421 | 0.515949 | 0.471319 |
| 0 | 048 | 0.365470 | 0.261564 | 0.838602 |
| 0 | 049 | 0.249247 | 0.032901 | 0.181879 |
| 0 | 050 | 0.754265 | 0.504924 | 0.957805 |
| 0 | 051 | 0.807987 | 0.844991 | 0.799693 |
| 0 | 052 | 0.034554 | 0.594210 | 0.171332 |
| 0 | 053 | 0.916690 | 0.355583 | 0.520716 |
| 0 | 054 | 0.422655 | 0.838969 | 0.295939 |
| 0 | 055 | 0.479007 | 0.180584 | 0.136937 |
| 0 | 056 | 0.891663 | 0.699482 | 0.443839 |
| 0 | 057 | 0.691707 | 0.611800 | 0.089360 |
| 0 | 058 | 0.162146 | 0.578910 | 0.314939 |
| 0 | 059 | 0.498291 | 0.856785 | 0.474908 |
| 0 | 060 | 0.580384 | 0.053635 | 0.760522 |
| 0 | 061 | 0.361061 | 0.949236 | 0.426695 |
| 0 | 062 | 0.823618 | 0.918491 | 0.647235 |
| 0 | 063 | 0.166657 | 0.196006 | 0.808598 |
| 0 | 064 | 0.252007 | 0.386949 | 0.104669 |
| 0 | 065 | 0.021257 | 0.277329 | 0.756376 |
| 0 | 066 | 0.493737 | 0.245845 | 0.981264 |
| 0 | 067 | 0.836894 | 0.526599 | 0.135556 |
| 0 | 068 | 0.272845 | 0.713419 | 0.436241 |
| 0 | 069 | 0.387082 | 0.590369 | 0.095967 |
| 0 | 070 | 0.419278 | 0.101694 | 0.313566 |
| 0 | 071 | 0.126587 | 0.142953 | 0.472230 |
| 0 | 072 | 0.938858 | 0.045299 | 0.771167 |
| 0 | 073 | 0.055697 | 0.912140 | 0.422682 |
| 0 | 074 | 0.090500 | 0.436963 | 0.648853 |
| 0 | 075 | 0.796568 | 0.486405 | 0.799764 |
| 0 | 076 | 0.609084 | 0.378992 | 0.101539 |
| 0 | 077 | 0.717198 | 0.257195 | 0.758244 |
| 0 | 078 | 0.743192 | 0.763503 | 0.976620 |
| 0 | 079 | 0.467147 | 0.819590 | 0.139160 |

|    |       |          |          |          |
|----|-------|----------|----------|----------|
| O  | O80   | 0.286119 | 0.079655 | 0.436229 |
| O  | O81   | 0.404799 | 0.307485 | 0.096613 |
| O  | O82   | 0.886458 | 0.819411 | 0.308309 |
| O  | O83   | 0.846557 | 0.480760 | 0.465032 |
| O  | O84   | 0.951183 | 0.410904 | 0.767140 |
| O  | O85   | 0.069448 | 0.643499 | 0.424946 |
| O  | O86   | 0.560270 | 0.176794 | 0.647994 |
| O  | O87   | 0.504251 | 0.828533 | 0.809569 |
| O  | O88   | 0.619890 | 0.743223 | 0.105665 |
| O  | O89   | 0.734202 | 0.974184 | 0.766471 |
| O  | O90   | 0.232692 | 0.500930 | 0.983521 |
| O  | O91   | 0.175081 | 0.159070 | 0.140562 |
| Al | Al92  | 0.929205 | 0.603935 | 0.405270 |
| Al | Al93  | 0.596310 | 0.938450 | 0.742055 |
| Al | Al94  | 0.265998 | 0.272523 | 0.076615 |
| Al | Al95  | 0.388517 | 0.840685 | 0.407888 |
| Al | Al96  | 0.054745 | 0.171752 | 0.741040 |
| Al | Al97  | 0.724051 | 0.506210 | 0.071258 |
| Al | Al98  | 0.151021 | 0.050904 | 0.408028 |
| Al | Al99  | 0.822595 | 0.395023 | 0.738173 |
| Al | Al100 | 0.491784 | 0.728637 | 0.076072 |
| Al | Al101 | 0.058746 | 0.399781 | 0.536648 |
| Al | Al102 | 0.715883 | 0.731951 | 0.864511 |
| Al | Al103 | 0.387016 | 0.066636 | 0.201387 |
| Al | Al104 | 0.592378 | 0.166322 | 0.537007 |
| Al | Al105 | 0.262121 | 0.499947 | 0.870658 |
| Al | Al106 | 0.928712 | 0.831438 | 0.200423 |
| Al | Al107 | 0.829607 | 0.952192 | 0.533440 |
| Al | Al108 | 0.493509 | 0.276243 | 0.868795 |
| Al | Al109 | 0.162703 | 0.610744 | 0.202132 |
| Si | Si110 | 0.923355 | 0.827294 | 0.410691 |
| P  | P111  | 0.058236 | 0.173664 | 0.532685 |
| P  | P112  | 0.719943 | 0.505560 | 0.861258 |
| P  | P113  | 0.389907 | 0.839930 | 0.198625 |
| P  | P114  | 0.826010 | 0.387565 | 0.529294 |
| P  | P115  | 0.487407 | 0.728468 | 0.864176 |
| P  | P116  | 0.156176 | 0.060717 | 0.198955 |
| P  | P117  | 0.595040 | 0.935980 | 0.534358 |
| P  | P118  | 0.266022 | 0.273977 | 0.865912 |
| P  | P119  | 0.934326 | 0.607505 | 0.193987 |
| P  | P120  | 0.594505 | 0.168233 | 0.743377 |
| P  | P121  | 0.265218 | 0.499777 | 0.080682 |
| P  | P122  | 0.160721 | 0.613029 | 0.411551 |
| P  | P123  | 0.826177 | 0.946217 | 0.745603 |

|   |      |          |          |          |
|---|------|----------|----------|----------|
| P | P124 | 0.496314 | 0.278183 | 0.078959 |
| P | P125 | 0.386596 | 0.069286 | 0.410857 |
| P | P126 | 0.052528 | 0.399538 | 0.744658 |
| P | P127 | 0.719752 | 0.733052 | 0.075184 |

***TS-Ethylation-TME-C2H5Z-Si-ALPO-34***

data\_

\_audit\_creation\_method 'Materials Studio'

\_cell\_length\_a 13.885913

\_cell\_length\_b 13.885913

\_cell\_length\_c 15.094859

\_cell\_angle\_alpha 90.000000

\_cell\_angle\_beta 90.000000

\_cell\_angle\_gamma 120.000000

\_symmetry\_space\_group\_name\_H-M 'P1'

loop\_

\_atom\_site\_type\_symbol

\_atom\_site\_label

\_atom\_site\_fract\_x

\_atom\_site\_fract\_y

\_atom\_site\_fract\_z

|   |     |          |          |          |
|---|-----|----------|----------|----------|
| H | H1  | 0.710005 | 0.675384 | 0.458153 |
| H | H2  | 0.708173 | 0.541273 | 0.463457 |
| H | H3  | 0.435086 | 0.573494 | 0.337881 |
| H | H4  | 0.579657 | 0.632006 | 0.328033 |
| H | H5  | 0.524251 | 0.676897 | 0.413749 |
| H | H6  | 0.514311 | 0.358651 | 0.416338 |
| H | H7  | 0.574124 | 0.456951 | 0.329263 |
| H | H8  | 0.429125 | 0.377319 | 0.339666 |
| H | H9  | 0.710638 | 0.684039 | 0.620662 |
| H | H10 | 0.823823 | 0.661801 | 0.608322 |
| H | H11 | 0.692143 | 0.546146 | 0.626246 |
| H | H12 | 0.369181 | 0.343227 | 0.579594 |
| H | H13 | 0.489134 | 0.422202 | 0.643595 |
| H | H14 | 0.494906 | 0.351669 | 0.547433 |
| H | H15 | 0.488443 | 0.660866 | 0.541459 |
| H | H16 | 0.505581 | 0.599927 | 0.639127 |
| H | H17 | 0.374253 | 0.544108 | 0.589683 |
| C | C18 | 0.459576 | 0.399553 | 0.575281 |
| C | C19 | 0.463497 | 0.582397 | 0.574740 |
| C | C20 | 0.735237 | 0.626922 | 0.593239 |
| C | C21 | 0.720304 | 0.615566 | 0.496293 |

|   |     |          |          |          |
|---|-----|----------|----------|----------|
| C | C22 | 0.483040 | 0.501267 | 0.522257 |
| C | C23 | 0.504598 | 0.510987 | 0.432862 |
| C | C24 | 0.512141 | 0.604507 | 0.376566 |
| C | C25 | 0.506627 | 0.420923 | 0.378118 |
| O | O26 | 0.086461 | 0.293942 | 0.515220 |
| O | O27 | 0.300672 | 0.399083 | 0.856276 |
| O | O28 | 0.826549 | 0.431557 | 0.631394 |
| O | O29 | 0.488452 | 0.153262 | 0.475550 |
| O | O30 | 0.734238 | 0.620277 | 0.841317 |
| O | O31 | 0.967641 | 0.730522 | 0.182166 |
| O | O32 | 0.495681 | 0.759700 | 0.969536 |
| O | O33 | 0.150071 | 0.477764 | 0.814755 |
| O | O34 | 0.407077 | 0.955726 | 0.181583 |
| O | O35 | 0.620770 | 0.058329 | 0.531538 |
| O | O36 | 0.162520 | 0.097001 | 0.302849 |
| O | O37 | 0.825742 | 0.816532 | 0.134235 |
| O | O38 | 0.716701 | 0.291222 | 0.513466 |
| O | O39 | 0.602396 | 0.416777 | 0.853821 |
| O | O40 | 0.569055 | 0.899967 | 0.637687 |
| O | O41 | 0.855990 | 0.865131 | 0.479557 |
| O | O42 | 0.378044 | 0.631996 | 0.846723 |
| O | O43 | 0.271969 | 0.752006 | 0.190687 |
| O | O44 | 0.242062 | 0.246949 | 0.970179 |
| O | O45 | 0.522974 | 0.187987 | 0.813871 |
| O | O46 | 0.048574 | 0.963432 | 0.180964 |
| O | O47 | 0.935846 | 0.095733 | 0.531009 |
| O | O48 | 0.904775 | 0.579469 | 0.298510 |
| O | O49 | 0.191707 | 0.522875 | 0.146310 |
| O | O50 | 0.703087 | 0.936821 | 0.512544 |
| O | O51 | 0.581958 | 0.702226 | 0.848062 |
| O | O52 | 0.097988 | 0.176156 | 0.636722 |
| O | O53 | 0.144001 | 0.518544 | 0.478334 |
| O | O54 | 0.369878 | 0.264975 | 0.844826 |
| O | O55 | 0.252787 | 0.035180 | 0.188318 |
| O | O56 | 0.757752 | 0.510866 | 0.964869 |
| O | O57 | 0.812793 | 0.849028 | 0.808964 |
| O | O58 | 0.038518 | 0.597195 | 0.178639 |
| O | O59 | 0.919770 | 0.358314 | 0.529858 |
| O | O60 | 0.426346 | 0.841905 | 0.302898 |
| O | O61 | 0.482729 | 0.183225 | 0.143916 |
| O | O62 | 0.894373 | 0.701830 | 0.450277 |
| O | O63 | 0.694628 | 0.613931 | 0.099565 |
| O | O64 | 0.166570 | 0.581804 | 0.321834 |
| O | O65 | 0.502703 | 0.859907 | 0.481457 |

|    |       |          |          |          |
|----|-------|----------|----------|----------|
| 0  | 066   | 0.585705 | 0.057265 | 0.768388 |
| 0  | 067   | 0.364634 | 0.951855 | 0.433990 |
| 0  | 068   | 0.826121 | 0.917192 | 0.654777 |
| 0  | 069   | 0.170620 | 0.198611 | 0.815854 |
| 0  | 070   | 0.256174 | 0.389898 | 0.112550 |
| 0  | 071   | 0.025358 | 0.280202 | 0.763988 |
| 0  | 072   | 0.496797 | 0.248342 | 0.988168 |
| 0  | 073   | 0.841029 | 0.529449 | 0.142251 |
| 0  | 074   | 0.277258 | 0.715753 | 0.443541 |
| 0  | 075   | 0.391117 | 0.593257 | 0.103105 |
| 0  | 076   | 0.422191 | 0.103884 | 0.320537 |
| 0  | 077   | 0.128439 | 0.144042 | 0.479089 |
| 0  | 078   | 0.943220 | 0.048020 | 0.776182 |
| 0  | 079   | 0.059852 | 0.914314 | 0.427666 |
| 0  | 080   | 0.096727 | 0.439067 | 0.655534 |
| 0  | 081   | 0.801584 | 0.489543 | 0.807987 |
| 0  | 082   | 0.613423 | 0.381288 | 0.108137 |
| 0  | 083   | 0.721219 | 0.261041 | 0.764105 |
| 0  | 084   | 0.745029 | 0.762118 | 0.983787 |
| 0  | 085   | 0.471058 | 0.822439 | 0.146137 |
| 0  | 086   | 0.289880 | 0.082598 | 0.443706 |
| 0  | 087   | 0.409218 | 0.310815 | 0.104087 |
| 0  | 088   | 0.888771 | 0.821353 | 0.314862 |
| 0  | 089   | 0.851372 | 0.483634 | 0.471209 |
| 0  | 090   | 0.955412 | 0.414097 | 0.771806 |
| 0  | 091   | 0.074234 | 0.647608 | 0.431098 |
| 0  | 092   | 0.563380 | 0.177923 | 0.654739 |
| 0  | 093   | 0.508376 | 0.831798 | 0.816515 |
| 0  | 094   | 0.623797 | 0.746452 | 0.113051 |
| 0  | 095   | 0.738533 | 0.976946 | 0.772561 |
| 0  | 096   | 0.237285 | 0.502874 | 0.990305 |
| 0  | 097   | 0.179161 | 0.161657 | 0.146750 |
| Al | Al98  | 0.933714 | 0.607221 | 0.412097 |
| Al | Al99  | 0.600623 | 0.941687 | 0.748972 |
| Al | Al100 | 0.270471 | 0.275860 | 0.083599 |
| Al | Al101 | 0.392390 | 0.843448 | 0.414916 |
| Al | Al102 | 0.059246 | 0.174991 | 0.747795 |
| Al | Al103 | 0.727747 | 0.509344 | 0.078593 |
| Al | Al104 | 0.154884 | 0.053675 | 0.414512 |
| Al | Al105 | 0.826648 | 0.399023 | 0.744486 |
| Al | Al106 | 0.495680 | 0.731522 | 0.083000 |
| Al | Al107 | 0.062009 | 0.402039 | 0.543518 |
| Al | Al108 | 0.719271 | 0.734025 | 0.871140 |
| Al | Al109 | 0.390576 | 0.069198 | 0.208260 |

|    |       |          |          |          |
|----|-------|----------|----------|----------|
| Al | Al110 | 0.596434 | 0.169046 | 0.543735 |
| Al | Al111 | 0.266092 | 0.502905 | 0.877222 |
| Al | Al112 | 0.932254 | 0.834234 | 0.207174 |
| Al | Al113 | 0.833215 | 0.953663 | 0.541583 |
| Al | Al114 | 0.497555 | 0.279020 | 0.875595 |
| Al | Al115 | 0.166727 | 0.613604 | 0.209055 |
| Si | Si116 | 0.927197 | 0.830197 | 0.416978 |
| P  | P117  | 0.061723 | 0.176265 | 0.540026 |
| P  | P118  | 0.723911 | 0.509058 | 0.867803 |
| P  | P119  | 0.393779 | 0.842800 | 0.205538 |
| P  | P120  | 0.829589 | 0.391268 | 0.536672 |
| P  | P121  | 0.491295 | 0.731435 | 0.870818 |
| P  | P122  | 0.160194 | 0.063633 | 0.205624 |
| P  | P123  | 0.599227 | 0.939217 | 0.541122 |
| P  | P124  | 0.270557 | 0.277546 | 0.872268 |
| P  | P125  | 0.938163 | 0.610403 | 0.200932 |
| P  | P126  | 0.598686 | 0.171178 | 0.750155 |
| P  | P127  | 0.269347 | 0.502506 | 0.087714 |
| P  | P128  | 0.164858 | 0.615961 | 0.418385 |
| P  | P129  | 0.830177 | 0.948187 | 0.752525 |
| P  | P130  | 0.500213 | 0.280874 | 0.085928 |
| P  | P131  | 0.390124 | 0.071899 | 0.417967 |
| P  | P132  | 0.056926 | 0.402368 | 0.751207 |
| P  | P133  | 0.722929 | 0.734873 | 0.082845 |

***TS-HT-ZCH3-C4-1-Si-AIPO-34***

|                                |    |                    |          |          |
|--------------------------------|----|--------------------|----------|----------|
| data_                          |    |                    |          |          |
| _audit_creation_method         |    | 'Materials Studio' |          |          |
| _cell_length_a                 |    | 13.885913          |          |          |
| _cell_length_b                 |    | 13.885913          |          |          |
| _cell_length_c                 |    | 15.094859          |          |          |
| _cell_angle_alpha              |    | 90.000000          |          |          |
| _cell_angle_beta               |    | 90.000000          |          |          |
| _cell_angle_gamma              |    | 120.000000         |          |          |
| _symmetry_space_group_name_H-M |    | 'P1'               |          |          |
| loop_                          |    |                    |          |          |
| _atom_site_type_symbol         |    |                    |          |          |
| _atom_site_label               |    |                    |          |          |
| _atom_site_fract_x             |    |                    |          |          |
| _atom_site_fract_y             |    |                    |          |          |
| _atom_site_fract_z             |    |                    |          |          |
| H                              | H1 | 0.731247           | 0.704050 | 0.492653 |

|   |     |          |          |          |
|---|-----|----------|----------|----------|
| H | H2  | 0.761918 | 0.601389 | 0.547355 |
| H | H3  | 0.702652 | 0.574017 | 0.432942 |
| H | H4  | 0.450595 | 0.522750 | 0.680074 |
| H | H5  | 0.594942 | 0.573231 | 0.687287 |
| H | H6  | 0.544814 | 0.655142 | 0.635711 |
| H | H7  | 0.514830 | 0.432221 | 0.564487 |
| H | H8  | 0.442988 | 0.592520 | 0.484291 |
| H | H9  | 0.377458 | 0.348525 | 0.447288 |
| H | H10 | 0.317648 | 0.428108 | 0.396155 |
| H | H11 | 0.614160 | 0.566763 | 0.525994 |
| C | C12 | 0.727831 | 0.624456 | 0.492283 |
| C | C13 | 0.529907 | 0.570596 | 0.645069 |
| C | C14 | 0.522846 | 0.514422 | 0.557181 |
| C | C15 | 0.445336 | 0.515500 | 0.490524 |
| C | C16 | 0.377384 | 0.426490 | 0.441561 |
| O | O17 | 0.085585 | 0.306604 | 0.501353 |
| O | O18 | 0.301299 | 0.413553 | 0.844596 |
| O | O19 | 0.150961 | 0.492508 | 0.802129 |
| O | O20 | 0.161277 | 0.108828 | 0.290822 |
| O | O21 | 0.097156 | 0.189983 | 0.623785 |
| O | O22 | 0.371458 | 0.280317 | 0.832600 |
| O | O23 | 0.253908 | 0.049089 | 0.176786 |
| O | O24 | 0.483370 | 0.197761 | 0.131461 |
| O | O25 | 0.172347 | 0.213703 | 0.802071 |
| O | O26 | 0.256899 | 0.403762 | 0.098653 |
| O | O27 | 0.026039 | 0.294877 | 0.751597 |
| O | O28 | 0.423993 | 0.116399 | 0.308001 |
| O | O29 | 0.131475 | 0.159375 | 0.466741 |
| O | O30 | 0.100416 | 0.453340 | 0.642576 |
| O | O31 | 0.291149 | 0.096444 | 0.430230 |
| O | O32 | 0.410425 | 0.325203 | 0.089425 |
| O | O33 | 0.181351 | 0.176462 | 0.135274 |
| O | O34 | 0.735502 | 0.634890 | 0.830870 |
| O | O35 | 0.969528 | 0.744909 | 0.167871 |
| O | O36 | 0.825647 | 0.829987 | 0.124414 |
| O | O37 | 0.569553 | 0.912425 | 0.625487 |
| O | O38 | 0.853475 | 0.875030 | 0.467128 |
| O | O39 | 0.908639 | 0.595581 | 0.285439 |
| O | O40 | 0.704227 | 0.951371 | 0.500501 |
| O | O41 | 0.584052 | 0.717723 | 0.839141 |
| O | O42 | 0.814086 | 0.863398 | 0.796290 |
| O | O43 | 0.897886 | 0.715345 | 0.438947 |
| O | O44 | 0.696653 | 0.628414 | 0.084707 |
| O | O45 | 0.503178 | 0.871001 | 0.469256 |

|    |      |          |          |          |
|----|------|----------|----------|----------|
| 0  | 046  | 0.828000 | 0.931497 | 0.642124 |
| 0  | 047  | 0.842031 | 0.543335 | 0.130065 |
| 0  | 048  | 0.893904 | 0.835470 | 0.303137 |
| 0  | 049  | 0.851634 | 0.495190 | 0.456037 |
| 0  | 050  | 0.509841 | 0.846001 | 0.803991 |
| 0  | 051  | 0.624670 | 0.759961 | 0.098944 |
| 0  | 052  | 0.739696 | 0.991097 | 0.759494 |
| 0  | 053  | 0.825444 | 0.446668 | 0.617111 |
| 0  | 054  | 0.489614 | 0.168919 | 0.462962 |
| 0  | 055  | 0.618288 | 0.069727 | 0.518944 |
| 0  | 056  | 0.718982 | 0.302892 | 0.500385 |
| 0  | 057  | 0.603962 | 0.431368 | 0.841830 |
| 0  | 058  | 0.524732 | 0.202923 | 0.800733 |
| 0  | 059  | 0.937114 | 0.107494 | 0.516078 |
| 0  | 060  | 0.922178 | 0.373721 | 0.519026 |
| 0  | 061  | 0.587588 | 0.072190 | 0.755085 |
| 0  | 062  | 0.944241 | 0.062513 | 0.763841 |
| 0  | 063  | 0.802591 | 0.504633 | 0.794163 |
| 0  | 064  | 0.614550 | 0.395335 | 0.094453 |
| 0  | 065  | 0.723028 | 0.276174 | 0.750687 |
| 0  | 066  | 0.957148 | 0.429929 | 0.756356 |
| 0  | 067  | 0.564868 | 0.192882 | 0.641688 |
| 0  | 068  | 0.494929 | 0.775722 | 0.957787 |
| 0  | 069  | 0.760599 | 0.523747 | 0.952134 |
| 0  | 070  | 0.750804 | 0.780516 | 0.972051 |
| 0  | 071  | 0.408405 | 0.970026 | 0.167837 |
| 0  | 072  | 0.380011 | 0.646142 | 0.834811 |
| 0  | 073  | 0.273379 | 0.766373 | 0.177618 |
| 0  | 074  | 0.049893 | 0.977597 | 0.167122 |
| 0  | 075  | 0.193020 | 0.536522 | 0.134484 |
| 0  | 076  | 0.146709 | 0.531350 | 0.464488 |
| 0  | 077  | 0.040129 | 0.611371 | 0.164484 |
| 0  | 078  | 0.426668 | 0.857355 | 0.290601 |
| 0  | 079  | 0.167346 | 0.596421 | 0.308828 |
| 0  | 080  | 0.367260 | 0.966528 | 0.423387 |
| 0  | 081  | 0.278577 | 0.729423 | 0.430969 |
| 0  | 082  | 0.391878 | 0.607237 | 0.089489 |
| 0  | 083  | 0.060345 | 0.928725 | 0.419282 |
| 0  | 084  | 0.472916 | 0.836526 | 0.134793 |
| 0  | 085  | 0.075465 | 0.660092 | 0.420154 |
| 0  | 086  | 0.241524 | 0.259529 | 0.957215 |
| 0  | 087  | 0.498228 | 0.261148 | 0.975136 |
| 0  | 088  | 0.236780 | 0.517573 | 0.977778 |
| Al | Al89 | 0.271314 | 0.289633 | 0.070527 |



|    |       |          |          |          |
|----|-------|----------|----------|----------|
| Al | Al90  | 0.059839 | 0.189530 | 0.735055 |
| Al | Al91  | 0.155634 | 0.067078 | 0.402716 |
| Al | Al92  | 0.064222 | 0.416208 | 0.530856 |
| Al | Al93  | 0.391939 | 0.083256 | 0.195596 |
| Al | Al94  | 0.498976 | 0.293382 | 0.862994 |
| Al | Al95  | 0.935705 | 0.620330 | 0.399293 |
| Al | Al96  | 0.601802 | 0.955974 | 0.736359 |
| Al | Al97  | 0.496540 | 0.745726 | 0.070698 |
| Al | Al98  | 0.721917 | 0.749738 | 0.860098 |
| Al | Al99  | 0.934390 | 0.848295 | 0.194781 |
| Al | Al100 | 0.833660 | 0.966210 | 0.528737 |
| Al | Al101 | 0.729373 | 0.523301 | 0.065614 |
| Al | Al102 | 0.827783 | 0.414408 | 0.730274 |
| Al | Al103 | 0.597109 | 0.182474 | 0.530734 |
| Al | Al104 | 0.393770 | 0.857361 | 0.402927 |
| Al | Al105 | 0.266723 | 0.517628 | 0.865041 |
| Al | Al106 | 0.168119 | 0.628072 | 0.195996 |
| Si | Si107 | 0.928500 | 0.843062 | 0.405961 |
| P  | P108  | 0.062329 | 0.189638 | 0.526680 |
| P  | P109  | 0.161107 | 0.077373 | 0.193342 |
| P  | P110  | 0.271332 | 0.291821 | 0.859690 |
| P  | P111  | 0.270020 | 0.516577 | 0.074799 |
| P  | P112  | 0.391876 | 0.086011 | 0.405578 |
| P  | P113  | 0.058586 | 0.417229 | 0.737917 |
| P  | P114  | 0.725737 | 0.523400 | 0.855618 |
| P  | P115  | 0.599172 | 0.951500 | 0.528787 |
| P  | P116  | 0.940224 | 0.625037 | 0.187467 |
| P  | P117  | 0.831479 | 0.962433 | 0.739801 |
| P  | P118  | 0.724990 | 0.749713 | 0.070349 |
| P  | P119  | 0.830550 | 0.404749 | 0.523236 |
| P  | P120  | 0.600456 | 0.186129 | 0.737005 |
| P  | P121  | 0.501335 | 0.294859 | 0.072578 |
| P  | P122  | 0.395024 | 0.857357 | 0.192943 |
| P  | P123  | 0.492555 | 0.746470 | 0.859563 |
| P  | P124  | 0.166450 | 0.629445 | 0.405779 |

***TS-HT-ZCH3-C5-Si-AIPO-34***

```

data_
_audit_creation_method    'Materials Studio'
_cell_length_a            13.885913
_cell_length_b            13.885913
_cell_length_c            15.094859

```

```

_cell_angle_alpha      90.000000
_cell_angle_beta      90.000000
_cell_angle_gamma     120.000000
_symmetry_space_group_name_H-M  'P1'
loop_
_atom_site_type_symbol
_atom_site_label
_atom_site_fract_x
_atom_site_fract_y
_atom_site_fract_z
  H      H1          0.731922      0.706824      0.482487
  H      H2          0.760707      0.608479      0.546361
  H      H3          0.704627      0.572449      0.431082
  H      H4          0.453749      0.552733      0.670130
  H      H5          0.596925      0.597462      0.679001
  H      H6          0.552041      0.677172      0.617012
  H      H7          0.457627      0.612462      0.474156
  H      H8          0.361397      0.362017      0.438769
  H      H9          0.322272      0.457509      0.386339
  H      H10         0.613106      0.572722      0.520087
  H      H11         0.568742      0.416572      0.620285
  H      H12         0.509229      0.366184      0.514328
  H      H13         0.423969      0.358172      0.604439
  C      C14         0.505486      0.409520      0.573407
  C      C15         0.730041      0.628233      0.487263
  C      C16         0.533010      0.592914      0.634224
  C      C17         0.522172      0.524044      0.552127
  C      C18         0.449340      0.530660      0.482445
  C      C19         0.374808      0.445725      0.433154
  O      O20         0.084317      0.303750      0.501400
  O      O21         0.300772      0.410958      0.843827
  O      O22         0.151341      0.491198      0.802431
  O      O23         0.162139      0.107615      0.291121
  O      O24         0.099153      0.189638      0.624410
  O      O25         0.371836      0.278445      0.832978
  O      O26         0.253781      0.046739      0.177101
  O      O27         0.483228      0.194567      0.131509
  O      O28         0.172605      0.210489      0.802634
  O      O29         0.257203      0.401386      0.099719
  O      O30         0.026941      0.292822      0.753312
  O      O31         0.423711      0.113303      0.308388
  O      O32         0.128270      0.154828      0.467134
  O      O33         0.099608      0.450006      0.643263
  O      O34         0.292573      0.096374      0.431056

```

|   |     |          |          |          |
|---|-----|----------|----------|----------|
| 0 | 035 | 0.410441 | 0.322173 | 0.089596 |
| 0 | 036 | 0.181049 | 0.173847 | 0.135164 |
| 0 | 037 | 0.735942 | 0.632984 | 0.829916 |
| 0 | 038 | 0.968421 | 0.742135 | 0.168227 |
| 0 | 039 | 0.824988 | 0.828167 | 0.125810 |
| 0 | 040 | 0.569175 | 0.915816 | 0.626391 |
| 0 | 041 | 0.858539 | 0.876637 | 0.467982 |
| 0 | 042 | 0.907896 | 0.593458 | 0.286302 |
| 0 | 043 | 0.702554 | 0.943328 | 0.503044 |
| 0 | 044 | 0.584434 | 0.715241 | 0.840950 |
| 0 | 045 | 0.815065 | 0.862468 | 0.799647 |
| 0 | 046 | 0.898089 | 0.713873 | 0.439621 |
| 0 | 047 | 0.696311 | 0.625555 | 0.089010 |
| 0 | 048 | 0.502765 | 0.869576 | 0.470522 |
| 0 | 049 | 0.827925 | 0.926132 | 0.644040 |
| 0 | 050 | 0.841964 | 0.540144 | 0.130915 |
| 0 | 051 | 0.894165 | 0.833641 | 0.303907 |
| 0 | 052 | 0.852019 | 0.494255 | 0.457446 |
| 0 | 053 | 0.510341 | 0.843022 | 0.803994 |
| 0 | 054 | 0.624067 | 0.757222 | 0.099426 |
| 0 | 055 | 0.740322 | 0.988848 | 0.759576 |
| 0 | 056 | 0.826789 | 0.446811 | 0.618646 |
| 0 | 057 | 0.490490 | 0.164366 | 0.463192 |
| 0 | 058 | 0.624825 | 0.069686 | 0.514693 |
| 0 | 059 | 0.718073 | 0.302853 | 0.502693 |
| 0 | 060 | 0.604294 | 0.429674 | 0.842722 |
| 0 | 061 | 0.524432 | 0.202027 | 0.799274 |
| 0 | 062 | 0.935619 | 0.105547 | 0.520274 |
| 0 | 063 | 0.921029 | 0.371380 | 0.520240 |
| 0 | 064 | 0.589418 | 0.070679 | 0.761373 |
| 0 | 065 | 0.944886 | 0.060461 | 0.763710 |
| 0 | 066 | 0.803356 | 0.502146 | 0.796630 |
| 0 | 067 | 0.614523 | 0.392185 | 0.094869 |
| 0 | 068 | 0.722736 | 0.274528 | 0.749899 |
| 0 | 069 | 0.956960 | 0.426969 | 0.757573 |
| 0 | 070 | 0.564009 | 0.182902 | 0.641868 |
| 0 | 071 | 0.494665 | 0.774014 | 0.958414 |
| 0 | 072 | 0.760054 | 0.523972 | 0.953489 |
| 0 | 073 | 0.750619 | 0.774737 | 0.973728 |
| 0 | 074 | 0.407484 | 0.966860 | 0.168131 |
| 0 | 075 | 0.380391 | 0.643646 | 0.835661 |
| 0 | 076 | 0.273449 | 0.763187 | 0.179400 |
| 0 | 077 | 0.049791 | 0.975368 | 0.168115 |
| 0 | 078 | 0.192254 | 0.533704 | 0.134394 |

|    |       |          |          |          |
|----|-------|----------|----------|----------|
| O  | O79   | 0.145107 | 0.528972 | 0.465705 |
| O  | O80   | 0.040161 | 0.609459 | 0.165851 |
| O  | O81   | 0.427601 | 0.856068 | 0.291520 |
| O  | O82   | 0.166685 | 0.592113 | 0.309508 |
| O  | O83   | 0.364547 | 0.962765 | 0.423583 |
| O  | O84   | 0.278799 | 0.726112 | 0.430831 |
| O  | O85   | 0.391372 | 0.604891 | 0.089807 |
| O  | O86   | 0.063349 | 0.926070 | 0.417950 |
| O  | O87   | 0.472817 | 0.833919 | 0.135768 |
| O  | O88   | 0.076079 | 0.658874 | 0.419582 |
| O  | O89   | 0.241992 | 0.258262 | 0.957524 |
| O  | O90   | 0.498498 | 0.258418 | 0.975207 |
| O  | O91   | 0.236521 | 0.513903 | 0.978057 |
| Al | Al92  | 0.271505 | 0.287348 | 0.070916 |
| Al | Al93  | 0.060590 | 0.187607 | 0.735634 |
| Al | Al94  | 0.156619 | 0.065486 | 0.402915 |
| Al | Al95  | 0.063075 | 0.413332 | 0.531577 |
| Al | Al96  | 0.391652 | 0.080421 | 0.195942 |
| Al | Al97  | 0.499327 | 0.291590 | 0.863216 |
| Al | Al98  | 0.935996 | 0.618597 | 0.399982 |
| Al | Al99  | 0.602450 | 0.954714 | 0.737969 |
| Al | Al100 | 0.496134 | 0.743340 | 0.071204 |
| Al | Al101 | 0.722227 | 0.747055 | 0.861488 |
| Al | Al102 | 0.934171 | 0.846099 | 0.195432 |
| Al | Al103 | 0.834107 | 0.963296 | 0.531185 |
| Al | Al104 | 0.728979 | 0.520900 | 0.067180 |
| Al | Al105 | 0.828212 | 0.412791 | 0.731461 |
| Al | Al106 | 0.598663 | 0.178890 | 0.530562 |
| Al | Al107 | 0.393298 | 0.854922 | 0.403660 |
| Al | Al108 | 0.266782 | 0.515158 | 0.865276 |
| Al | Al109 | 0.167798 | 0.624910 | 0.196854 |
| Si | Si110 | 0.930974 | 0.842378 | 0.406153 |
| P  | P111  | 0.061428 | 0.187230 | 0.527848 |
| P  | P112  | 0.161190 | 0.075287 | 0.193738 |
| P  | P113  | 0.271530 | 0.289645 | 0.859856 |
| P  | P114  | 0.269699 | 0.513776 | 0.075197 |
| P  | P115  | 0.391691 | 0.083153 | 0.406028 |
| P  | P116  | 0.058644 | 0.414825 | 0.738872 |
| P  | P117  | 0.725914 | 0.521897 | 0.856535 |
| P  | P118  | 0.600166 | 0.949999 | 0.528974 |
| P  | P119  | 0.939792 | 0.622544 | 0.188300 |
| P  | P120  | 0.832016 | 0.959747 | 0.741146 |
| P  | P121  | 0.724458 | 0.746402 | 0.072283 |
| P  | P122  | 0.830473 | 0.403911 | 0.524887 |

|   |      |          |          |          |
|---|------|----------|----------|----------|
| P | P123 | 0.600591 | 0.182732 | 0.737994 |
| P | P124 | 0.501339 | 0.291815 | 0.072742 |
| P | P125 | 0.394996 | 0.854774 | 0.193948 |
| P | P126 | 0.492822 | 0.744055 | 0.860384 |
| P | P127 | 0.166108 | 0.626630 | 0.406109 |

***TS-HT-ZC2H5-C4-1-Si-ALPO-34***

data\_

\_audit\_creation\_method 'Materials Studio'

\_cell\_length\_a 13.885913

\_cell\_length\_b 13.885913

\_cell\_length\_c 15.094859

\_cell\_angle\_alpha 90.000000

\_cell\_angle\_beta 90.000000

\_cell\_angle\_gamma 120.000000

\_symmetry\_space\_group\_name\_H-M 'P1'

loop\_

\_atom\_site\_type\_symbol

\_atom\_site\_label

\_atom\_site\_fract\_x

\_atom\_site\_fract\_y

\_atom\_site\_fract\_z

|   |     |          |          |          |
|---|-----|----------|----------|----------|
| H | H1  | 0.419475 | 0.524893 | 0.664360 |
| H | H2  | 0.563409 | 0.572983 | 0.672240 |
| H | H3  | 0.515850 | 0.656189 | 0.619392 |
| H | H4  | 0.479690 | 0.430091 | 0.550110 |
| H | H5  | 0.410722 | 0.592207 | 0.470927 |
| H | H6  | 0.359909 | 0.356375 | 0.418876 |
| H | H7  | 0.300800 | 0.437413 | 0.369253 |
| H | H8  | 0.580901 | 0.562357 | 0.511169 |
| H | H9  | 0.713488 | 0.693271 | 0.472497 |
| H | H10 | 0.568980 | 0.537537 | 0.362276 |
| H | H11 | 0.664751 | 0.487662 | 0.357338 |
| H | H12 | 0.700457 | 0.624510 | 0.318523 |
| H | H13 | 0.723482 | 0.570618 | 0.506664 |
| C | C14 | 0.498996 | 0.571054 | 0.629410 |
| C | C15 | 0.492064 | 0.513949 | 0.541543 |
| C | C16 | 0.416372 | 0.516733 | 0.473843 |
| C | C17 | 0.356890 | 0.433072 | 0.417068 |
| C | C18 | 0.657345 | 0.561101 | 0.369585 |
| C | C19 | 0.697635 | 0.610064 | 0.457644 |
| O | O20 | 0.082294 | 0.301289 | 0.503135 |

|   |     |          |          |          |
|---|-----|----------|----------|----------|
| 0 | 021 | 0.301718 | 0.410570 | 0.844437 |
| 0 | 022 | 0.151477 | 0.489787 | 0.803548 |
| 0 | 023 | 0.164236 | 0.108788 | 0.291768 |
| 0 | 024 | 0.098477 | 0.187460 | 0.625604 |
| 0 | 025 | 0.371618 | 0.276855 | 0.834456 |
| 0 | 026 | 0.255359 | 0.046390 | 0.178356 |
| 0 | 027 | 0.484698 | 0.194551 | 0.133190 |
| 0 | 028 | 0.172346 | 0.209886 | 0.804481 |
| 0 | 029 | 0.258846 | 0.401136 | 0.102362 |
| 0 | 030 | 0.027036 | 0.291839 | 0.753661 |
| 0 | 031 | 0.424609 | 0.114196 | 0.310195 |
| 0 | 032 | 0.131049 | 0.156123 | 0.468193 |
| 0 | 033 | 0.099910 | 0.449563 | 0.644067 |
| 0 | 034 | 0.290169 | 0.091980 | 0.431878 |
| 0 | 035 | 0.411594 | 0.322119 | 0.091971 |
| 0 | 036 | 0.181873 | 0.172578 | 0.135391 |
| 0 | 037 | 0.734954 | 0.631112 | 0.828270 |
| 0 | 038 | 0.968239 | 0.740832 | 0.172718 |
| 0 | 039 | 0.828682 | 0.828851 | 0.122205 |
| 0 | 040 | 0.568708 | 0.912089 | 0.627618 |
| 0 | 041 | 0.851984 | 0.869069 | 0.469151 |
| 0 | 042 | 0.908797 | 0.587073 | 0.286443 |
| 0 | 043 | 0.703633 | 0.945694 | 0.504054 |
| 0 | 044 | 0.583341 | 0.713600 | 0.838086 |
| 0 | 045 | 0.815029 | 0.861688 | 0.801126 |
| 0 | 046 | 0.897336 | 0.712036 | 0.434128 |
| 0 | 047 | 0.697375 | 0.624972 | 0.092937 |
| 0 | 048 | 0.503196 | 0.867919 | 0.471506 |
| 0 | 049 | 0.827707 | 0.925369 | 0.645349 |
| 0 | 050 | 0.843984 | 0.540161 | 0.130227 |
| 0 | 051 | 0.888674 | 0.834200 | 0.303078 |
| 0 | 052 | 0.851095 | 0.493613 | 0.459253 |
| 0 | 053 | 0.509574 | 0.842764 | 0.805831 |
| 0 | 054 | 0.626025 | 0.757378 | 0.102638 |
| 0 | 055 | 0.739929 | 0.987679 | 0.761001 |
| 0 | 056 | 0.825092 | 0.443178 | 0.619961 |
| 0 | 057 | 0.488480 | 0.163879 | 0.465716 |
| 0 | 058 | 0.620994 | 0.067639 | 0.518144 |
| 0 | 059 | 0.717637 | 0.301170 | 0.502359 |
| 0 | 060 | 0.604081 | 0.427941 | 0.842982 |
| 0 | 061 | 0.524327 | 0.199666 | 0.802086 |
| 0 | 062 | 0.936633 | 0.101346 | 0.519695 |
| 0 | 063 | 0.920843 | 0.370641 | 0.520541 |
| 0 | 064 | 0.588585 | 0.069152 | 0.760104 |

|    |       |          |          |          |
|----|-------|----------|----------|----------|
| O  | 065   | 0.944580 | 0.059553 | 0.765197 |
| O  | 066   | 0.803838 | 0.500635 | 0.798411 |
| O  | 067   | 0.615761 | 0.392202 | 0.096871 |
| O  | 068   | 0.722970 | 0.272994 | 0.752980 |
| O  | 069   | 0.957257 | 0.426122 | 0.758494 |
| O  | 070   | 0.565122 | 0.186224 | 0.643789 |
| O  | 071   | 0.498336 | 0.772727 | 0.959329 |
| O  | 072   | 0.758794 | 0.524737 | 0.954031 |
| O  | 073   | 0.745143 | 0.768296 | 0.973375 |
| O  | 074   | 0.410189 | 0.967319 | 0.170690 |
| O  | 075   | 0.379463 | 0.643440 | 0.837602 |
| O  | 076   | 0.274758 | 0.763727 | 0.179955 |
| O  | 077   | 0.051390 | 0.974374 | 0.169898 |
| O  | 078   | 0.194615 | 0.534158 | 0.135960 |
| O  | 079   | 0.145801 | 0.526873 | 0.465897 |
| O  | 080   | 0.042383 | 0.610315 | 0.164973 |
| O  | 081   | 0.428415 | 0.853559 | 0.292630 |
| O  | 082   | 0.167767 | 0.592160 | 0.310178 |
| O  | 083   | 0.366265 | 0.962138 | 0.423909 |
| O  | 084   | 0.279143 | 0.724738 | 0.432332 |
| O  | 085   | 0.393322 | 0.604406 | 0.090759 |
| O  | 086   | 0.058563 | 0.926235 | 0.416886 |
| O  | 087   | 0.473910 | 0.833532 | 0.136300 |
| O  | 088   | 0.076028 | 0.656642 | 0.421143 |
| O  | 089   | 0.243060 | 0.259019 | 0.959015 |
| O  | 090   | 0.499321 | 0.258862 | 0.976979 |
| O  | 091   | 0.237495 | 0.512154 | 0.979712 |
| Al | Al92  | 0.272677 | 0.287096 | 0.072355 |
| Al | Al93  | 0.060503 | 0.186345 | 0.736835 |
| Al | Al94  | 0.155325 | 0.064397 | 0.403377 |
| Al | Al95  | 0.062547 | 0.411957 | 0.532491 |
| Al | Al96  | 0.393200 | 0.080406 | 0.197758 |
| Al | Al97  | 0.499277 | 0.290282 | 0.864570 |
| Al | Al98  | 0.936053 | 0.617002 | 0.400281 |
| Al | Al99  | 0.602100 | 0.953154 | 0.738806 |
| Al | Al100 | 0.498198 | 0.743004 | 0.072428 |
| Al | Al101 | 0.720544 | 0.744477 | 0.860336 |
| Al | Al102 | 0.934172 | 0.845926 | 0.196130 |
| Al | Al103 | 0.833072 | 0.959821 | 0.531898 |
| Al | Al104 | 0.729921 | 0.520760 | 0.067977 |
| Al | Al105 | 0.827972 | 0.411119 | 0.732887 |
| Al | Al106 | 0.597447 | 0.178792 | 0.532432 |
| Al | Al107 | 0.393872 | 0.853505 | 0.404676 |
| Al | Al108 | 0.266884 | 0.514076 | 0.866619 |

|    |       |          |          |          |
|----|-------|----------|----------|----------|
| Al | Al109 | 0.169317 | 0.625376 | 0.197558 |
| Si | Si110 | 0.926629 | 0.839190 | 0.405318 |
| P  | P111  | 0.061535 | 0.185258 | 0.528828 |
| P  | P112  | 0.162642 | 0.074854 | 0.194759 |
| P  | P113  | 0.271910 | 0.289160 | 0.861079 |
| P  | P114  | 0.271417 | 0.513324 | 0.076804 |
| P  | P115  | 0.391228 | 0.082029 | 0.407463 |
| P  | P116  | 0.058837 | 0.413909 | 0.739682 |
| P  | P117  | 0.725415 | 0.520804 | 0.856577 |
| P  | P118  | 0.599655 | 0.948845 | 0.530623 |
| P  | P119  | 0.940977 | 0.620929 | 0.189185 |
| P  | P120  | 0.831791 | 0.958794 | 0.742423 |
| P  | P121  | 0.724890 | 0.745089 | 0.072889 |
| P  | P122  | 0.829712 | 0.402399 | 0.525727 |
| P  | P123  | 0.600722 | 0.182235 | 0.739599 |
| P  | P124  | 0.502499 | 0.291839 | 0.074589 |
| P  | P125  | 0.396526 | 0.854361 | 0.195118 |
| P  | P126  | 0.492986 | 0.743131 | 0.860842 |
| P  | P127  | 0.166428 | 0.625252 | 0.407146 |

***TS-HT-ZC3H7-C5-Si-AIPO-34***

data\_

\_audit\_creation\_method 'Materials Studio'

\_cell\_length\_a 13.885913

\_cell\_length\_b 13.885913

\_cell\_length\_c 15.094859

\_cell\_angle\_alpha 90.000000

\_cell\_angle\_beta 90.000000

\_cell\_angle\_gamma 120.000000

\_symmetry\_space\_group\_name\_H-M 'P1'

loop\_

\_atom\_site\_type\_symbol

\_atom\_site\_label

\_atom\_site\_fract\_x

\_atom\_site\_fract\_y

\_atom\_site\_fract\_z

|   |    |          |          |          |
|---|----|----------|----------|----------|
| H | H1 | 0.702397 | 0.694359 | 0.474602 |
| H | H2 | 0.316559 | 0.537474 | 0.616881 |
| H | H3 | 0.450291 | 0.598585 | 0.665121 |
| H | H4 | 0.424096 | 0.665937 | 0.576099 |
| H | H5 | 0.406886 | 0.597079 | 0.421873 |
| H | H6 | 0.335825 | 0.348951 | 0.408426 |



|   |     |          |          |          |
|---|-----|----------|----------|----------|
| H | H7  | 0.323582 | 0.438230 | 0.323848 |
| H | H8  | 0.530874 | 0.575609 | 0.530096 |
| H | H9  | 0.454168 | 0.421630 | 0.640687 |
| H | H10 | 0.445973 | 0.366718 | 0.533017 |
| H | H11 | 0.326011 | 0.353976 | 0.584067 |
| H | H12 | 0.800272 | 0.624272 | 0.580945 |
| H | H13 | 0.669937 | 0.501870 | 0.596304 |
| H | H14 | 0.693022 | 0.637581 | 0.628511 |
| H | H15 | 0.646891 | 0.454460 | 0.429339 |
| H | H16 | 0.693173 | 0.572444 | 0.355349 |
| H | H17 | 0.560957 | 0.511844 | 0.399601 |
| C | C18 | 0.709411 | 0.589767 | 0.579266 |
| C | C19 | 0.647293 | 0.531734 | 0.415958 |
| C | C20 | 0.415401 | 0.409659 | 0.575400 |
| C | C21 | 0.685534 | 0.610415 | 0.489022 |
| C | C22 | 0.405607 | 0.585247 | 0.602535 |
| C | C23 | 0.438220 | 0.521299 | 0.537185 |
| C | C24 | 0.396112 | 0.517966 | 0.445148 |
| C | C25 | 0.350845 | 0.430690 | 0.389639 |
| O | O26 | 0.086676 | 0.299901 | 0.508980 |
| O | O27 | 0.304702 | 0.406773 | 0.847149 |
| O | O28 | 0.155501 | 0.486474 | 0.805402 |
| O | O29 | 0.166695 | 0.107736 | 0.294753 |
| O | O30 | 0.099646 | 0.182257 | 0.629586 |
| O | O31 | 0.373391 | 0.272224 | 0.837452 |
| O | O32 | 0.256884 | 0.043166 | 0.182355 |
| O | O33 | 0.486580 | 0.190267 | 0.136761 |
| O | O34 | 0.174292 | 0.205782 | 0.808243 |
| O | O35 | 0.260967 | 0.397436 | 0.106701 |
| O | O36 | 0.029603 | 0.287868 | 0.757363 |
| O | O37 | 0.427471 | 0.109886 | 0.313472 |
| O | O38 | 0.136267 | 0.156496 | 0.471998 |
| O | O39 | 0.094535 | 0.445284 | 0.648075 |
| O | O40 | 0.293675 | 0.091464 | 0.434460 |
| O | O41 | 0.412704 | 0.317393 | 0.096470 |
| O | O42 | 0.181956 | 0.167498 | 0.137436 |
| O | O43 | 0.736784 | 0.627369 | 0.833189 |
| O | O44 | 0.970643 | 0.736471 | 0.177079 |
| O | O45 | 0.829578 | 0.823299 | 0.127652 |
| O | O46 | 0.572876 | 0.911539 | 0.630039 |
| O | O47 | 0.854197 | 0.865237 | 0.473827 |
| O | O48 | 0.904533 | 0.582577 | 0.291605 |
| O | O49 | 0.707070 | 0.944164 | 0.506088 |
| O | O50 | 0.585390 | 0.709645 | 0.842119 |

|   |     |          |          |          |
|---|-----|----------|----------|----------|
| 0 | 051 | 0.816307 | 0.856360 | 0.802634 |
| 0 | 052 | 0.906588 | 0.712755 | 0.441970 |
| 0 | 053 | 0.698295 | 0.620635 | 0.093626 |
| 0 | 054 | 0.507037 | 0.869145 | 0.474061 |
| 0 | 055 | 0.829990 | 0.924005 | 0.648203 |
| 0 | 056 | 0.845432 | 0.536260 | 0.134071 |
| 0 | 057 | 0.891302 | 0.828895 | 0.308569 |
| 0 | 058 | 0.859862 | 0.494003 | 0.466392 |
| 0 | 059 | 0.511236 | 0.837996 | 0.807778 |
| 0 | 060 | 0.627384 | 0.753244 | 0.105677 |
| 0 | 061 | 0.741650 | 0.983612 | 0.765427 |
| 0 | 062 | 0.833299 | 0.438334 | 0.625627 |
| 0 | 063 | 0.491014 | 0.160520 | 0.469085 |
| 0 | 064 | 0.627446 | 0.068565 | 0.521555 |
| 0 | 065 | 0.717558 | 0.303038 | 0.506779 |
| 0 | 066 | 0.605539 | 0.423979 | 0.846723 |
| 0 | 067 | 0.525803 | 0.195405 | 0.806111 |
| 0 | 068 | 0.940236 | 0.099305 | 0.521341 |
| 0 | 069 | 0.918697 | 0.359782 | 0.521321 |
| 0 | 070 | 0.589654 | 0.064716 | 0.764026 |
| 0 | 071 | 0.946283 | 0.055318 | 0.769775 |
| 0 | 072 | 0.804674 | 0.497031 | 0.800634 |
| 0 | 073 | 0.617111 | 0.388180 | 0.100415 |
| 0 | 074 | 0.724509 | 0.268363 | 0.757891 |
| 0 | 075 | 0.958492 | 0.420536 | 0.768940 |
| 0 | 076 | 0.567547 | 0.182991 | 0.647840 |
| 0 | 077 | 0.502121 | 0.771917 | 0.962624 |
| 0 | 078 | 0.761105 | 0.519109 | 0.957412 |
| 0 | 079 | 0.749252 | 0.768149 | 0.977202 |
| 0 | 080 | 0.410041 | 0.962394 | 0.173318 |
| 0 | 081 | 0.381624 | 0.639875 | 0.842970 |
| 0 | 082 | 0.274795 | 0.758838 | 0.183698 |
| 0 | 083 | 0.052528 | 0.969904 | 0.174966 |
| 0 | 084 | 0.195755 | 0.530254 | 0.138471 |
| 0 | 085 | 0.143764 | 0.524788 | 0.471765 |
| 0 | 086 | 0.041889 | 0.603206 | 0.174080 |
| 0 | 087 | 0.428570 | 0.850034 | 0.296208 |
| 0 | 088 | 0.175133 | 0.587165 | 0.314574 |
| 0 | 089 | 0.366523 | 0.958723 | 0.428171 |
| 0 | 090 | 0.282778 | 0.721004 | 0.437238 |
| 0 | 091 | 0.394293 | 0.600663 | 0.092011 |
| 0 | 092 | 0.061727 | 0.927171 | 0.421426 |
| 0 | 093 | 0.474100 | 0.828463 | 0.140280 |
| 0 | 094 | 0.081478 | 0.657200 | 0.418288 |

|    |       |          |          |          |
|----|-------|----------|----------|----------|
| O  | O95   | 0.245889 | 0.256136 | 0.962426 |
| O  | O96   | 0.500315 | 0.254827 | 0.980802 |
| O  | O97   | 0.237070 | 0.505069 | 0.982620 |
| Al | Al98  | 0.274144 | 0.283071 | 0.076016 |
| Al | Al99  | 0.062297 | 0.181888 | 0.740837 |
| Al | Al100 | 0.158780 | 0.064148 | 0.406504 |
| Al | Al101 | 0.061536 | 0.407455 | 0.536011 |
| Al | Al102 | 0.394508 | 0.076203 | 0.201166 |
| Al | Al103 | 0.500879 | 0.286166 | 0.868444 |
| Al | Al104 | 0.939962 | 0.616297 | 0.404401 |
| Al | Al105 | 0.604191 | 0.949511 | 0.741886 |
| Al | Al106 | 0.499754 | 0.739518 | 0.075550 |
| Al | Al107 | 0.722831 | 0.741297 | 0.864612 |
| Al | Al108 | 0.935641 | 0.840894 | 0.201427 |
| Al | Al109 | 0.836350 | 0.958065 | 0.534431 |
| Al | Al110 | 0.731588 | 0.516442 | 0.071350 |
| Al | Al111 | 0.830696 | 0.405980 | 0.738891 |
| Al | Al112 | 0.600221 | 0.177308 | 0.536198 |
| Al | Al113 | 0.395348 | 0.850986 | 0.408439 |
| Al | Al114 | 0.269341 | 0.509668 | 0.869907 |
| Al | Al115 | 0.170762 | 0.620032 | 0.202490 |
| Si | Si116 | 0.930644 | 0.836212 | 0.410773 |
| P  | P117  | 0.064857 | 0.183001 | 0.532545 |
| P  | P118  | 0.163810 | 0.071278 | 0.198302 |
| P  | P119  | 0.274275 | 0.285333 | 0.864348 |
| P  | P120  | 0.272362 | 0.508794 | 0.079641 |
| P  | P121  | 0.393450 | 0.079128 | 0.410814 |
| P  | P122  | 0.059530 | 0.409525 | 0.744638 |
| P  | P123  | 0.726979 | 0.516555 | 0.860374 |
| P  | P124  | 0.604067 | 0.948872 | 0.533178 |
| P  | P125  | 0.940848 | 0.616005 | 0.194833 |
| P  | P126  | 0.833575 | 0.955159 | 0.745809 |
| P  | P127  | 0.726785 | 0.741566 | 0.076351 |
| P  | P128  | 0.833364 | 0.398971 | 0.529996 |
| P  | P129  | 0.602263 | 0.178006 | 0.743764 |
| P  | P130  | 0.503861 | 0.287635 | 0.078521 |
| P  | P131  | 0.396540 | 0.849723 | 0.198570 |
| P  | P132  | 0.495383 | 0.739925 | 0.864579 |
| P  | P133  | 0.169946 | 0.622448 | 0.410288 |

***TS-C6-Cyclization-Si-ALPO-34***

data\_

```

_audit_creation_method    'Materials Studio'
_cell_length_a           13.885913
_cell_length_b           13.885913
_cell_length_c           15.094859
_cell_angle_alpha        90.000000
_cell_angle_beta         90.000000
_cell_angle_gamma        120.000000
_symmetry_space_group_name_H-M  'P1'
loop_
_atom_site_type_symbol
_atom_site_label
_atom_site_fract_x
_atom_site_fract_y
_atom_site_fract_z
  H    H1           0.547186           0.632670           0.587956
  H    H2           0.623481           0.605146           0.675831
  H    H3           0.515817           0.432090           0.356160
  H    H4           0.748641           0.561255           0.528466
  H    H5           0.597704           0.402812           0.428151
  H    H6           0.567805           0.423239           0.612825
  H    H7           0.432235           0.478740           0.481858
  H    H8           0.417662           0.345891           0.500543
  H    H9           0.705340           0.589918           0.359377
  H    H10          0.618161           0.633758           0.405458
  H    H11          0.751339           0.695254           0.526739
  C    C12          0.574092           0.577739           0.615864
  C    C13          0.541508           0.476593           0.580520
  C    C14          0.560170           0.455284           0.419520
  C    C15          0.477912           0.435052           0.496045
  C    C16          0.652121           0.578587           0.416840
  C    C17          0.724900           0.615635           0.496219
  O    O18          0.087969           0.293997           0.504813
  O    O19          0.302087           0.399142           0.847805
  O    O20          0.826804           0.432324           0.620649
  O    O21          0.490566           0.155193           0.465684
  O    O22          0.734832           0.620681           0.830737
  O    O23          0.969143           0.731445           0.171588
  O    O24          0.495984           0.760370           0.959596
  O    O25          0.151690           0.478246           0.805013
  O    O26          0.408387           0.956485           0.171394
  O    O27          0.619912           0.056668           0.521931
  O    O28          0.163689           0.097125           0.293617
  O    O29          0.827039           0.817908           0.125563
  O    O30          0.719220           0.289986           0.503383

```

|   |     |          |          |          |
|---|-----|----------|----------|----------|
| 0 | 031 | 0.604022 | 0.416942 | 0.842708 |
| 0 | 032 | 0.570489 | 0.898691 | 0.627827 |
| 0 | 033 | 0.857183 | 0.864524 | 0.470224 |
| 0 | 034 | 0.380651 | 0.632202 | 0.836134 |
| 0 | 035 | 0.273506 | 0.752759 | 0.181245 |
| 0 | 036 | 0.242698 | 0.245610 | 0.960550 |
| 0 | 037 | 0.524849 | 0.188230 | 0.803889 |
| 0 | 038 | 0.050351 | 0.964530 | 0.171152 |
| 0 | 039 | 0.937805 | 0.095732 | 0.521200 |
| 0 | 040 | 0.905739 | 0.580738 | 0.288291 |
| 0 | 041 | 0.193196 | 0.523654 | 0.136085 |
| 0 | 042 | 0.705180 | 0.937804 | 0.502816 |
| 0 | 043 | 0.584862 | 0.704337 | 0.839346 |
| 0 | 044 | 0.099643 | 0.177136 | 0.627044 |
| 0 | 045 | 0.146075 | 0.519093 | 0.468293 |
| 0 | 046 | 0.371243 | 0.264993 | 0.835417 |
| 0 | 047 | 0.254510 | 0.036208 | 0.178909 |
| 0 | 048 | 0.758130 | 0.511833 | 0.954779 |
| 0 | 049 | 0.815332 | 0.850033 | 0.799651 |
| 0 | 050 | 0.040134 | 0.598159 | 0.168916 |
| 0 | 051 | 0.922375 | 0.359180 | 0.521126 |
| 0 | 052 | 0.428603 | 0.843402 | 0.292761 |
| 0 | 053 | 0.484185 | 0.184128 | 0.133947 |
| 0 | 054 | 0.896454 | 0.701729 | 0.440655 |
| 0 | 055 | 0.696682 | 0.615110 | 0.090883 |
| 0 | 056 | 0.167623 | 0.581442 | 0.311646 |
| 0 | 057 | 0.504189 | 0.858243 | 0.471519 |
| 0 | 058 | 0.588462 | 0.058388 | 0.757318 |
| 0 | 059 | 0.368543 | 0.953306 | 0.424575 |
| 0 | 060 | 0.827458 | 0.916491 | 0.644961 |
| 0 | 061 | 0.172117 | 0.199139 | 0.805989 |
| 0 | 062 | 0.257348 | 0.390634 | 0.101283 |
| 0 | 063 | 0.026538 | 0.280764 | 0.754399 |
| 0 | 064 | 0.499611 | 0.249481 | 0.978135 |
| 0 | 065 | 0.842791 | 0.530267 | 0.131908 |
| 0 | 066 | 0.278485 | 0.716519 | 0.432752 |
| 0 | 067 | 0.392722 | 0.593981 | 0.093128 |
| 0 | 068 | 0.424413 | 0.104688 | 0.310683 |
| 0 | 069 | 0.130630 | 0.144241 | 0.469825 |
| 0 | 070 | 0.944822 | 0.048670 | 0.765779 |
| 0 | 071 | 0.061475 | 0.914541 | 0.418655 |
| 0 | 072 | 0.099455 | 0.439444 | 0.645670 |
| 0 | 073 | 0.803714 | 0.490786 | 0.798212 |
| 0 | 074 | 0.615002 | 0.382274 | 0.098486 |

|    |       |          |          |          |
|----|-------|----------|----------|----------|
| O  | O75   | 0.723267 | 0.262480 | 0.753959 |
| O  | O76   | 0.748802 | 0.762734 | 0.974514 |
| O  | O77   | 0.472394 | 0.823278 | 0.135910 |
| O  | O78   | 0.291689 | 0.082428 | 0.433813 |
| O  | O79   | 0.410844 | 0.311653 | 0.093332 |
| O  | O80   | 0.891254 | 0.821386 | 0.305471 |
| O  | O81   | 0.852568 | 0.482341 | 0.459997 |
| O  | O82   | 0.957433 | 0.415473 | 0.760777 |
| O  | O83   | 0.075514 | 0.647293 | 0.420885 |
| O  | O84   | 0.565517 | 0.179615 | 0.644597 |
| O  | O85   | 0.509976 | 0.832553 | 0.806577 |
| O  | O86   | 0.625487 | 0.747625 | 0.102034 |
| O  | O87   | 0.740134 | 0.976948 | 0.762454 |
| O  | O88   | 0.239226 | 0.505205 | 0.980007 |
| O  | O89   | 0.181133 | 0.163045 | 0.137856 |
| Al | Al90  | 0.935319 | 0.607164 | 0.402104 |
| Al | Al91  | 0.602392 | 0.942001 | 0.738768 |
| Al | Al92  | 0.271837 | 0.276407 | 0.073683 |
| Al | Al93  | 0.394634 | 0.843730 | 0.404909 |
| Al | Al94  | 0.060821 | 0.175824 | 0.737995 |
| Al | Al95  | 0.729176 | 0.510310 | 0.068748 |
| Al | Al96  | 0.156570 | 0.053670 | 0.405135 |
| Al | Al97  | 0.828596 | 0.400557 | 0.734015 |
| Al | Al98  | 0.496976 | 0.732278 | 0.072929 |
| Al | Al99  | 0.064787 | 0.402718 | 0.533722 |
| Al | Al100 | 0.722001 | 0.735417 | 0.862067 |
| Al | Al101 | 0.392307 | 0.070089 | 0.198418 |
| Al | Al102 | 0.597893 | 0.168782 | 0.533722 |
| Al | Al103 | 0.268065 | 0.503664 | 0.867146 |
| Al | Al104 | 0.934262 | 0.835321 | 0.197610 |
| Al | Al105 | 0.834977 | 0.953879 | 0.531878 |
| Al | Al106 | 0.499235 | 0.279332 | 0.865526 |
| Al | Al107 | 0.168316 | 0.614212 | 0.199085 |
| Si | Si108 | 0.928977 | 0.829883 | 0.407793 |
| P  | P109  | 0.063644 | 0.176647 | 0.530261 |
| P  | P110  | 0.725180 | 0.509737 | 0.857451 |
| P  | P111  | 0.395375 | 0.843715 | 0.195547 |
| P  | P112  | 0.831458 | 0.391032 | 0.526467 |
| P  | P113  | 0.493088 | 0.732339 | 0.861007 |
| P  | P114  | 0.161896 | 0.064592 | 0.196270 |
| P  | P115  | 0.600227 | 0.938129 | 0.531232 |
| P  | P116  | 0.271793 | 0.277420 | 0.862884 |
| P  | P117  | 0.939732 | 0.611415 | 0.190703 |
| P  | P118  | 0.600907 | 0.172239 | 0.739924 |

|   |      |          |          |          |
|---|------|----------|----------|----------|
| P | P119 | 0.270912 | 0.503608 | 0.077320 |
| P | P120 | 0.166402 | 0.616107 | 0.408085 |
| P | P121 | 0.831964 | 0.948410 | 0.742562 |
| P | P122 | 0.501993 | 0.281789 | 0.075841 |
| P | P123 | 0.392583 | 0.072791 | 0.408164 |
| P | P124 | 0.058828 | 0.403087 | 0.741169 |
| P | P125 | 0.725042 | 0.735961 | 0.073519 |

***TS-C7-Cyclization-Si-ALPO-34***

|                                |     |                    |          |          |
|--------------------------------|-----|--------------------|----------|----------|
| data_                          |     |                    |          |          |
| _audit_creation_method         |     | 'Materials Studio' |          |          |
| _cell_length_a                 |     | 13.885913          |          |          |
| _cell_length_b                 |     | 13.885913          |          |          |
| _cell_length_c                 |     | 15.094859          |          |          |
| _cell_angle_alpha              |     | 90.000000          |          |          |
| _cell_angle_beta               |     | 90.000000          |          |          |
| _cell_angle_gamma              |     | 120.000000         |          |          |
| _symmetry_space_group_name_H-M |     | 'P1'               |          |          |
| loop_                          |     |                    |          |          |
| _atom_site_type_symbol         |     |                    |          |          |
| _atom_site_label               |     |                    |          |          |
| _atom_site_fract_x             |     |                    |          |          |
| _atom_site_fract_y             |     |                    |          |          |
| _atom_site_fract_z             |     |                    |          |          |
| H                              | H1  | 0.598278           | 0.440771 | 0.631733 |
| H                              | H2  | 0.537802           | 0.620011 | 0.585709 |
| H                              | H3  | 0.630153           | 0.620692 | 0.674017 |
| H                              | H4  | 0.534533           | 0.548059 | 0.320716 |
| H                              | H5  | 0.732814           | 0.552299 | 0.497230 |
| H                              | H6  | 0.593949           | 0.470992 | 0.361278 |
| H                              | H7  | 0.401274           | 0.345692 | 0.552332 |
| H                              | H8  | 0.512958           | 0.351446 | 0.495593 |
| H                              | H9  | 0.431809           | 0.518452 | 0.465915 |
| H                              | H10 | 0.393736           | 0.398793 | 0.403209 |
| H                              | H11 | 0.717615           | 0.677896 | 0.362411 |
| H                              | H12 | 0.632613           | 0.694764 | 0.437127 |
| H                              | H13 | 0.764830           | 0.689068 | 0.540558 |
| C                              | C14 | 0.557657           | 0.476973 | 0.593328 |
| C                              | C15 | 0.577208           | 0.578620 | 0.617739 |
| C                              | C16 | 0.481271           | 0.404166 | 0.521148 |
| C                              | C17 | 0.562596           | 0.526375 | 0.381515 |
| C                              | C18 | 0.461676           | 0.462956 | 0.442906 |

|   |     |          |          |          |
|---|-----|----------|----------|----------|
| C | C19 | 0.659802 | 0.636068 | 0.417763 |
| C | C20 | 0.727656 | 0.626919 | 0.489461 |
| O | O21 | 0.093360 | 0.298765 | 0.507650 |
| O | O22 | 0.306805 | 0.403999 | 0.851458 |
| O | O23 | 0.833236 | 0.437165 | 0.624236 |
| O | O24 | 0.496795 | 0.157283 | 0.468484 |
| O | O25 | 0.741611 | 0.626257 | 0.834576 |
| O | O26 | 0.974458 | 0.736559 | 0.176035 |
| O | O27 | 0.503315 | 0.766435 | 0.963032 |
| O | O28 | 0.157719 | 0.483966 | 0.807425 |
| O | O29 | 0.414373 | 0.961266 | 0.174782 |
| O | O30 | 0.629274 | 0.062331 | 0.524119 |
| O | O31 | 0.169711 | 0.101903 | 0.296734 |
| O | O32 | 0.832542 | 0.822616 | 0.128824 |
| O | O33 | 0.724210 | 0.295413 | 0.506974 |
| O | O34 | 0.609839 | 0.422668 | 0.846737 |
| O | O35 | 0.576673 | 0.904941 | 0.631240 |
| O | O36 | 0.867551 | 0.872570 | 0.474406 |
| O | O37 | 0.386130 | 0.637285 | 0.840685 |
| O | O38 | 0.279898 | 0.757494 | 0.184170 |
| O | O39 | 0.248555 | 0.250247 | 0.963800 |
| O | O40 | 0.530243 | 0.194023 | 0.806266 |
| O | O41 | 0.056600 | 0.969929 | 0.173697 |
| O | O42 | 0.942592 | 0.101213 | 0.526008 |
| O | O43 | 0.912842 | 0.584402 | 0.291134 |
| O | O44 | 0.198847 | 0.528062 | 0.140161 |
| O | O45 | 0.709915 | 0.939102 | 0.505949 |
| O | O46 | 0.590291 | 0.708719 | 0.842471 |
| O | O47 | 0.106173 | 0.182836 | 0.630152 |
| O | O48 | 0.151281 | 0.523647 | 0.471160 |
| O | O49 | 0.377249 | 0.270978 | 0.838385 |
| O | O50 | 0.260612 | 0.041533 | 0.181574 |
| O | O51 | 0.764798 | 0.516878 | 0.958129 |
| O | O52 | 0.821049 | 0.855580 | 0.803904 |
| O | O53 | 0.046724 | 0.604470 | 0.170498 |
| O | O54 | 0.927493 | 0.364590 | 0.522791 |
| O | O55 | 0.434367 | 0.847893 | 0.296229 |
| O | O56 | 0.490229 | 0.188866 | 0.136833 |
| O | O57 | 0.899665 | 0.706462 | 0.440684 |
| O | O58 | 0.702459 | 0.619752 | 0.094128 |
| O | O59 | 0.171494 | 0.587002 | 0.314909 |
| O | O60 | 0.509475 | 0.863587 | 0.475114 |
| O | O61 | 0.593538 | 0.062979 | 0.762324 |
| O | O62 | 0.371575 | 0.956475 | 0.426943 |



|    |       |          |          |          |
|----|-------|----------|----------|----------|
| O  | O63   | 0.832444 | 0.920694 | 0.648900 |
| O  | O64   | 0.177911 | 0.203909 | 0.809224 |
| O  | O65   | 0.263554 | 0.395831 | 0.104236 |
| O  | O66   | 0.032723 | 0.285922 | 0.757921 |
| O  | O67   | 0.504971 | 0.254136 | 0.981059 |
| O  | O68   | 0.848984 | 0.535599 | 0.134871 |
| O  | O69   | 0.283494 | 0.721014 | 0.436138 |
| O  | O70   | 0.398017 | 0.599236 | 0.095730 |
| O  | O71   | 0.429747 | 0.108994 | 0.313668 |
| O  | O72   | 0.134377 | 0.147620 | 0.472822 |
| O  | O73   | 0.950680 | 0.053856 | 0.768793 |
| O  | O74   | 0.069617 | 0.918585 | 0.420523 |
| O  | O75   | 0.103510 | 0.443667 | 0.648501 |
| O  | O76   | 0.809018 | 0.495324 | 0.801371 |
| O  | O77   | 0.621024 | 0.386928 | 0.101265 |
| O  | O78   | 0.728523 | 0.266983 | 0.756779 |
| O  | O79   | 0.753321 | 0.767629 | 0.978118 |
| O  | O80   | 0.479045 | 0.828597 | 0.139508 |
| O  | O81   | 0.298463 | 0.088756 | 0.437301 |
| O  | O82   | 0.416898 | 0.316573 | 0.096599 |
| O  | O83   | 0.897537 | 0.830210 | 0.308444 |
| O  | O84   | 0.856665 | 0.487971 | 0.463829 |
| O  | O85   | 0.962729 | 0.419849 | 0.764784 |
| O  | O86   | 0.080118 | 0.652083 | 0.425590 |
| O  | O87   | 0.570643 | 0.181869 | 0.647504 |
| O  | O88   | 0.515614 | 0.837072 | 0.809655 |
| O  | O89   | 0.630720 | 0.751591 | 0.106516 |
| O  | O90   | 0.745977 | 0.982447 | 0.766108 |
| O  | O91   | 0.243348 | 0.509773 | 0.983508 |
| O  | O92   | 0.187221 | 0.168647 | 0.141323 |
| Al | Al93  | 0.939950 | 0.611649 | 0.404966 |
| Al | Al94  | 0.608105 | 0.947180 | 0.742461 |
| Al | Al95  | 0.278011 | 0.281574 | 0.076815 |
| Al | Al96  | 0.399657 | 0.848113 | 0.408234 |
| Al | Al97  | 0.066831 | 0.180963 | 0.741140 |
| Al | Al98  | 0.735150 | 0.515098 | 0.071900 |
| Al | Al99  | 0.163043 | 0.058705 | 0.408275 |
| Al | Al100 | 0.834108 | 0.405121 | 0.737448 |
| Al | Al101 | 0.502959 | 0.737389 | 0.076259 |
| Al | Al102 | 0.069524 | 0.407253 | 0.536423 |
| Al | Al103 | 0.727469 | 0.740231 | 0.865545 |
| Al | Al104 | 0.398235 | 0.074946 | 0.201325 |
| Al | Al105 | 0.604422 | 0.172694 | 0.536731 |
| Al | Al106 | 0.273057 | 0.508686 | 0.870693 |

|    |       |          |          |          |
|----|-------|----------|----------|----------|
| Al | Al107 | 0.940345 | 0.841194 | 0.200524 |
| Al | Al108 | 0.841006 | 0.958760 | 0.536011 |
| Al | Al109 | 0.505014 | 0.284890 | 0.868573 |
| Al | Al110 | 0.173964 | 0.619372 | 0.202135 |
| Si | Si111 | 0.936665 | 0.836781 | 0.410338 |
| P  | P112  | 0.068776 | 0.181467 | 0.533629 |
| P  | P113  | 0.731276 | 0.514957 | 0.860970 |
| P  | P114  | 0.401557 | 0.848589 | 0.198925 |
| P  | P115  | 0.836577 | 0.396380 | 0.529729 |
| P  | P116  | 0.499033 | 0.737298 | 0.864526 |
| P  | P117  | 0.168059 | 0.069884 | 0.199249 |
| P  | P118  | 0.606558 | 0.942782 | 0.534365 |
| P  | P119  | 0.277402 | 0.282511 | 0.866165 |
| P  | P120  | 0.945931 | 0.616473 | 0.193682 |
| P  | P121  | 0.606139 | 0.176587 | 0.743198 |
| P  | P122  | 0.276201 | 0.508483 | 0.080555 |
| P  | P123  | 0.171005 | 0.621017 | 0.411649 |
| P  | P124  | 0.837560 | 0.953521 | 0.746333 |
| P  | P125  | 0.507886 | 0.286551 | 0.078803 |
| P  | P126  | 0.397946 | 0.076810 | 0.411091 |
| P  | P127  | 0.064227 | 0.407974 | 0.744341 |
| P  | P128  | 0.730325 | 0.740474 | 0.077074 |

***TS-Elimination-C6-C3-H2O-Si-AIPO-34***

|                                |    |                    |          |          |
|--------------------------------|----|--------------------|----------|----------|
| data_                          |    |                    |          |          |
| _audit_creation_method         |    | 'Materials Studio' |          |          |
| _cell_length_a                 |    | 13.885913          |          |          |
| _cell_length_b                 |    | 13.885913          |          |          |
| _cell_length_c                 |    | 15.094859          |          |          |
| _cell_angle_alpha              |    | 90.000000          |          |          |
| _cell_angle_beta               |    | 90.000000          |          |          |
| _cell_angle_gamma              |    | 120.000000         |          |          |
| _symmetry_space_group_name_H-M |    | 'P1'               |          |          |
| loop_                          |    |                    |          |          |
| _atom_site_type_symbol         |    |                    |          |          |
| _atom_site_label               |    |                    |          |          |
| _atom_site_fract_x             |    |                    |          |          |
| _atom_site_fract_y             |    |                    |          |          |
| _atom_site_fract_z             |    |                    |          |          |
| H                              | H1 | 0.902800           | 0.726369 | 0.549552 |
| H                              | H2 | 0.651436           | 0.444506 | 0.646113 |
| H                              | H3 | 0.509624           | 0.378222 | 0.620874 |

|   |     |          |          |          |
|---|-----|----------|----------|----------|
| H | H4  | 0.610315 | 0.426131 | 0.533620 |
| H | H5  | 0.565309 | 0.572876 | 0.661399 |
| H | H6  | 0.492440 | 0.707655 | 0.598708 |
| H | H7  | 0.373933 | 0.595622 | 0.648050 |
| H | H8  | 0.359831 | 0.672473 | 0.561205 |
| H | H9  | 0.313664 | 0.313117 | 0.622922 |
| H | H10 | 0.383521 | 0.443183 | 0.676642 |
| H | H11 | 0.251433 | 0.396037 | 0.631824 |
| H | H12 | 0.768620 | 0.674706 | 0.593166 |
| H | H13 | 0.696164 | 0.625671 | 0.486546 |
| H | H14 | 0.667575 | 0.719118 | 0.553130 |
| H | H15 | 0.895434 | 0.791344 | 0.634219 |
| H | H16 | 0.316103 | 0.358422 | 0.411433 |
| H | H17 | 0.392948 | 0.602381 | 0.383680 |
| H | H18 | 0.368477 | 0.299514 | 0.487257 |
| H | H19 | 0.460481 | 0.416090 | 0.423487 |
| H | H20 | 0.504422 | 0.577293 | 0.393729 |
| H | H21 | 0.518008 | 0.703241 | 0.433352 |
| C | C22 | 0.591028 | 0.444267 | 0.599372 |
| C | C23 | 0.381976 | 0.377958 | 0.460226 |
| C | C24 | 0.380359 | 0.452607 | 0.532277 |
| C | C25 | 0.601222 | 0.555584 | 0.603619 |
| C | C26 | 0.415663 | 0.561560 | 0.516766 |
| C | C27 | 0.409529 | 0.636833 | 0.585356 |
| C | C28 | 0.460940 | 0.613908 | 0.427678 |
| C | C29 | 0.330282 | 0.398608 | 0.620367 |
| C | C30 | 0.671661 | 0.643205 | 0.550340 |
| O | O31 | 0.082678 | 0.305082 | 0.504975 |
| O | O32 | 0.301286 | 0.411408 | 0.846162 |
| O | O33 | 0.154567 | 0.491631 | 0.796479 |
| O | O34 | 0.169121 | 0.120882 | 0.287216 |
| O | O35 | 0.082695 | 0.175186 | 0.621791 |
| O | O36 | 0.370476 | 0.277803 | 0.830730 |
| O | O37 | 0.253118 | 0.049963 | 0.174536 |
| O | O38 | 0.483089 | 0.196540 | 0.129095 |
| O | O39 | 0.172824 | 0.213546 | 0.797255 |
| O | O40 | 0.257349 | 0.403079 | 0.093491 |
| O | O41 | 0.026464 | 0.293974 | 0.747786 |
| O | O42 | 0.424431 | 0.117900 | 0.305664 |
| O | O43 | 0.124795 | 0.157113 | 0.464657 |
| O | O44 | 0.088592 | 0.452934 | 0.640327 |
| O | O45 | 0.294068 | 0.102243 | 0.428803 |
| O | O46 | 0.408472 | 0.322068 | 0.085194 |
| O | O47 | 0.177270 | 0.173482 | 0.129133 |

|   |     |          |          |          |
|---|-----|----------|----------|----------|
| 0 | 048 | 0.736447 | 0.633830 | 0.829006 |
| 0 | 049 | 0.970279 | 0.744311 | 0.166137 |
| 0 | 050 | 0.826510 | 0.829594 | 0.122028 |
| 0 | 051 | 0.564466 | 0.924788 | 0.622321 |
| 0 | 052 | 0.863600 | 0.878841 | 0.467143 |
| 0 | 053 | 0.905969 | 0.596206 | 0.285325 |
| 0 | 054 | 0.698154 | 0.937263 | 0.504670 |
| 0 | 055 | 0.583963 | 0.714773 | 0.834622 |
| 0 | 056 | 0.813437 | 0.859498 | 0.792428 |
| 0 | 057 | 0.918820 | 0.727206 | 0.442476 |
| 0 | 058 | 0.695916 | 0.628061 | 0.083004 |
| 0 | 059 | 0.503751 | 0.880374 | 0.465125 |
| 0 | 060 | 0.840079 | 0.933881 | 0.640056 |
| 0 | 061 | 0.841033 | 0.542651 | 0.129681 |
| 0 | 062 | 0.888949 | 0.827536 | 0.302198 |
| 0 | 063 | 0.845976 | 0.501598 | 0.459754 |
| 0 | 064 | 0.509134 | 0.842347 | 0.799314 |
| 0 | 065 | 0.624861 | 0.760477 | 0.097585 |
| 0 | 066 | 0.737296 | 0.985024 | 0.751407 |
| 0 | 067 | 0.837668 | 0.446689 | 0.618354 |
| 0 | 068 | 0.490886 | 0.163222 | 0.461394 |
| 0 | 069 | 0.636767 | 0.078143 | 0.508769 |
| 0 | 070 | 0.718413 | 0.307770 | 0.502673 |
| 0 | 071 | 0.602700 | 0.431276 | 0.841806 |
| 0 | 072 | 0.524347 | 0.204726 | 0.794783 |
| 0 | 073 | 0.928942 | 0.107765 | 0.509535 |
| 0 | 074 | 0.922921 | 0.378272 | 0.505091 |
| 0 | 075 | 0.590202 | 0.072074 | 0.764060 |
| 0 | 076 | 0.941492 | 0.061220 | 0.768413 |
| 0 | 077 | 0.800566 | 0.501187 | 0.793694 |
| 0 | 078 | 0.612923 | 0.394510 | 0.092158 |
| 0 | 079 | 0.722814 | 0.275057 | 0.747260 |
| 0 | 080 | 0.956611 | 0.426938 | 0.764952 |
| 0 | 081 | 0.564536 | 0.178184 | 0.639275 |
| 0 | 082 | 0.498335 | 0.775681 | 0.954221 |
| 0 | 083 | 0.760451 | 0.523321 | 0.951465 |
| 0 | 084 | 0.749566 | 0.779813 | 0.970067 |
| 0 | 085 | 0.405220 | 0.968430 | 0.165302 |
| 0 | 086 | 0.380239 | 0.643799 | 0.833356 |
| 0 | 087 | 0.271529 | 0.764247 | 0.174826 |
| 0 | 088 | 0.048668 | 0.977918 | 0.172198 |
| 0 | 089 | 0.192444 | 0.534565 | 0.132378 |
| 0 | 090 | 0.153377 | 0.530703 | 0.463393 |
| 0 | 091 | 0.038259 | 0.608320 | 0.166366 |

|    |       |          |          |          |
|----|-------|----------|----------|----------|
| O  | O92   | 0.425598 | 0.856271 | 0.287149 |
| O  | O93   | 0.171605 | 0.594011 | 0.306852 |
| O  | O94   | 0.359718 | 0.964155 | 0.417960 |
| O  | O95   | 0.277885 | 0.730077 | 0.428421 |
| O  | O96   | 0.391211 | 0.606998 | 0.085455 |
| O  | O97   | 0.066416 | 0.935900 | 0.407112 |
| O  | O98   | 0.470902 | 0.835976 | 0.130700 |
| O  | O99   | 0.073034 | 0.650297 | 0.417625 |
| O  | O100  | 0.237410 | 0.252925 | 0.954021 |
| O  | O101  | 0.499035 | 0.258967 | 0.972548 |
| O  | O102  | 0.234328 | 0.517601 | 0.975097 |
| O  | O103  | 0.873010 | 0.717004 | 0.612513 |
| Al | Al104 | 0.269602 | 0.287389 | 0.066557 |
| Al | Al105 | 0.056626 | 0.186147 | 0.733858 |
| Al | Al106 | 0.159567 | 0.074652 | 0.398036 |
| Al | Al107 | 0.061896 | 0.416546 | 0.527444 |
| Al | Al108 | 0.390754 | 0.082833 | 0.193616 |
| Al | Al109 | 0.498649 | 0.292282 | 0.860879 |
| Al | Al110 | 0.935953 | 0.621578 | 0.398864 |
| Al | Al111 | 0.600022 | 0.955814 | 0.734401 |
| Al | Al112 | 0.496622 | 0.745588 | 0.067817 |
| Al | Al113 | 0.721356 | 0.747494 | 0.858371 |
| Al | Al114 | 0.933407 | 0.846309 | 0.194593 |
| Al | Al115 | 0.833987 | 0.964698 | 0.525754 |
| Al | Al116 | 0.728586 | 0.522639 | 0.064980 |
| Al | Al117 | 0.830144 | 0.413035 | 0.731439 |
| Al | Al118 | 0.601419 | 0.181033 | 0.527367 |
| Al | Al119 | 0.391358 | 0.858424 | 0.398890 |
| Al | Al120 | 0.266645 | 0.515740 | 0.863363 |
| Al | Al121 | 0.167485 | 0.625635 | 0.194700 |
| Si | Si122 | 0.934857 | 0.845405 | 0.402539 |
| P  | P123  | 0.054449 | 0.185438 | 0.524638 |
| P  | P124  | 0.161314 | 0.079608 | 0.191698 |
| P  | P125  | 0.270090 | 0.288954 | 0.857601 |
| P  | P126  | 0.269270 | 0.515866 | 0.071571 |
| P  | P127  | 0.391269 | 0.086258 | 0.403017 |
| P  | P128  | 0.056634 | 0.416000 | 0.736964 |
| P  | P129  | 0.725146 | 0.521982 | 0.855034 |
| P  | P130  | 0.601070 | 0.955626 | 0.525256 |
| P  | P131  | 0.939100 | 0.624154 | 0.187502 |
| P  | P132  | 0.832625 | 0.960581 | 0.737717 |
| P  | P133  | 0.724827 | 0.749520 | 0.068782 |
| P  | P134  | 0.832160 | 0.408730 | 0.521540 |
| P  | P135  | 0.600890 | 0.182787 | 0.736101 |

|   |      |          |          |          |
|---|------|----------|----------|----------|
| P | P136 | 0.500601 | 0.293077 | 0.069811 |
| P | P137 | 0.392962 | 0.856007 | 0.189674 |
| P | P138 | 0.493125 | 0.744272 | 0.856257 |
| P | P139 | 0.168103 | 0.626321 | 0.403608 |

***TS-Elimination-TMB-C3-H2O-Si-ALPO-34***

data\_

\_audit\_creation\_method 'Materials Studio'

\_cell\_length\_a 13.885913

\_cell\_length\_b 13.885913

\_cell\_length\_c 15.094859

\_cell\_angle\_alpha 90.000000

\_cell\_angle\_beta 90.000000

\_cell\_angle\_gamma 120.000000

\_symmetry\_space\_group\_name\_H-M 'P1'

loop\_

\_atom\_site\_type\_symbol

\_atom\_site\_label

\_atom\_site\_fract\_x

\_atom\_site\_fract\_y

\_atom\_site\_fract\_z

|   |     |          |          |          |
|---|-----|----------|----------|----------|
| H | H1  | 0.908160 | 0.728481 | 0.551162 |
| H | H2  | 0.649111 | 0.440098 | 0.665183 |
| H | H3  | 0.506111 | 0.377696 | 0.646416 |
| H | H4  | 0.598485 | 0.402851 | 0.555561 |
| H | H5  | 0.525966 | 0.622051 | 0.238380 |
| H | H6  | 0.650850 | 0.676720 | 0.298513 |
| H | H7  | 0.570494 | 0.742572 | 0.304751 |
| H | H8  | 0.599717 | 0.469660 | 0.300996 |
| H | H9  | 0.473796 | 0.430532 | 0.246189 |
| H | H10 | 0.481744 | 0.338662 | 0.323360 |
| H | H11 | 0.572144 | 0.578555 | 0.660001 |
| H | H12 | 0.433552 | 0.630052 | 0.659004 |
| H | H13 | 0.299664 | 0.579989 | 0.616210 |
| H | H14 | 0.408476 | 0.710723 | 0.582244 |
| H | H15 | 0.315094 | 0.306218 | 0.601943 |
| H | H16 | 0.374277 | 0.426674 | 0.669709 |
| H | H17 | 0.248384 | 0.384887 | 0.615893 |
| H | H18 | 0.766818 | 0.661629 | 0.590133 |
| H | H19 | 0.696099 | 0.591329 | 0.487471 |
| H | H20 | 0.672752 | 0.699642 | 0.534673 |
| H | H21 | 0.892295 | 0.787705 | 0.635024 |

|   |     |          |          |          |
|---|-----|----------|----------|----------|
| H | H22 | 0.397005 | 0.328342 | 0.461468 |
| H | H23 | 0.492688 | 0.719690 | 0.444547 |
| C | C24 | 0.587027 | 0.434986 | 0.617952 |
| C | C25 | 0.565410 | 0.661550 | 0.301089 |
| C | C26 | 0.475580 | 0.476815 | 0.383114 |
| C | C27 | 0.509063 | 0.425768 | 0.309842 |
| C | C28 | 0.418386 | 0.414891 | 0.457489 |
| C | C29 | 0.389323 | 0.460543 | 0.528686 |
| C | C30 | 0.604342 | 0.548419 | 0.607621 |
| C | C31 | 0.415192 | 0.572393 | 0.523673 |
| C | C32 | 0.387765 | 0.626213 | 0.598697 |
| C | C33 | 0.470465 | 0.633326 | 0.448369 |
| C | C34 | 0.502467 | 0.589252 | 0.378622 |
| C | C35 | 0.329135 | 0.390624 | 0.608006 |
| C | C36 | 0.674643 | 0.623370 | 0.545382 |
| O | O37 | 0.076436 | 0.303729 | 0.504401 |
| O | O38 | 0.300925 | 0.411848 | 0.840240 |
| O | O39 | 0.153132 | 0.491542 | 0.794080 |
| O | O40 | 0.168392 | 0.121525 | 0.283970 |
| O | O41 | 0.079613 | 0.173604 | 0.619288 |
| O | O42 | 0.369878 | 0.277593 | 0.829905 |
| O | O43 | 0.252760 | 0.049798 | 0.172409 |
| O | O44 | 0.483276 | 0.198241 | 0.130272 |
| O | O45 | 0.172459 | 0.212793 | 0.794343 |
| O | O46 | 0.258748 | 0.403945 | 0.094191 |
| O | O47 | 0.025804 | 0.293165 | 0.746519 |
| O | O48 | 0.422912 | 0.114325 | 0.304321 |
| O | O49 | 0.129543 | 0.165073 | 0.462247 |
| O | O50 | 0.083137 | 0.451392 | 0.638941 |
| O | O51 | 0.295328 | 0.108210 | 0.426222 |
| O | O52 | 0.407790 | 0.321676 | 0.081844 |
| O | O53 | 0.176714 | 0.172547 | 0.125392 |
| O | O54 | 0.732635 | 0.631732 | 0.826134 |
| O | O55 | 0.969522 | 0.743289 | 0.164602 |
| O | O56 | 0.825224 | 0.828967 | 0.121590 |
| O | O57 | 0.566136 | 0.924552 | 0.620091 |
| O | O58 | 0.857549 | 0.873222 | 0.465383 |
| O | O59 | 0.903348 | 0.595647 | 0.284524 |
| O | O60 | 0.696614 | 0.937637 | 0.499259 |
| O | O61 | 0.582382 | 0.715187 | 0.837162 |
| O | O62 | 0.810796 | 0.857814 | 0.789259 |
| O | O63 | 0.923821 | 0.730568 | 0.440811 |
| O | O64 | 0.694316 | 0.627700 | 0.082651 |
| O | O65 | 0.503291 | 0.890066 | 0.463343 |

|   |      |          |          |          |
|---|------|----------|----------|----------|
| 0 | 066  | 0.835773 | 0.933926 | 0.637594 |
| 0 | 067  | 0.839907 | 0.541606 | 0.128929 |
| 0 | 068  | 0.890605 | 0.828526 | 0.300777 |
| 0 | 069  | 0.845942 | 0.505036 | 0.459904 |
| 0 | 070  | 0.507614 | 0.841296 | 0.796068 |
| 0 | 071  | 0.625141 | 0.762143 | 0.091699 |
| 0 | 072  | 0.736630 | 0.985927 | 0.751741 |
| 0 | 073  | 0.836248 | 0.446700 | 0.617843 |
| 0 | 074  | 0.489036 | 0.158234 | 0.459823 |
| 0 | 075  | 0.643075 | 0.083702 | 0.511351 |
| 0 | 076  | 0.714275 | 0.311494 | 0.501008 |
| 0 | 077  | 0.601609 | 0.429787 | 0.845994 |
| 0 | 078  | 0.523034 | 0.204244 | 0.793623 |
| 0 | 079  | 0.929361 | 0.103997 | 0.503978 |
| 0 | 080  | 0.918186 | 0.377238 | 0.502755 |
| 0 | 081  | 0.587477 | 0.070764 | 0.761676 |
| 0 | 082  | 0.940645 | 0.059518 | 0.766105 |
| 0 | 083  | 0.797689 | 0.499179 | 0.793006 |
| 0 | 084  | 0.612263 | 0.394212 | 0.087734 |
| 0 | 085  | 0.721024 | 0.273626 | 0.745422 |
| 0 | 086  | 0.953869 | 0.424421 | 0.765476 |
| 0 | 087  | 0.562035 | 0.178263 | 0.637884 |
| 0 | 088  | 0.496415 | 0.780957 | 0.952885 |
| 0 | 089  | 0.763822 | 0.528286 | 0.950632 |
| 0 | 090  | 0.753645 | 0.778938 | 0.968031 |
| 0 | 091  | 0.404668 | 0.968073 | 0.161875 |
| 0 | 092  | 0.378666 | 0.644472 | 0.834467 |
| 0 | 093  | 0.270301 | 0.764166 | 0.173318 |
| 0 | 094  | 0.048398 | 0.977406 | 0.169327 |
| 0 | 095  | 0.192787 | 0.535717 | 0.129602 |
| 0 | 096  | 0.150454 | 0.529025 | 0.462473 |
| 0 | 097  | 0.037069 | 0.606770 | 0.167222 |
| 0 | 098  | 0.422523 | 0.858280 | 0.286936 |
| 0 | 099  | 0.174676 | 0.593971 | 0.305612 |
| 0 | 0100 | 0.349286 | 0.960794 | 0.417159 |
| 0 | 0101 | 0.278376 | 0.728516 | 0.428990 |
| 0 | 0102 | 0.391017 | 0.607604 | 0.080759 |
| 0 | 0103 | 0.064684 | 0.941896 | 0.408331 |
| 0 | 0104 | 0.470583 | 0.834528 | 0.132386 |
| 0 | 0105 | 0.074120 | 0.650542 | 0.413673 |
| 0 | 0106 | 0.235970 | 0.256475 | 0.951320 |
| 0 | 0107 | 0.495854 | 0.253021 | 0.971915 |
| 0 | 0108 | 0.231691 | 0.512393 | 0.972924 |
| 0 | 0109 | 0.877417 | 0.715553 | 0.613324 |



|    |       |          |          |          |
|----|-------|----------|----------|----------|
| Al | Al110 | 0.268944 | 0.287833 | 0.064141 |
| Al | Al111 | 0.055410 | 0.184966 | 0.731609 |
| Al | Al112 | 0.160025 | 0.079448 | 0.395948 |
| Al | Al113 | 0.056946 | 0.415529 | 0.525902 |
| Al | Al114 | 0.389976 | 0.081894 | 0.191921 |
| Al | Al115 | 0.497017 | 0.290273 | 0.861089 |
| Al | Al116 | 0.937301 | 0.623174 | 0.397472 |
| Al | Al117 | 0.599404 | 0.955595 | 0.732461 |
| Al | Al118 | 0.495906 | 0.747048 | 0.065402 |
| Al | Al119 | 0.720347 | 0.746854 | 0.856787 |
| Al | Al120 | 0.933505 | 0.846060 | 0.192909 |
| Al | Al121 | 0.831320 | 0.962392 | 0.522598 |
| Al | Al122 | 0.728430 | 0.523267 | 0.063672 |
| Al | Al123 | 0.828370 | 0.411842 | 0.730692 |
| Al | Al124 | 0.600919 | 0.182144 | 0.526432 |
| Al | Al125 | 0.387185 | 0.859212 | 0.398581 |
| Al | Al126 | 0.265194 | 0.514908 | 0.860893 |
| Al | Al127 | 0.167353 | 0.625094 | 0.193855 |
| Si | Si128 | 0.934880 | 0.846595 | 0.401751 |
| P  | P129  | 0.053275 | 0.185548 | 0.521932 |
| P  | P130  | 0.160810 | 0.079436 | 0.188824 |
| P  | P131  | 0.269352 | 0.289637 | 0.854525 |
| P  | P132  | 0.268923 | 0.515346 | 0.069374 |
| P  | P133  | 0.388025 | 0.084628 | 0.401620 |
| P  | P134  | 0.054111 | 0.414654 | 0.735883 |
| P  | P135  | 0.724134 | 0.521858 | 0.854971 |
| P  | P136  | 0.602670 | 0.959341 | 0.523531 |
| P  | P137  | 0.937893 | 0.623168 | 0.186908 |
| P  | P138  | 0.830652 | 0.960027 | 0.735691 |
| P  | P139  | 0.725142 | 0.749551 | 0.066493 |
| P  | P140  | 0.829529 | 0.410260 | 0.520462 |
| P  | P141  | 0.598850 | 0.181936 | 0.734428 |
| P  | P142  | 0.499581 | 0.291852 | 0.068031 |
| P  | P143  | 0.391558 | 0.855932 | 0.188792 |
| P  | P144  | 0.491533 | 0.745597 | 0.855971 |
| P  | P145  | 0.168871 | 0.625421 | 0.402256 |
